# Supplementary material
Source: PubMed Central journal article supplement (PMC4762521)
Supplement: 10.1074_M115.052357_mcp.M115.052357-2.pdf [file 10.1074_M115.052357_mcp.M115.052357-2.pdf]

| Kinase | Family    | Experimental logo | Predicted logo | Top motifs                                                                                                                             | Partners | Partner sites | Experimental sites | Pauc |
|--------|-----------|-------------------|----------------|----------------------------------------------------------------------------------------------------------------------------------------|----------|---------------|--------------------|------|
| CLK1   | CMGC_CLK  |                   |                | <p>...SR[ST]RS..R (20)</p> <p>...S.[ST]RSRS. (15)</p> <p>.SRS.[ST]P... (11)</p> <p>...R[ST]RS..R (14)</p> <p>R.RS.[ST]R... (12)</p>    | 48       | 75/1024       | 4                  | 1.00 |
| LIMK2  | TKL_LISK  |                   |                | <p>..RRR[ST].S... (14)</p> <p>...RR[ST]RS... (10)</p> <p>R.RS.[ST].T... (16)</p> <p>R..S.[ST]SP... (19)</p> <p>.RR..[ST].SS.. (14)</p> | 22       | 73/672        | 0                  | 1.00 |
| SRPK1  | CMGC_SRPK |                   |                | <p>...SR[ST]RS..R (18)</p> <p>...K[ST]RS.S. (11)</p> <p>.SRS.[ST]P... (13)</p> <p>R..S.[ST].S..R (12)</p> <p>...RR[ST].S..R (11)</p>   | 45       | 65/868        | 19                 | 1.00 |
| TNK2   | TK_Ack    |                   |                | <p>.....Y.VPP. (10)</p>                                                                                                                | 59       | 10/263        | 3                  | 1.00 |

CSNK1G2 CK1\_CK1

-5 -4 -3 -2 -1 0 1 2 3 4 5

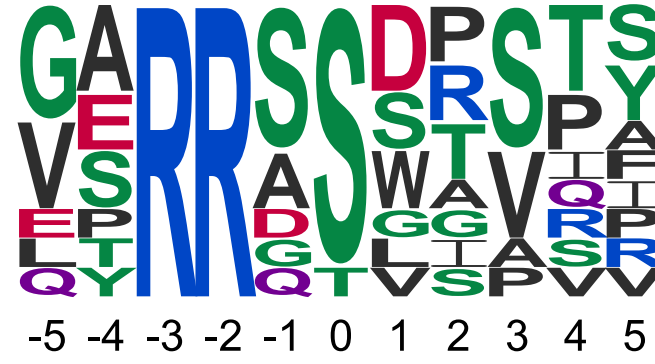

..RR.[ST]..... (10)

22

10/160

1

0.99

SRPK2 CMGC\_SRPK

-5 -4 -3 -2 -1 0 1 2 3 4 5

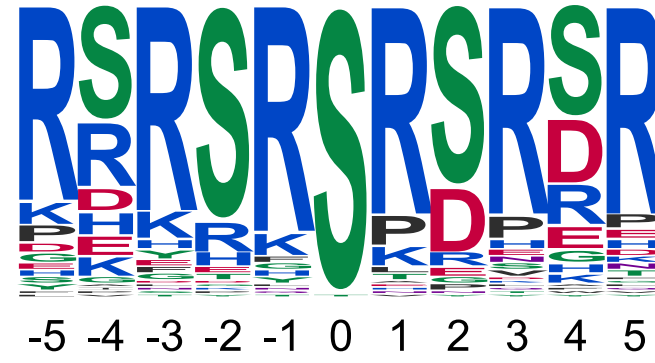

R.RS.[ST]...R (23)  
...R[ST]RS..R (25)  
..RSR[ST].D... (12)  
...S.[ST]RS.S. (12)  
R.R.R[ST]..... (12)

29

85/468

1

0.99

CSNK1G1 CK1\_CK1

-5 -4 -3 -2 -1 0 1 2 3 4 5

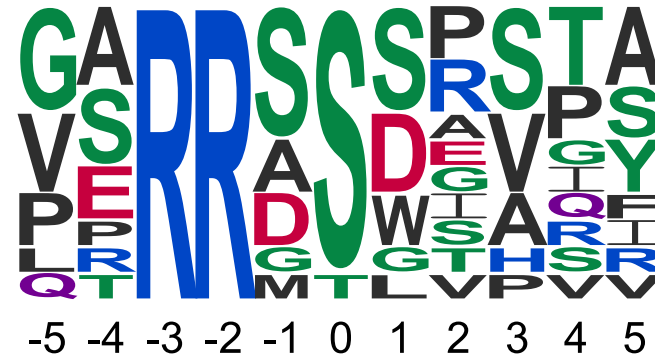

..RR.[ST]..... (11)

23

11/187

6

0.98

CSNK1A1L CK1\_CK1

-5 -4 -3 -2 -1 0 1 2 3 4 5

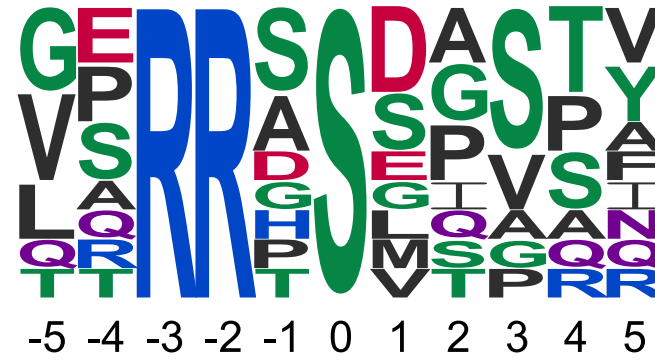

..RR.[ST]..... (10)

20

10/176

1

0.97

NTRK2 TK\_Trk

-5 -4 -3 -2 -1 0 1 2 3 4 5

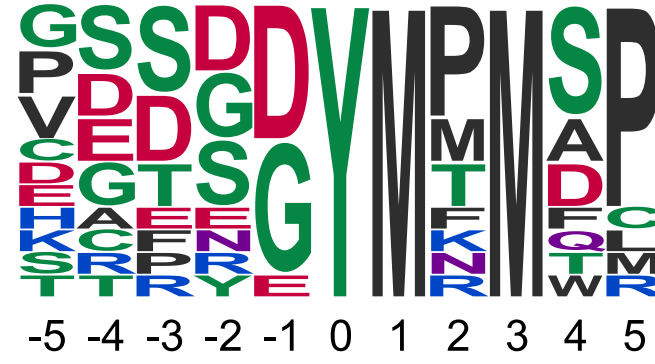

....YM.M.. (13)

47

13/296

11

0.97

MAST1 AGC\_MAST

-5 -4 -3 -2 -1 0 1 2 3 4 5

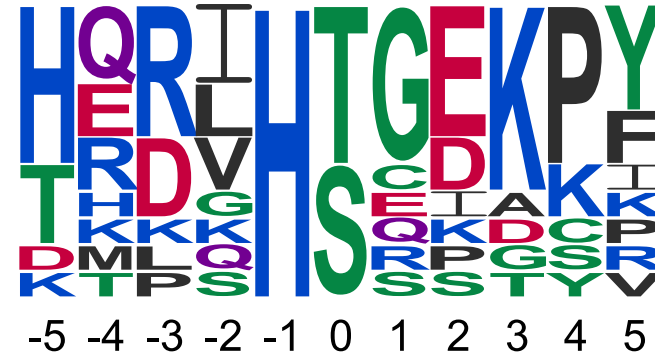

....H[ST]..... (11)

9

11/51

0

0.96

EPHA4 TK\_Eph

-5 -4 -3 -2 -1 0 1 2 3 4 5

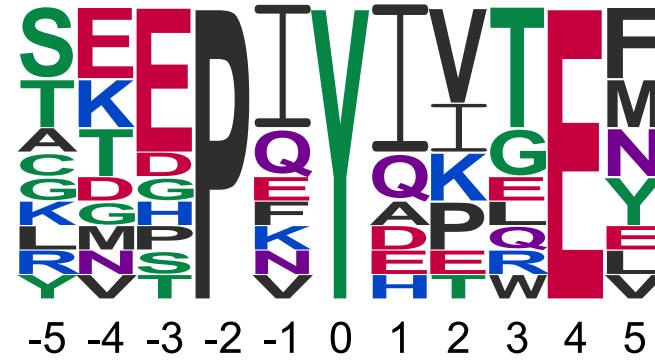

...P.Y...E. (12)

53

12/252

2

0.95

CLK4 CMGC\_CLK

-5 -4 -3 -2 -1 0 1 2 3 4 5

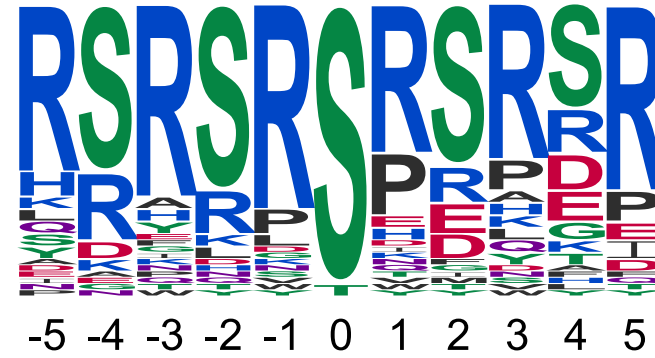

R.RS.[ST]..R.. (11)  
R.R.R[ST]..... (11)  
....R[ST]RS... (12)  
.S...[ST]....R (13)

10

47/156

1

0.92

STK38L AGC\_NDR

-5 -4 -3 -2 -1 0 1 2 3 4 5

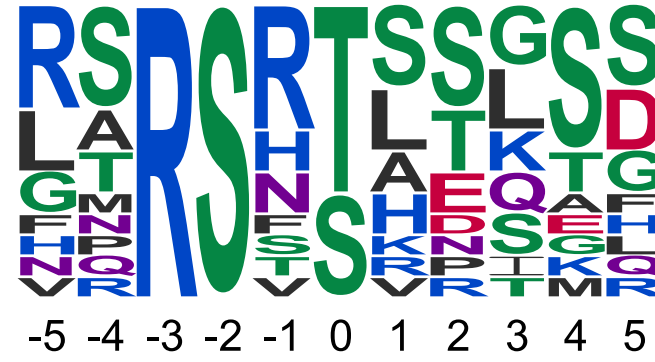

..RS.[ST]..... (14)

13

14/128

3

0.92

CDK9 CMGC\_CDK

-5 -4 -3 -2 -1 0 1 2 3 4 5

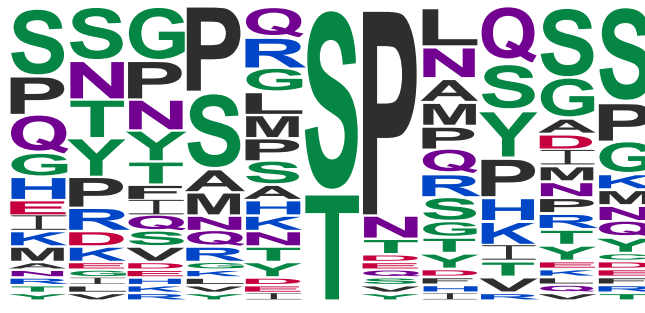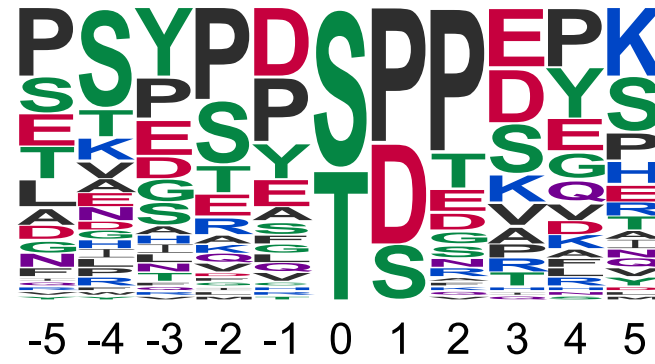

.S...[ST]D.E.. (11)  
.....[ST]P..PK (10)  
...D[ST]D.D.. (11)  
P.Y..[ST]SP... (12)  
...P.[ST]PP... (19)

198

63/2419

38

0.90

CDK1 CMGC\_CDK

-5 -4 -3 -2 -1 0 1 2 3 4 5

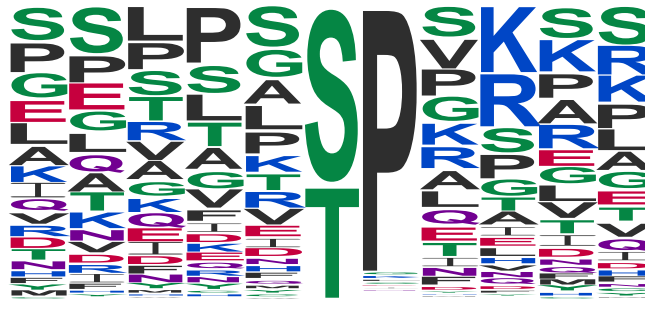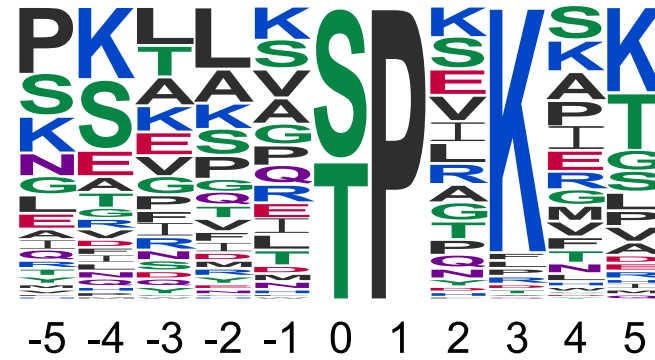

.K...[ST]P.K.. (28)  
P....[ST]P.K.. (24)  
...L.[ST]P.K.. (20)  
.....[ST]P.K.T (18)  
.S...[ST]P...K (22)

598

112/8698

401

0.88

ERN2 Other\_IRE

-5 -4 -3 -2 -1 0 1 2 3 4 5

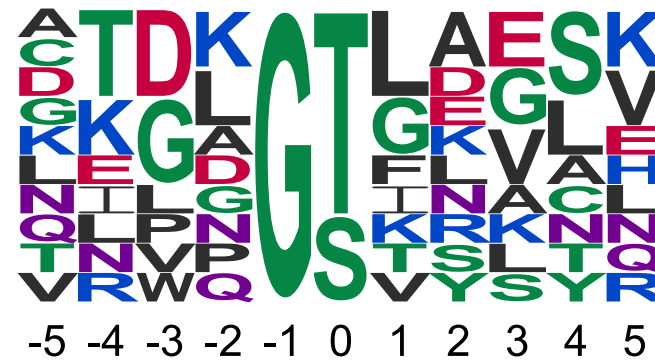

....G[ST]..... (10)

6

10/23

0

0.86

MAPK6 CMGC\_MAPK

-5 -4 -3 -2 -1 0 1 2 3 4 5

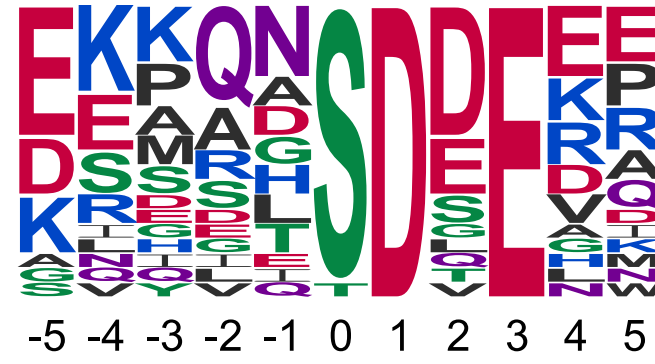

.....[ST]D.E... (20)

23

20/216

3

0.86

STRADA STE\_STE20

-5 -4 -3 -2 -1 0 1 2 3 4 5

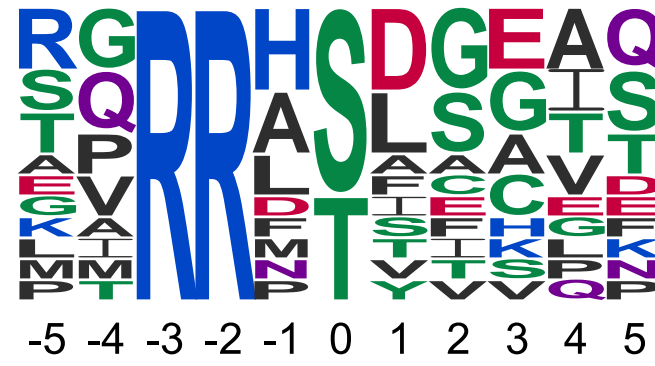

..RR.[ST]..... (14)

34

14/273

0

0.86

CDK8 CMGC\_CDK

-5 -4 -3 -2 -1 0 1 2 3 4 5

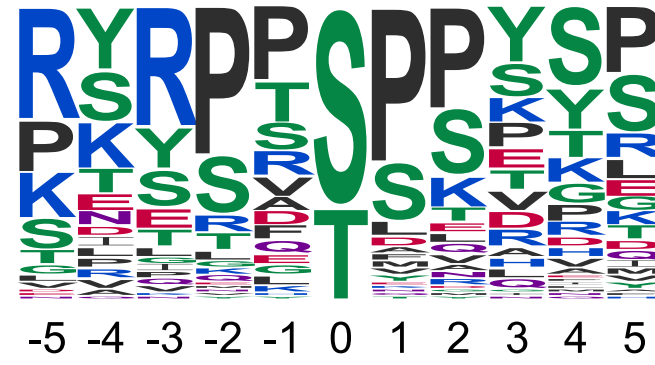

K..P.[ST]P.... (13)  
P.Y..[ST]SP... (12)  
...P.[ST]PP... (14)  
...P.[ST]P.Y.. (13)  
R.R..[ST]..... (27)

107

83/1600

9

0.85

CSNK2A1 CMGC\_CK2

-5 -4 -3 -2 -1 0 1 2 3 4 5

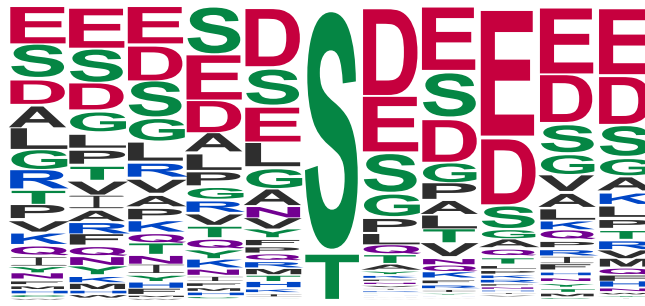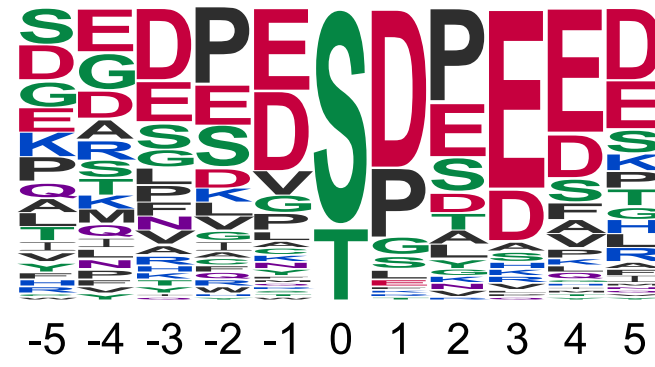

..D..[ST]D.E... (15)  
....D[ST]D.D.. (15)  
.....[ST]D.E.D (13)  
...P.[ST]PP... (20)  
....E[ST]...EE. (20)

265

84/3534

476

0.85

STRADB STE\_STE20

-5 -4 -3 -2 -1 0 1 2 3 4 5

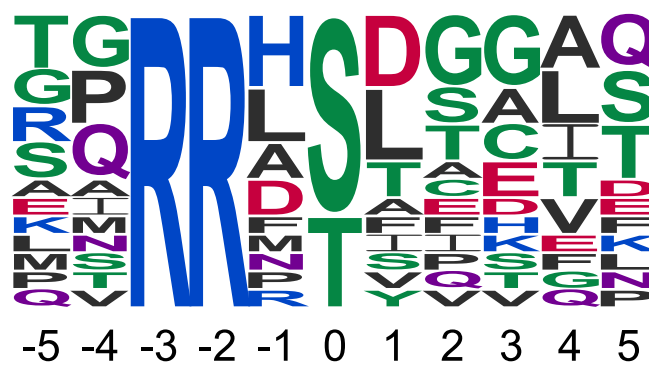

..RR.[ST]..... (16)

24

16/235

0

0.83

CDK12 CMGC\_CDK

-5 -4 -3 -2 -1 0 1 2 3 4 5

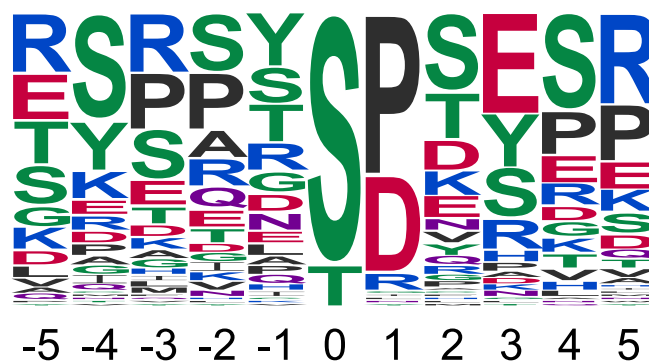

.S..Y[ST]P.... (15)  
...P.[ST]P.Y.. (16)  
.....[ST]D.E.. (31)  
.....[ST]P...R (20)  
R.R..[ST].S... (11)

28

93/557

5

0.82

CSNK2A2 CMGC\_CK2

-5 -4 -3 -2 -1 0 1 2 3 4 5

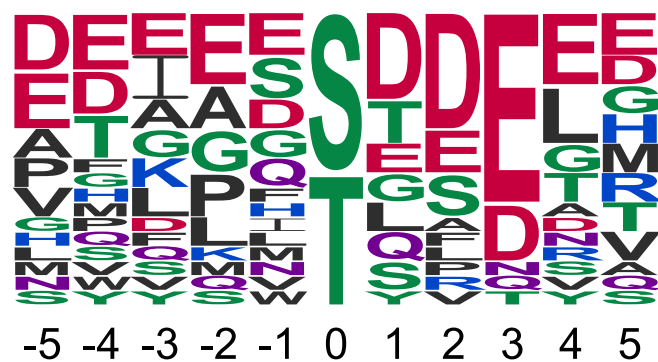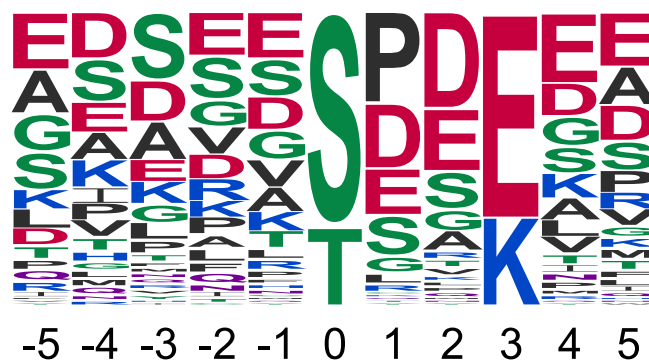

.S...[ST]D.E.. (11)  
..D..[ST]..EE. (13)  
..S...[ST]..EE.. (16)  
.....[ST].DE.. (35)  
.....[ST]P.K.. (32)

122

107/1694

20

0.82

EEF2K Atypical\_Alpha

-5 -4 -3 -2 -1 0 1 2 3 4 5

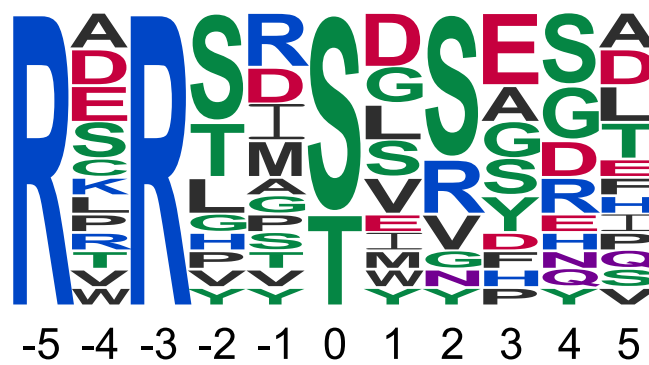

R.R..[ST]..... (16)

33

16/358

9

0.82

HIPK1 CMGC\_DYRK

-5 -4 -3 -2 -1 0 1 2 3 4 5

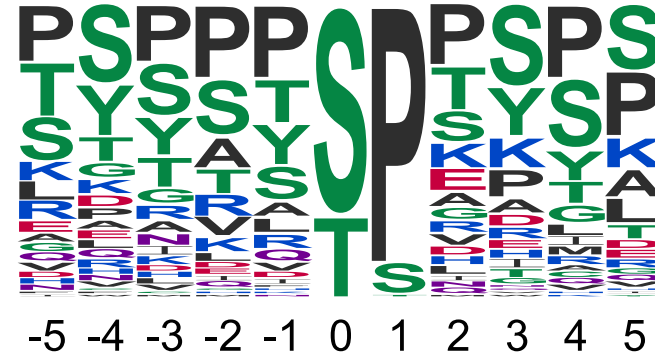

...P.[ST]P.Y.. (15)  
 ..P.Y[ST]P.... (13)  
 P.Y..[ST]....S (11)  
 .....[ST]P.... (52)

13 91/270 0 0.79

MAPK1 CMGC\_MAPK

-5 -4 -3 -2 -1 0 1 2 3 4 5

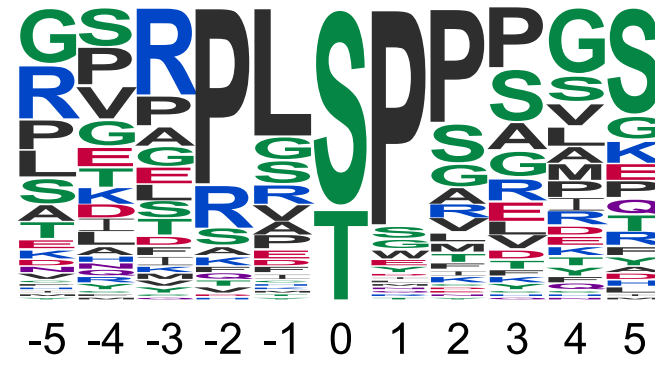

...P.[ST]PPP.. (11)  
 ...PL[ST]P.... (34)  
 G.RR.[ST]..... (11)  
 .....[ST]PP..S (19)  
 R.R..[ST]...G. (10)

491 86/5374 354 0.79

CDK2 CMGC\_CDK

-5 -4 -3 -2 -1 0 1 2 3 4 5

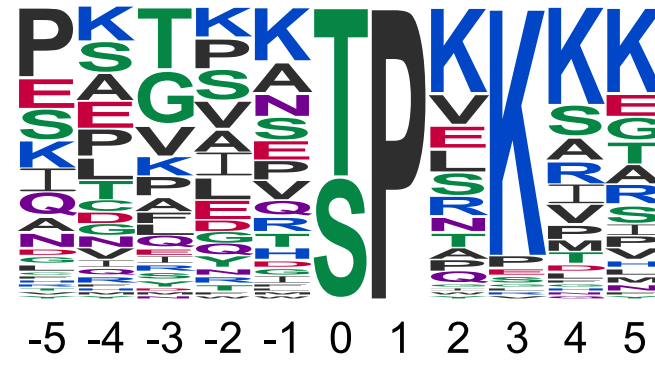

.....[ST]PKK.. (21)  
 P....[ST]P.K.. (15)  
 ..T..[ST]P.K.. (13)  
 ..G..[ST]P.K.. (11)  
 .....[ST]P..KK (14)

434 74/5489 546 0.78

CDK5 CMGC\_CDK

-5 -4 -3 -2 -1 0 1 2 3 4 5

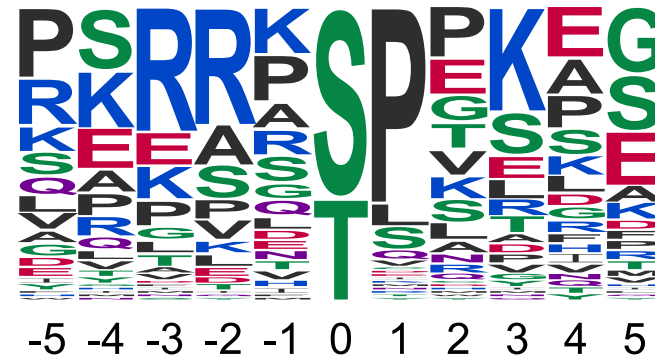

P....[ST]P.K.. (18)  
 .K...[ST]P.K.. (10)  
 .....[ST]PP..S (10)  
 .S...[ST]P...G (15)  
 ..RR.[ST]..... (29)

164 87/2021 120 0.78

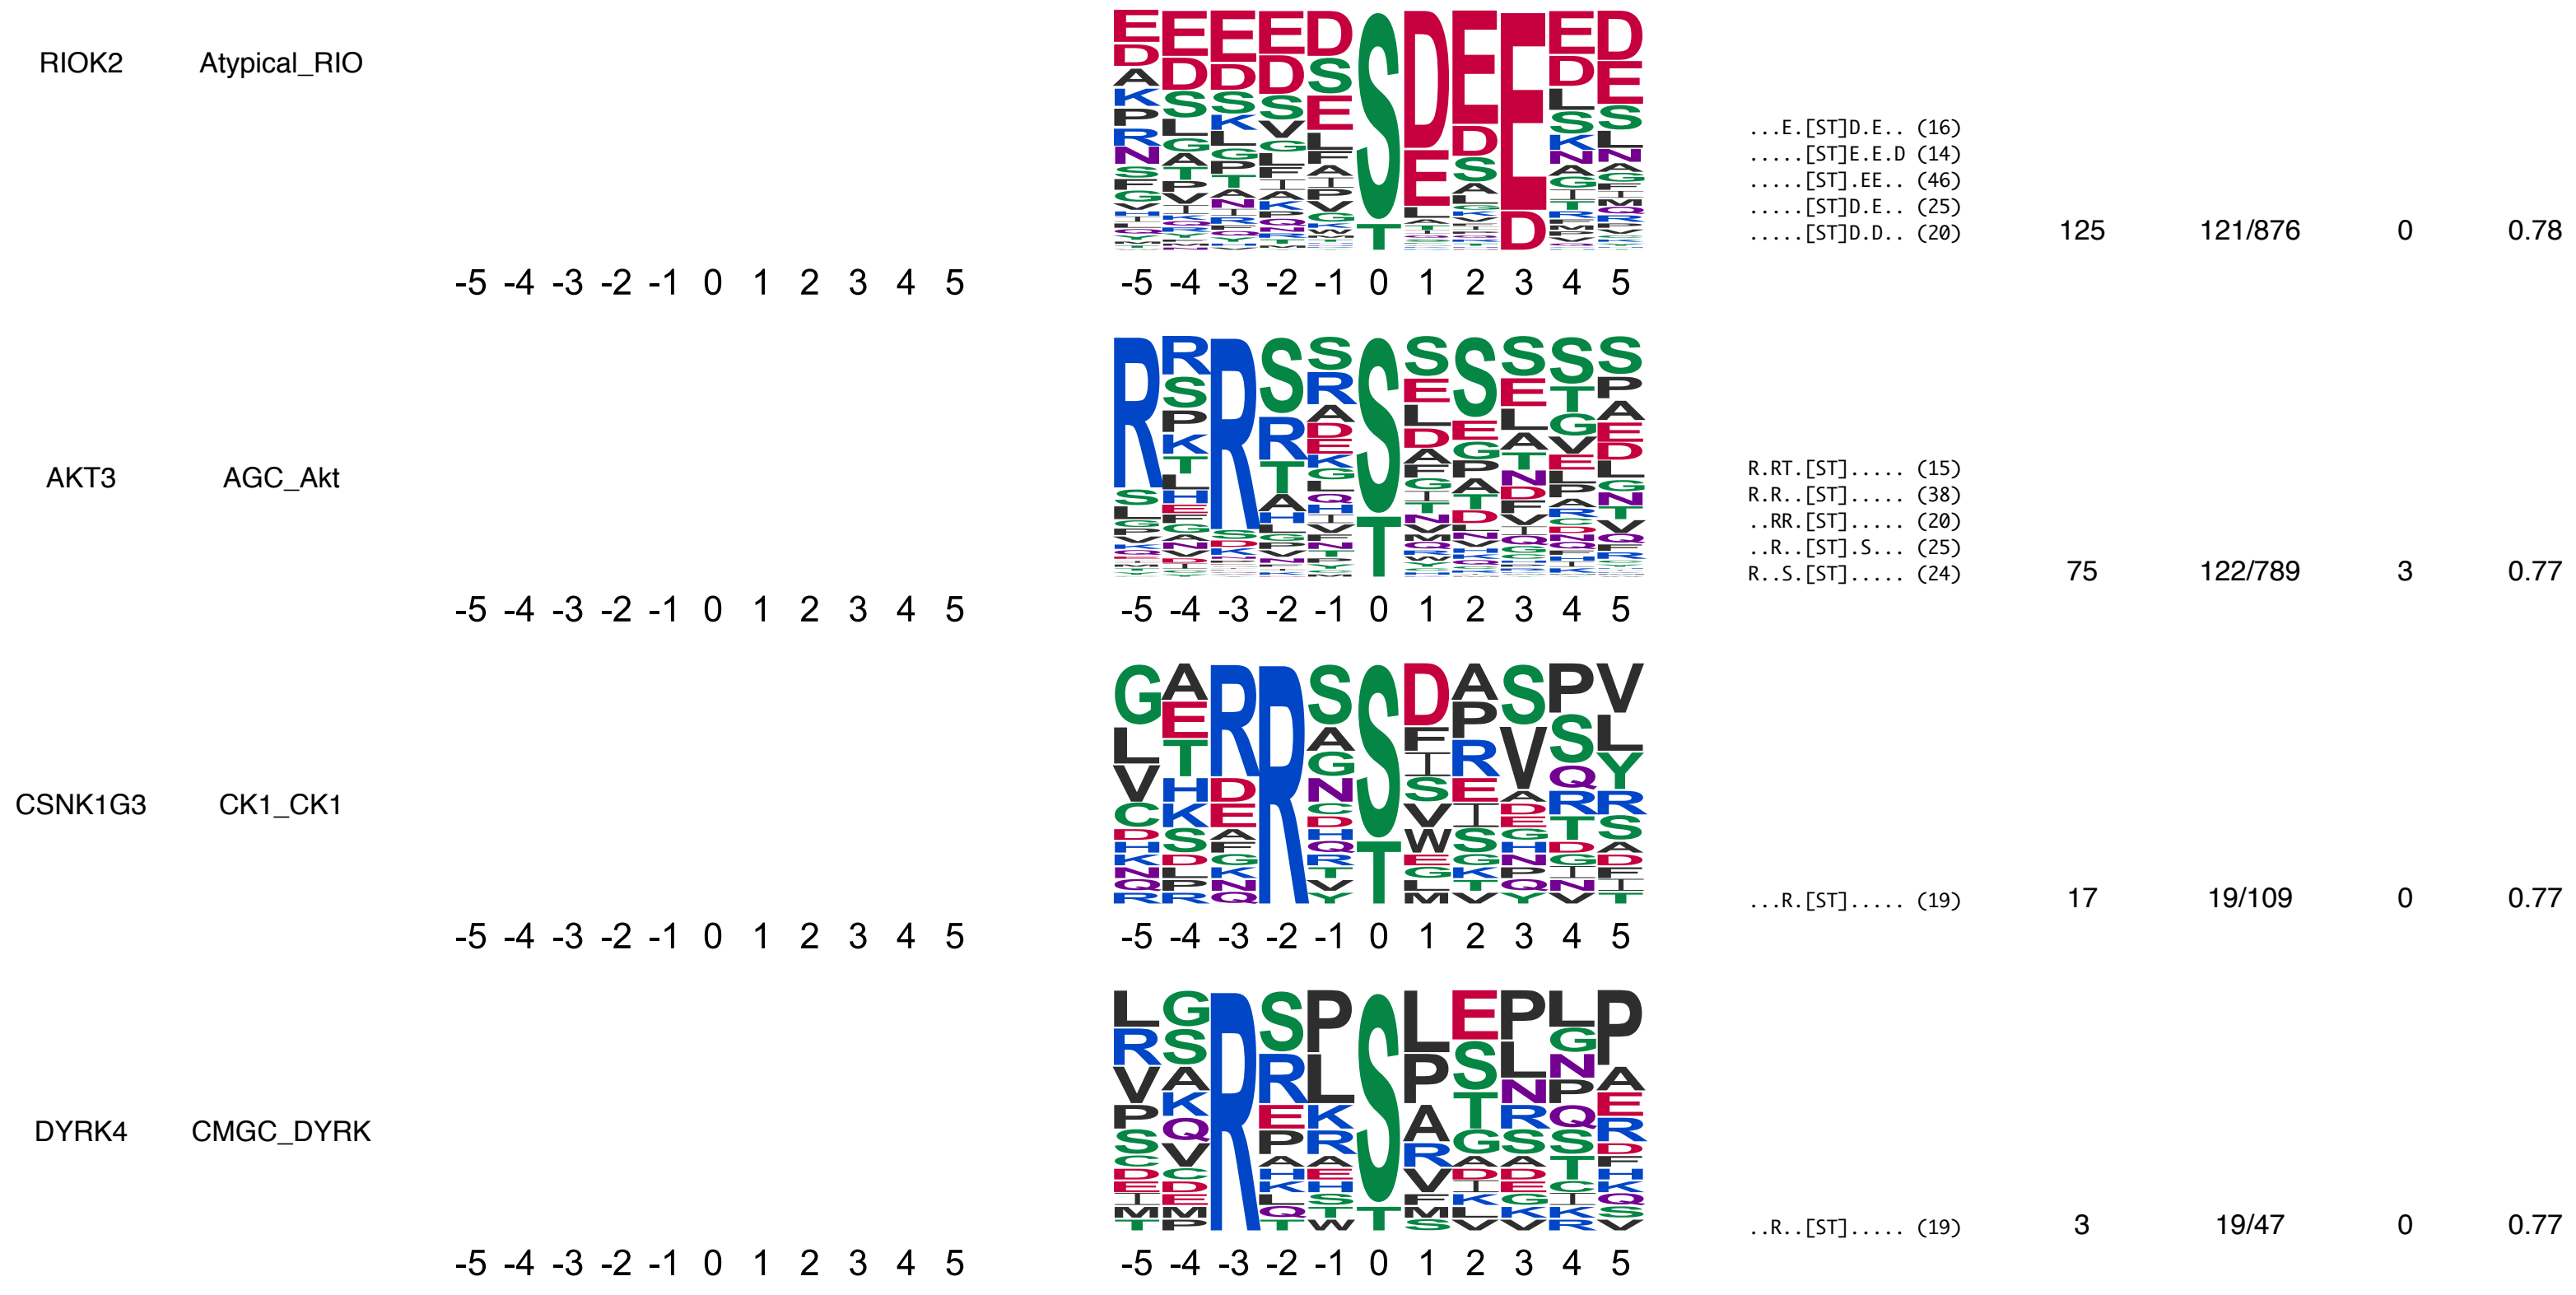



GUCY2F RGC\_RGC

-5 -4 -3 -2 -1 0 1 2 3 4 5

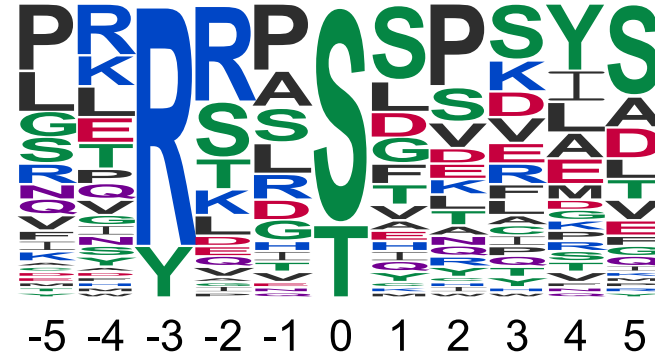

....P[ST]...YS (10)  
..RR.[ST]..... (19)  
..R..[ST]..... (28)

61 57/223 0 0.77

NPR2 RGC\_RGC

-5 -4 -3 -2 -1 0 1 2 3 4 5

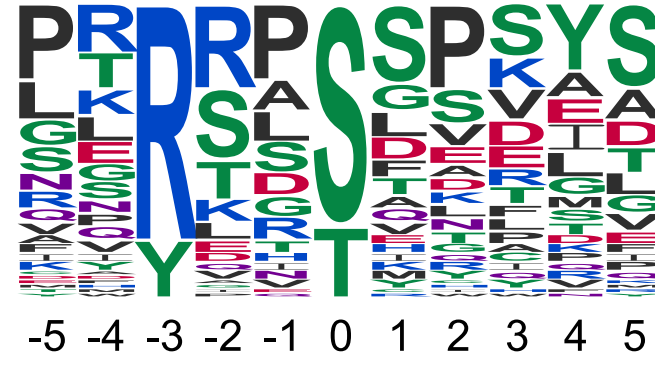

P.Y..[ST].P... (13)  
..RR.[ST]..... (19)  
..R..[ST]..... (34)

57 66/248 0 0.77

RIOK3 Atypical RIO

-5 -4 -3 -2 -1 0 1 2 3 4 5

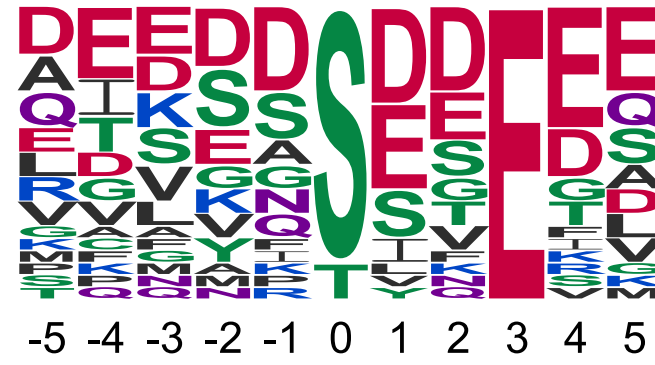

.....[ST]...E.. (24)

13 24/103 0 0.77

TIE1 TK\_Tie

-5 -4 -3 -2 -1 0 1 2 3 4 5

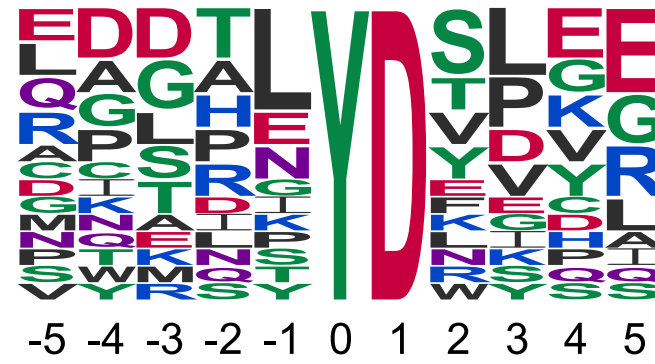

.....YD..... (17)

37 17/89 0 0.77

CDK11A CMGC\_CDK

-5 -4 -3 -2 -1 0 1 2 3 4 5

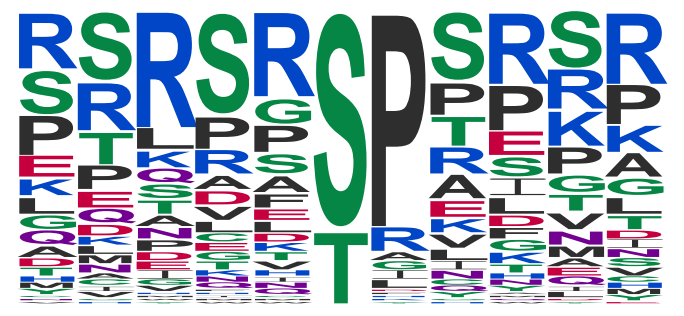

-5 -4 -3 -2 -1 0 1 2 3 4 5

R.RS.[ST]...R (11)  
..R.R[ST]..... (18)  
.....[ST]P.... (66)

35 95/425 0 0.76

DYRK1A CMGC\_DYRK

-5 -4 -3 -2 -1 0 1 2 3 4 5

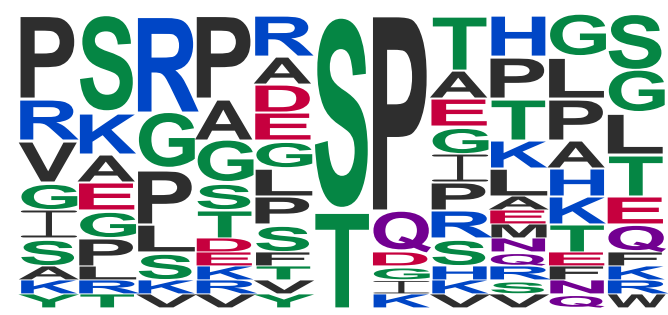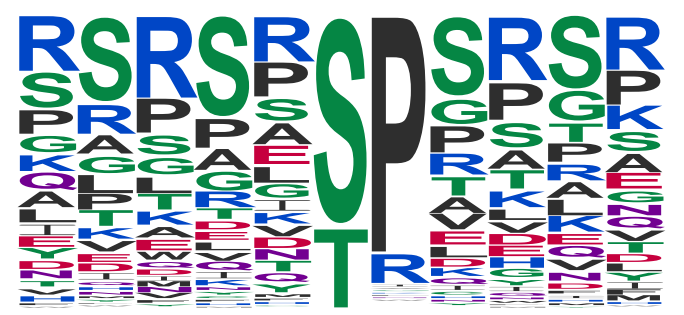

-5 -4 -3 -2 -1 0 1 2 3 4 5

...S.[ST]RSRS. ( 18)  
R.RS.[ST]...R ( 12)  
.SRS.[ST]P.... ( 10)  
..RS.[ST].S... ( 18)  
.....[ST]P.... (194)

56 252/673 21 0.76

MAPK15 CMGC\_MAPK

-5 -4 -3 -2 -1 0 1 2 3 4 5

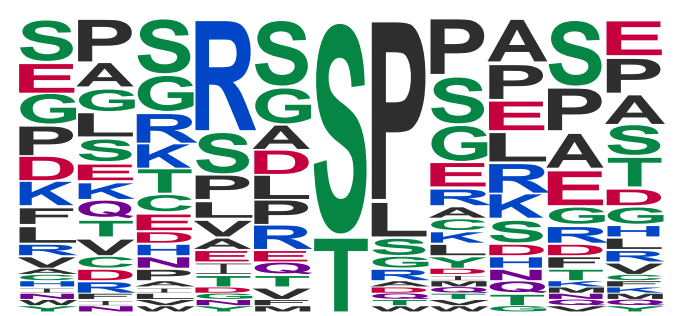

-5 -4 -3 -2 -1 0 1 2 3 4 5

.....[ST]P.... (29)  
...R.[ST]..... (18)

7 47/119 10 0.76

NRBP1 Other\_NRBP

-5 -4 -3 -2 -1 0 1 2 3 4 5

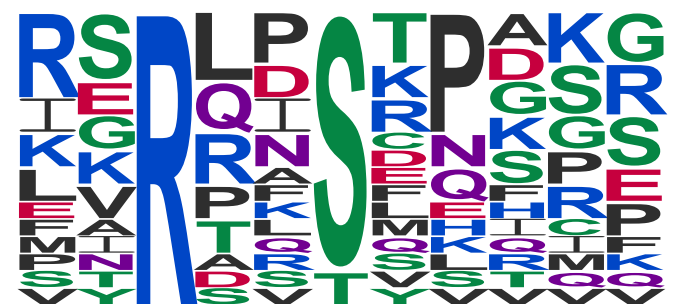

-5 -4 -3 -2 -1 0 1 2 3 4 5

..R..[ST]..... (17)

33 17/83 0 0.76

ULK3 Other\_ULK

-5 -4 -3 -2 -1 0 1 2 3 4 5

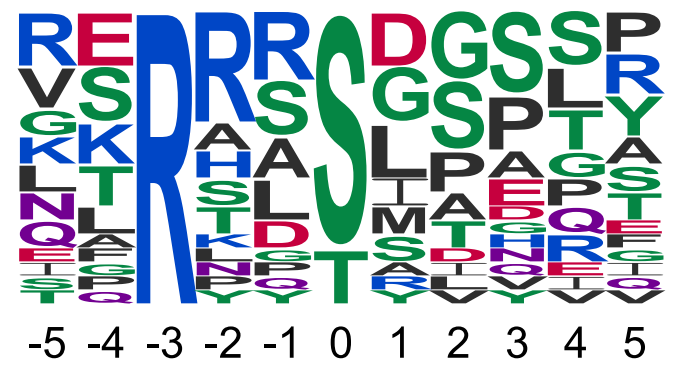

..R..[ST]..... (21)

6

21/84

4

0.76

CDC7 Other\_CDC7

-5 -4 -3 -2 -1 0 1 2 3 4 5

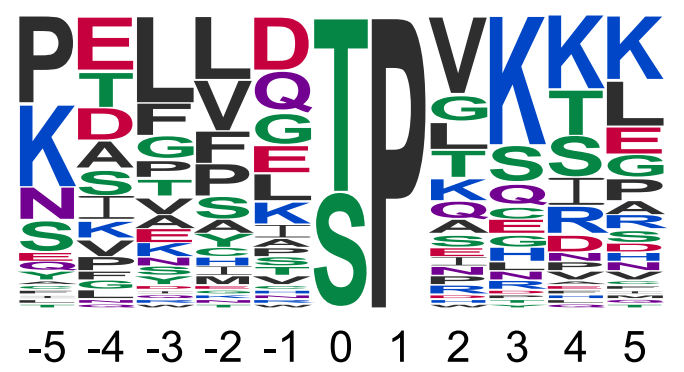

P...[ST]P.K.. (13)  
 ...L.[ST]P.K.. (12)  
 ...D[ST]P...K (10)  
 .....[ST]PV.K. (11)  
 K.L..[ST]P.... (14)

225

63/3690

10

0.75

CDK13 CMGC\_CDK

-5 -4 -3 -2 -1 0 1 2 3 4 5

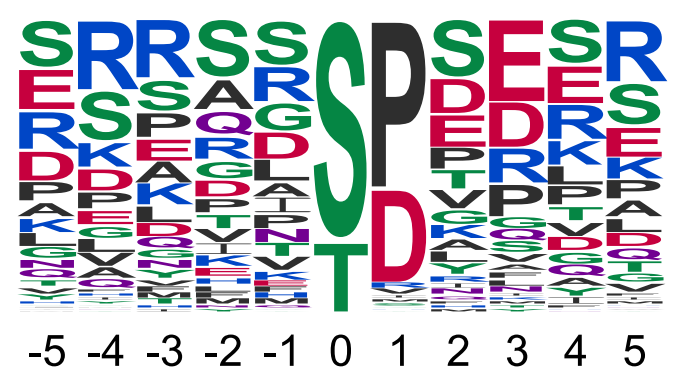

.....[ST]D.E.. (31)  
 .RR..[ST]..... (21)  
 .....[ST]P...R (20)  
 .....[ST]D.D.. (16)  
 .....[ST]P.... (57)

54

148/543

0

0.75

CHEK1 CAMK\_CAMKL

-5 -4 -3 -2 -1 0 1 2 3 4 5

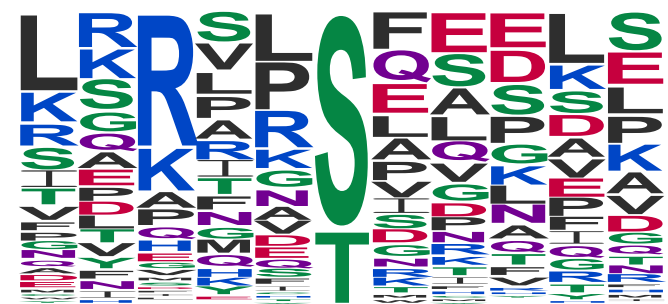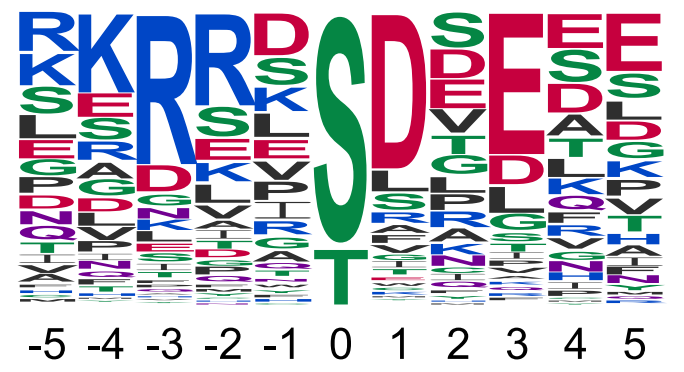

..D..[ST]D.E.. (16)  
 ..RR.[ST]..... (61)  
 ....D[ST]D.D.. (12)  
 .....[ST]D.E.. (76)  
 .KR..[ST]..... (38)

353

205/4368

170

0.75

SIK3 CAMK\_CAMKL

-5 -4 -3 -2 -1 0 1 2 3 4 5

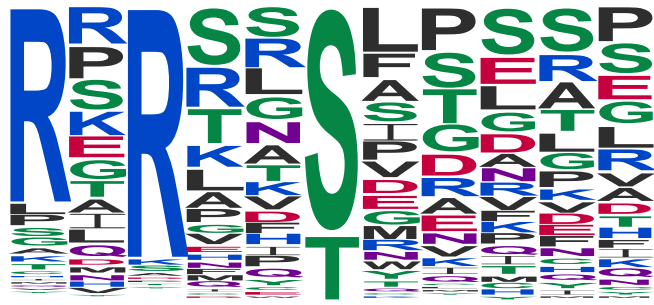

-5 -4 -3 -2 -1 0 1 2 3 4 5

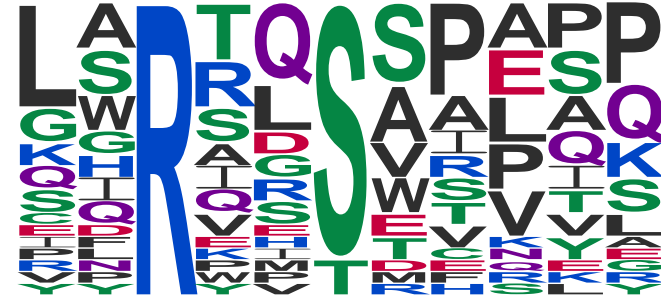

-5 -4 -3 -2 -1 0 1 2 3 4 5

..R..[ST]..... (25)

17

25/131

1

0.75

AKT1 AGC\_Akt

-5 -4 -3 -2 -1 0 1 2 3 4 5



-5 -4 -3 -2 -1 0 1 2 3 4 5

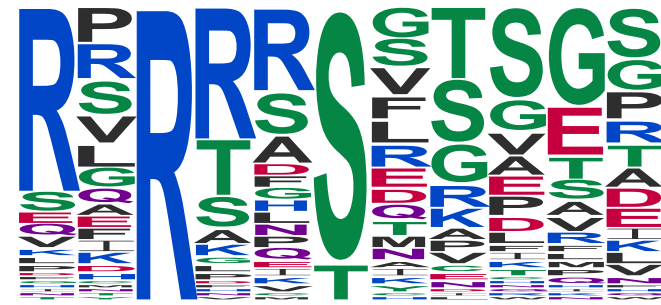

-5 -4 -3 -2 -1 0 1 2 3 4 5

R.RT.[ST]...S... (12)  
 R.R..[ST]...G. (21)  
 R.R..[ST]...E. (10)  
 ..RRR[ST]..... (17)  
 ..RR.[ST].T... (13)

735

73/6725

186

0.74

BUB1 Other\_BUB

-5 -4 -3 -2 -1 0 1 2 3 4 5

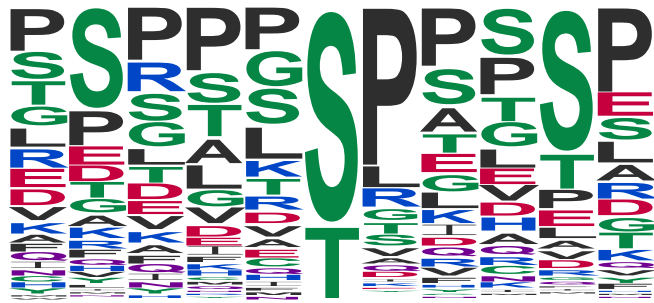

-5 -4 -3 -2 -1 0 1 2 3 4 5

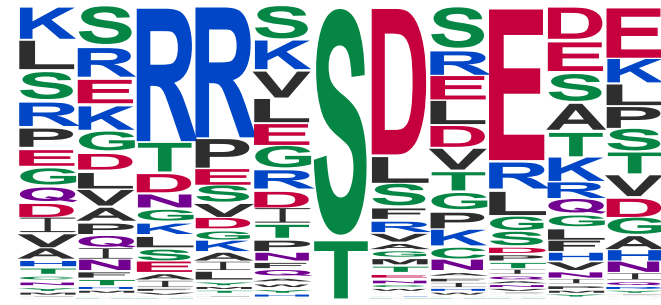

-5 -4 -3 -2 -1 0 1 2 3 4 5

..RR.[ST]...T. (10)  
 .....[ST]D.ED. (14)  
 ..RR.[ST]..... (58)  
 ..TP.[ST]..R.. (11)  
 .....[ST]D.E.. (62)

335

155/3960

7

0.74

GSK3B CMGC\_GSK

-5 -4 -3 -2 -1 0 1 2 3 4 5



-5 -4 -3 -2 -1 0 1 2 3 4 5

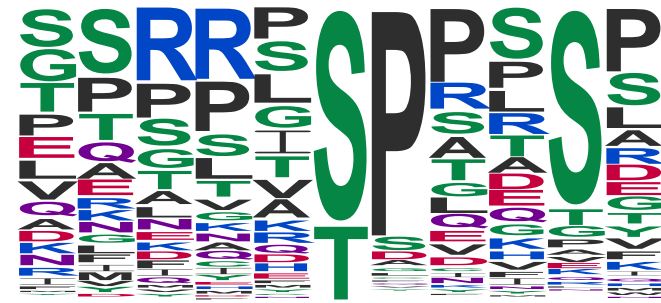

-5 -4 -3 -2 -1 0 1 2 3 4 5

....I[ST]PP... ( 14)  
 ..RR.[ST]...T. ( 10)  
 ...P.[ST]PP... ( 14)  
 .....[ST]P...S. (126)  
 ..RR.[ST]..... ( 33)

201

197/2679

196

0.74

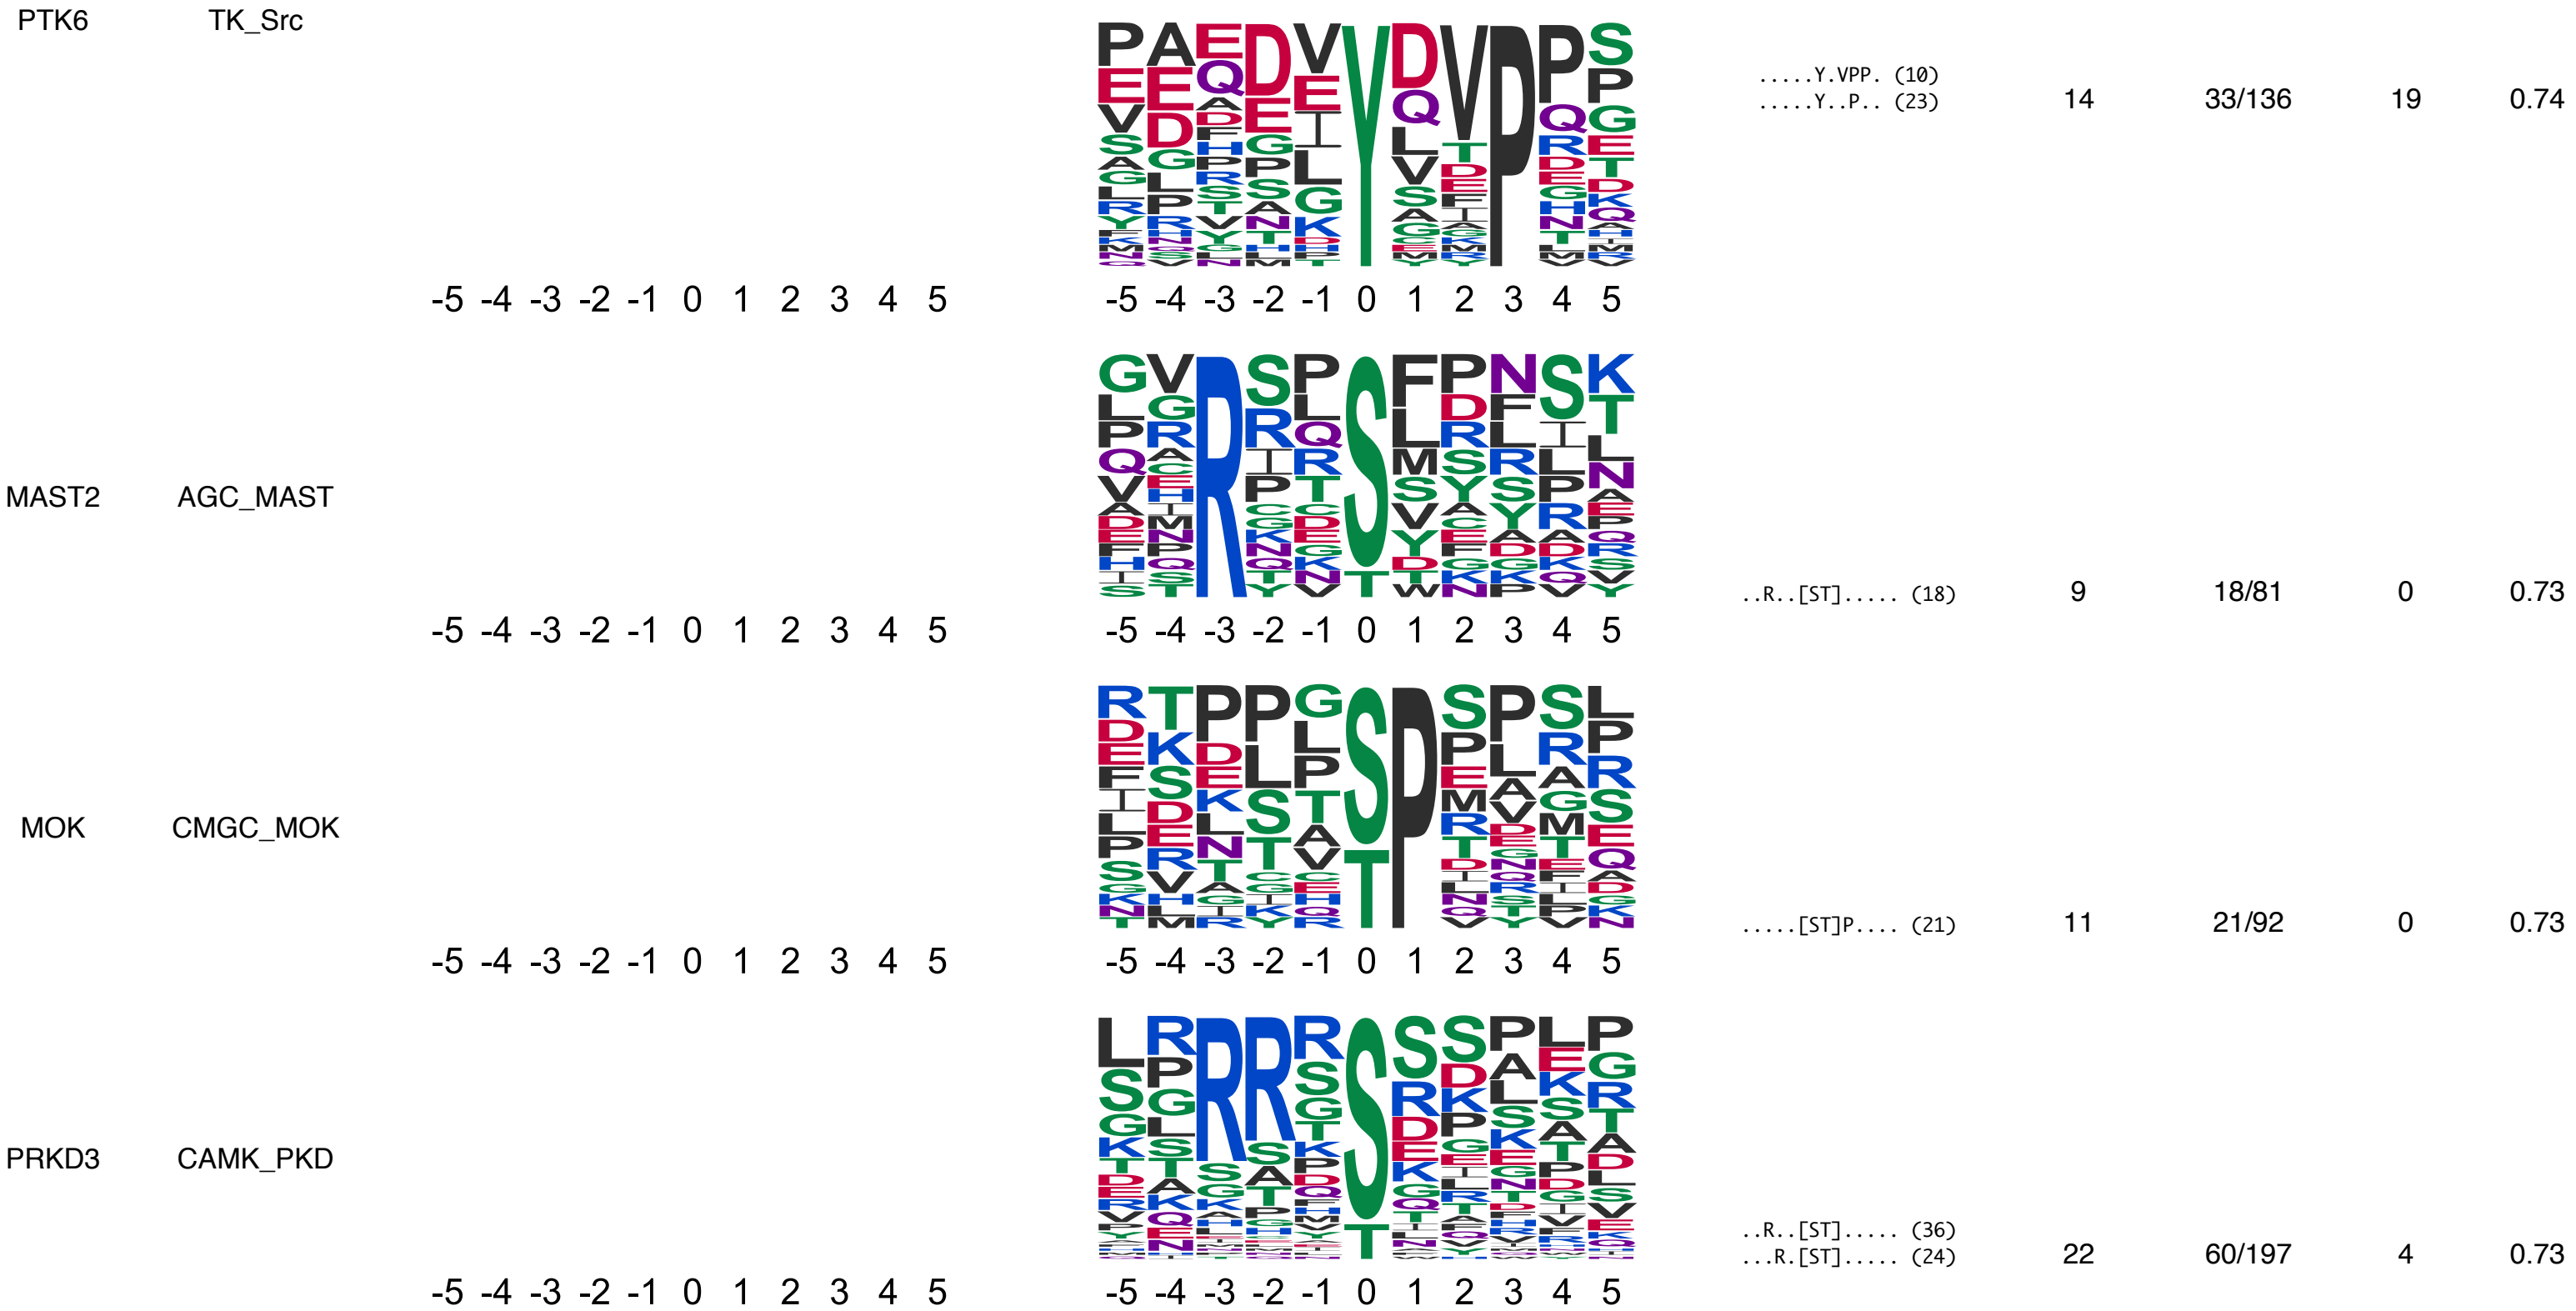

PRPF4B CMGC\_DYRK

-5 -4 -3 -2 -1 0 1 2 3 4 5

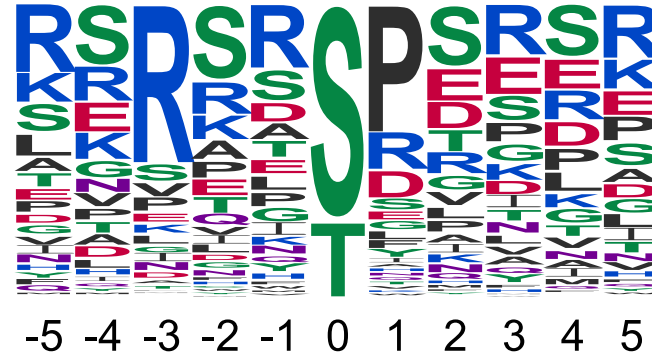

R..RS.[ST]..R.. ( 20)  
 ..R.R[ST]..... ( 37)  
 .....[ST]D.E.. ( 22)  
 .....[ST]P..... (112)  
 ..R..[ST]..... ( 76)

41 267/924 1 0.73

STK36 Other\_ULK

-5 -4 -3 -2 -1 0 1 2 3 4 5

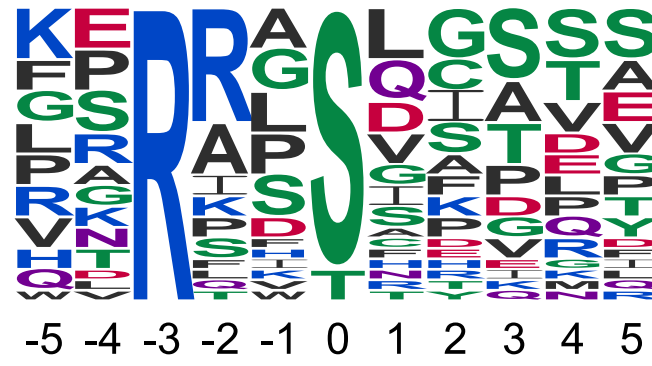

..RR.[ST]..... (11)  
 ..R..[ST]..... (17)

20 28/93 0 0.73

AURKB Other\_Aur

-5 -4 -3 -2 -1 0 1 2 3 4 5

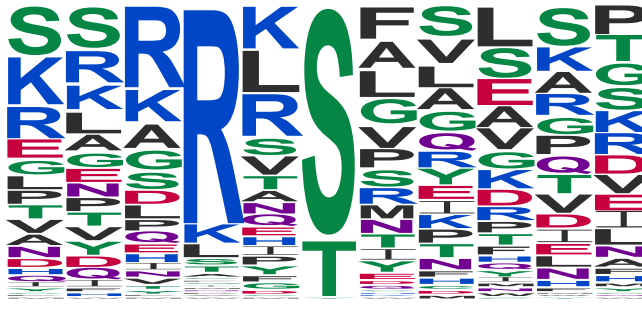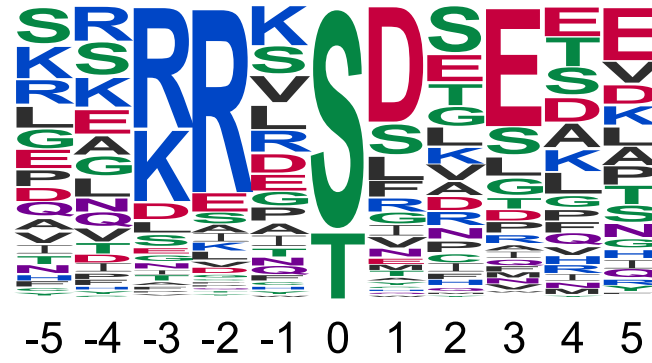

..RR.[ST]...T. (13)  
 .....[ST]D.ED. (13)  
 ..RR.[ST]..... (65)  
 ..KR.[ST]..... (45)  
 .....[ST]D.E.. (54)

366 196/4072 121 0.72

CDK14 CMGC\_CDK

-5 -4 -3 -2 -1 0 1 2 3 4 5

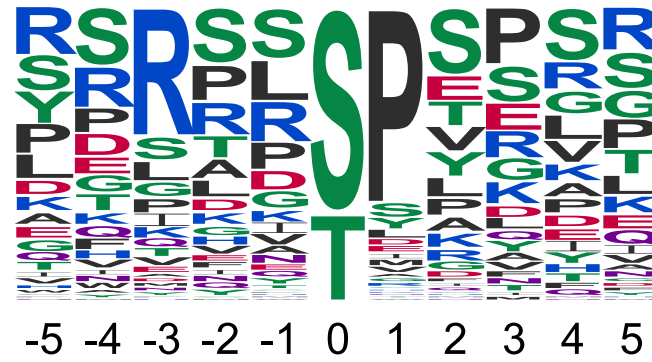

.....[ST]P..... (85)  
 ..R..[ST]..... (43)

24 128/359 0 0.72

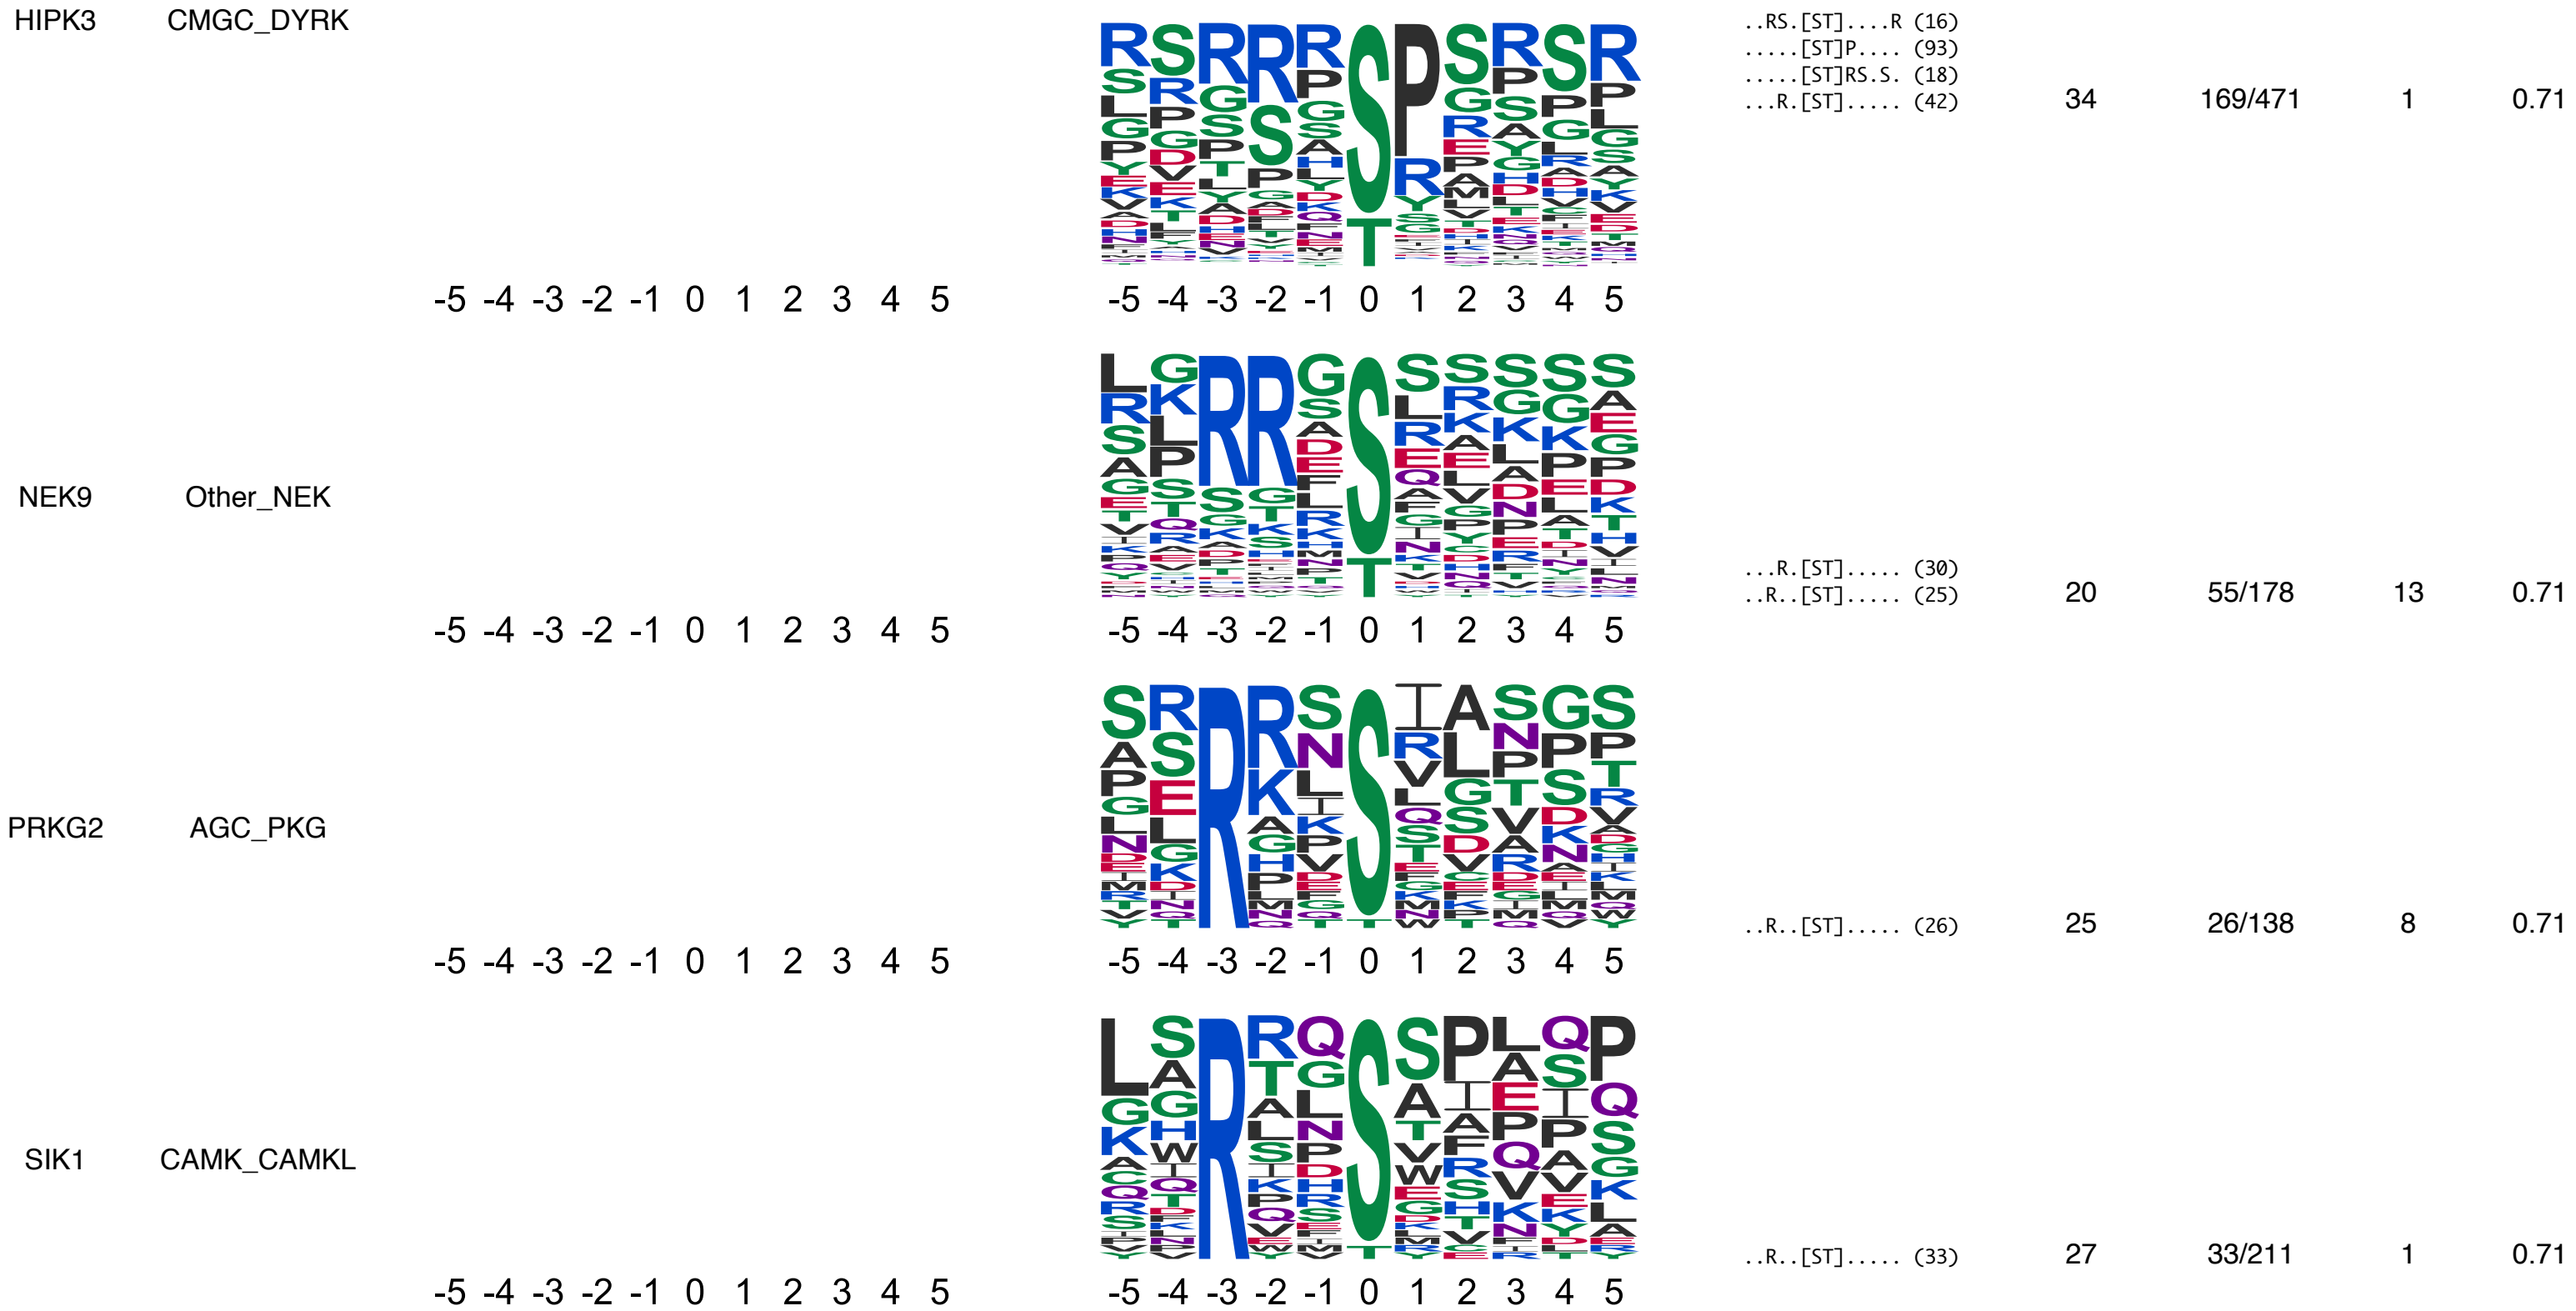

STK38 AGC\_NDR

-5 -4 -3 -2 -1 0 1 2 3 4 5

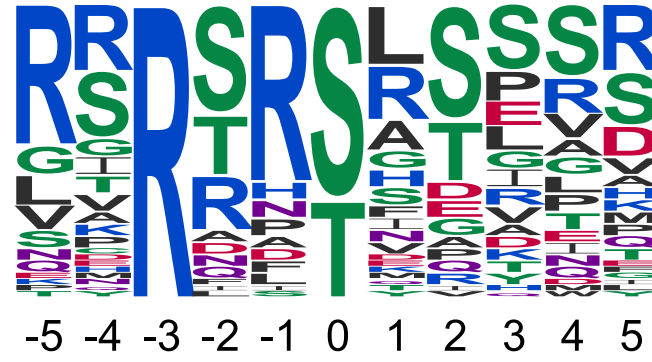

..R.R[ST]..... (29)  
R.R..[ST]..... (19)

111

48/792

4

0.71

WNK2 Other\_WNK

-5 -4 -3 -2 -1 0 1 2 3 4 5

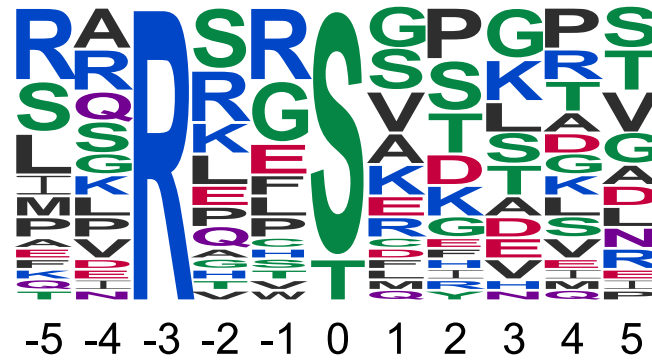

..R..[ST]..... (28)

12

28/133

0

0.71

CDK7 CMGC\_CDK

-5 -4 -3 -2 -1 0 1 2 3 4 5

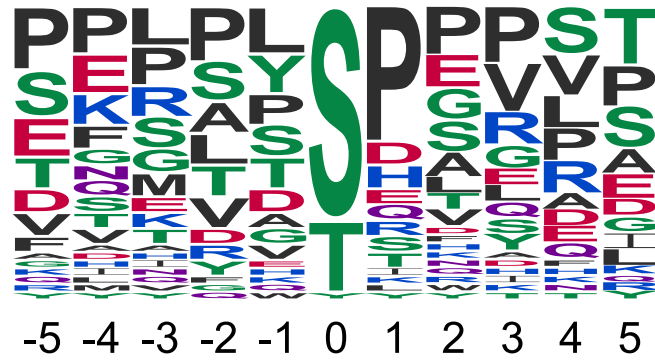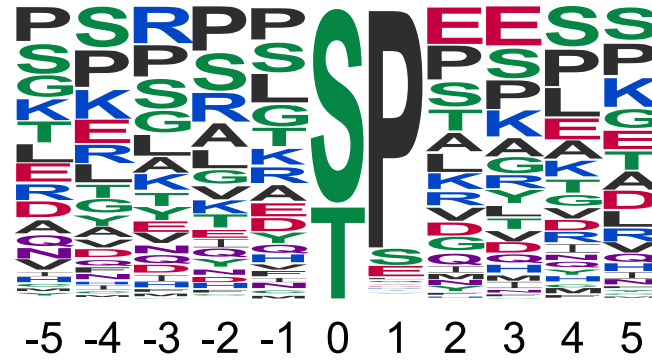

.....[ST]P..PK ( 11)  
....P[ST]...YS ( 10)  
..RR.[ST]..... ( 24)  
.....[ST]P..... (317)  
.....[ST].EE... ( 35)

132

397/1373

37

0.70

CLK2 CMGC\_CLK

-5 -4 -3 -2 -1 0 1 2 3 4 5

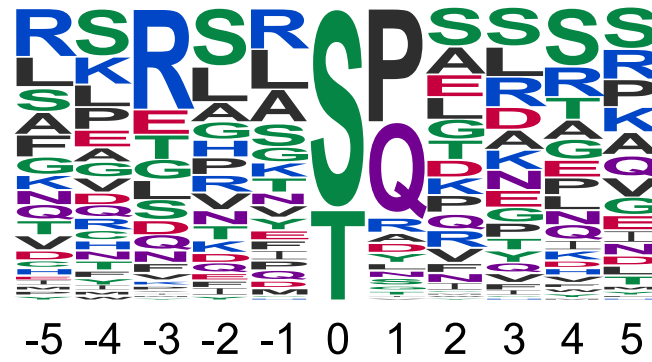

.....[ST]Q.... (38)  
.....[ST]P.... (46)  
..R..[ST]..... (33)

23

117/315

3

0.70



EIF2AK1 Other\_PEK

-5 -4 -3 -2 -1 0 1 2 3 4 5

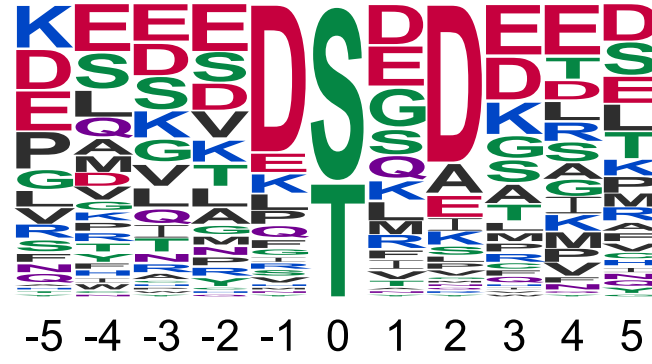

.....[ST].D... (46)  
.....D[ST]..... (39)

53 85/389 2 0.70

EIF2AK4 Other\_PEK

-5 -4 -3 -2 -1 0 1 2 3 4 5

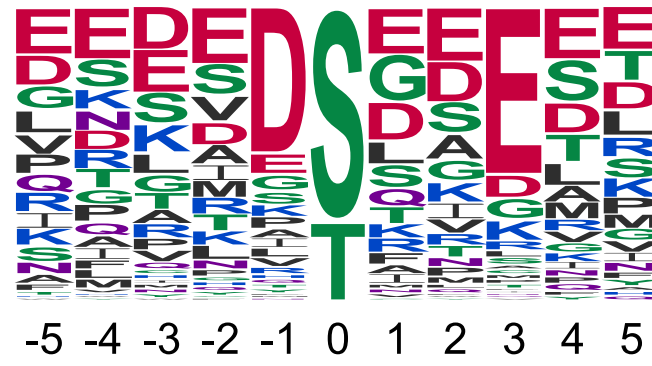

.....D[ST]..... (61)  
.....[ST]...E.. (62)

47 123/509 3 0.70

MUSK TK\_Musk

-5 -4 -3 -2 -1 0 1 2 3 4 5

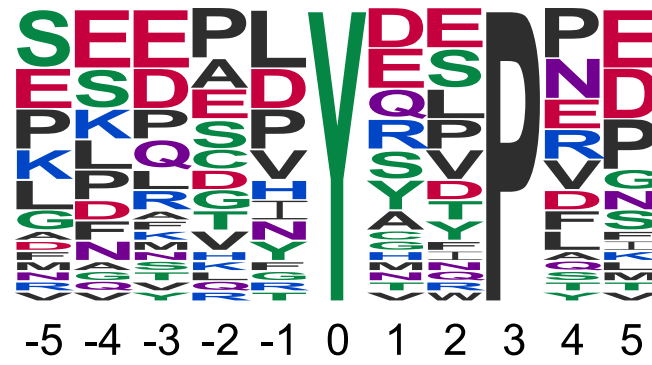

.....Y..P... (29)

51 29/190 0 0.70

OXSRI STE\_STE20

-5 -4 -3 -2 -1 0 1 2 3 4 5

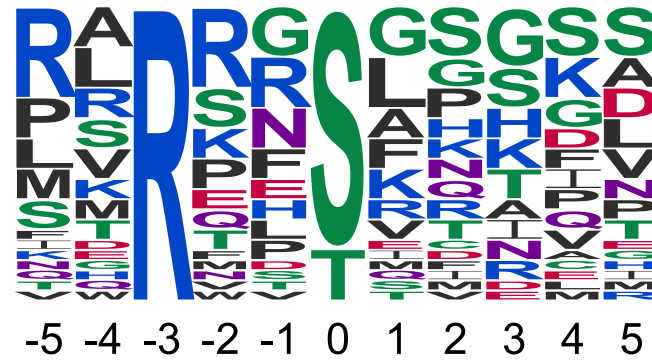

..R..[ST]..... (29)

21 29/165 14 0.70

RIOK1 Atypical\_RIO

-5 -4 -3 -2 -1 0 1 2 3 4 5

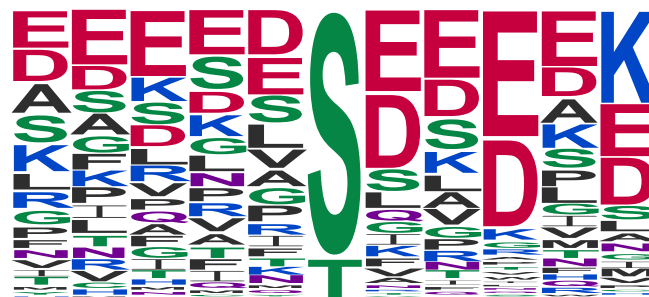

-5 -4 -3 -2 -1 0 1 2 3 4 5

.E...[ST]E.E.. (11)  
 .....[ST]D.E.. (32)  
 .....[ST]E.E.. (28)  
 .....[ST]...D.. (54)  
 .....[ST]....K (51)

60 176/521 0 0.70

TNIK STE\_STE20

-5 -4 -3 -2 -1 0 1 2 3 4 5

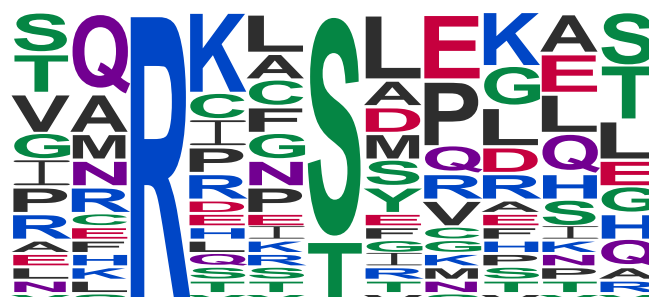

-5 -4 -3 -2 -1 0 1 2 3 4 5

..R..[ST]..... (22)

14 22/116 4 0.70

TRIO CAMK\_Trio

-5 -4 -3 -2 -1 0 1 2 3 4 5

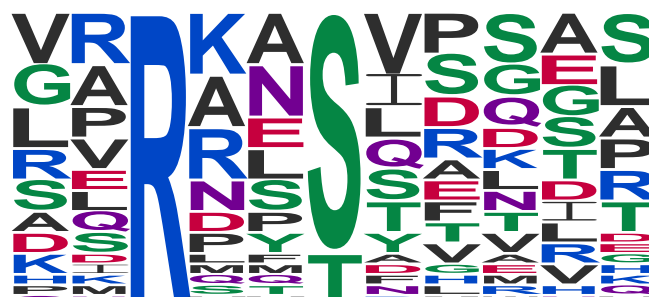

-5 -4 -3 -2 -1 0 1 2 3 4 5

..R..[ST]..... (28)

18 28/162 0 0.70

AAK1 Other\_NAK

-5 -4 -3 -2 -1 0 1 2 3 4 5

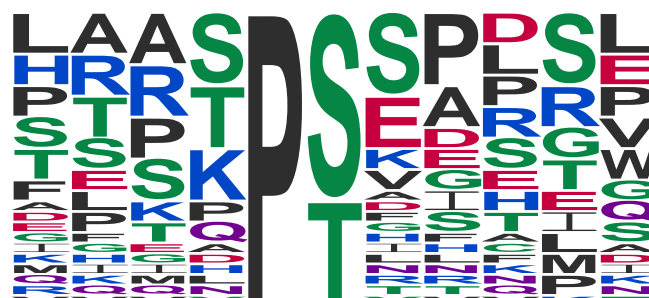

-5 -4 -3 -2 -1 0 1 2 3 4 5

....P[ST]..... (28)

15 28/144 3 0.69

LRRK1 TKL\_LRRK

-5 -4 -3 -2 -1 0 1 2 3 4 5

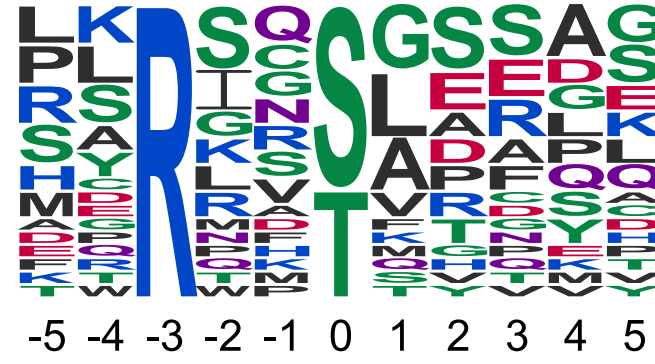

..R..[ST]..... (22)

7

22/101

0

0.69

MAP2K7 STE\_STE7

-5 -4 -3 -2 -1 0 1 2 3 4 5

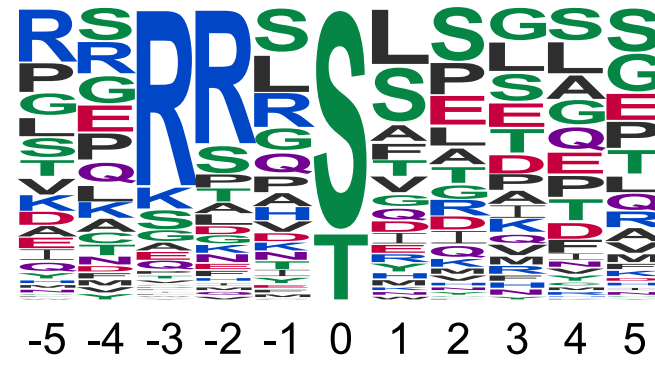

..R..[ST]..... (77)

...R.[ST]..... (49)

62

126/537

6

0.69

MAP3K11 TKL\_MLK

-5 -4 -3 -2 -1 0 1 2 3 4 5

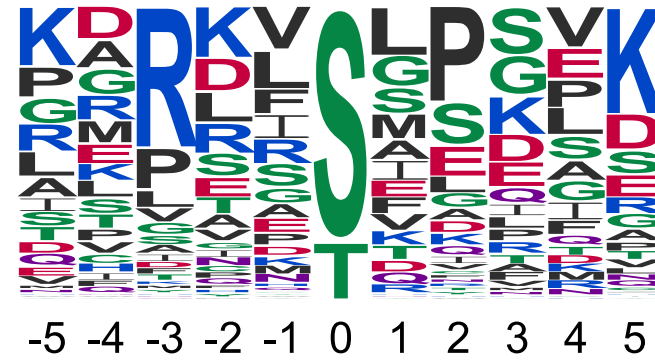

....V[ST].P.V. (12)

K..K.[ST].P... (13)

..R..[ST]..... (68)

.....[ST]....K (48)

53

141/503

7

0.69

MARK3 CAMK\_CAMKL

-5 -4 -3 -2 -1 0 1 2 3 4 5

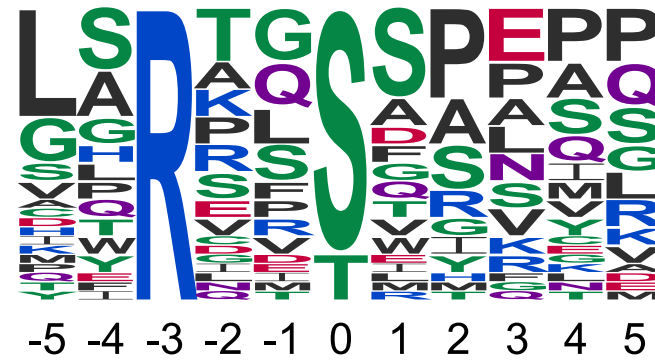

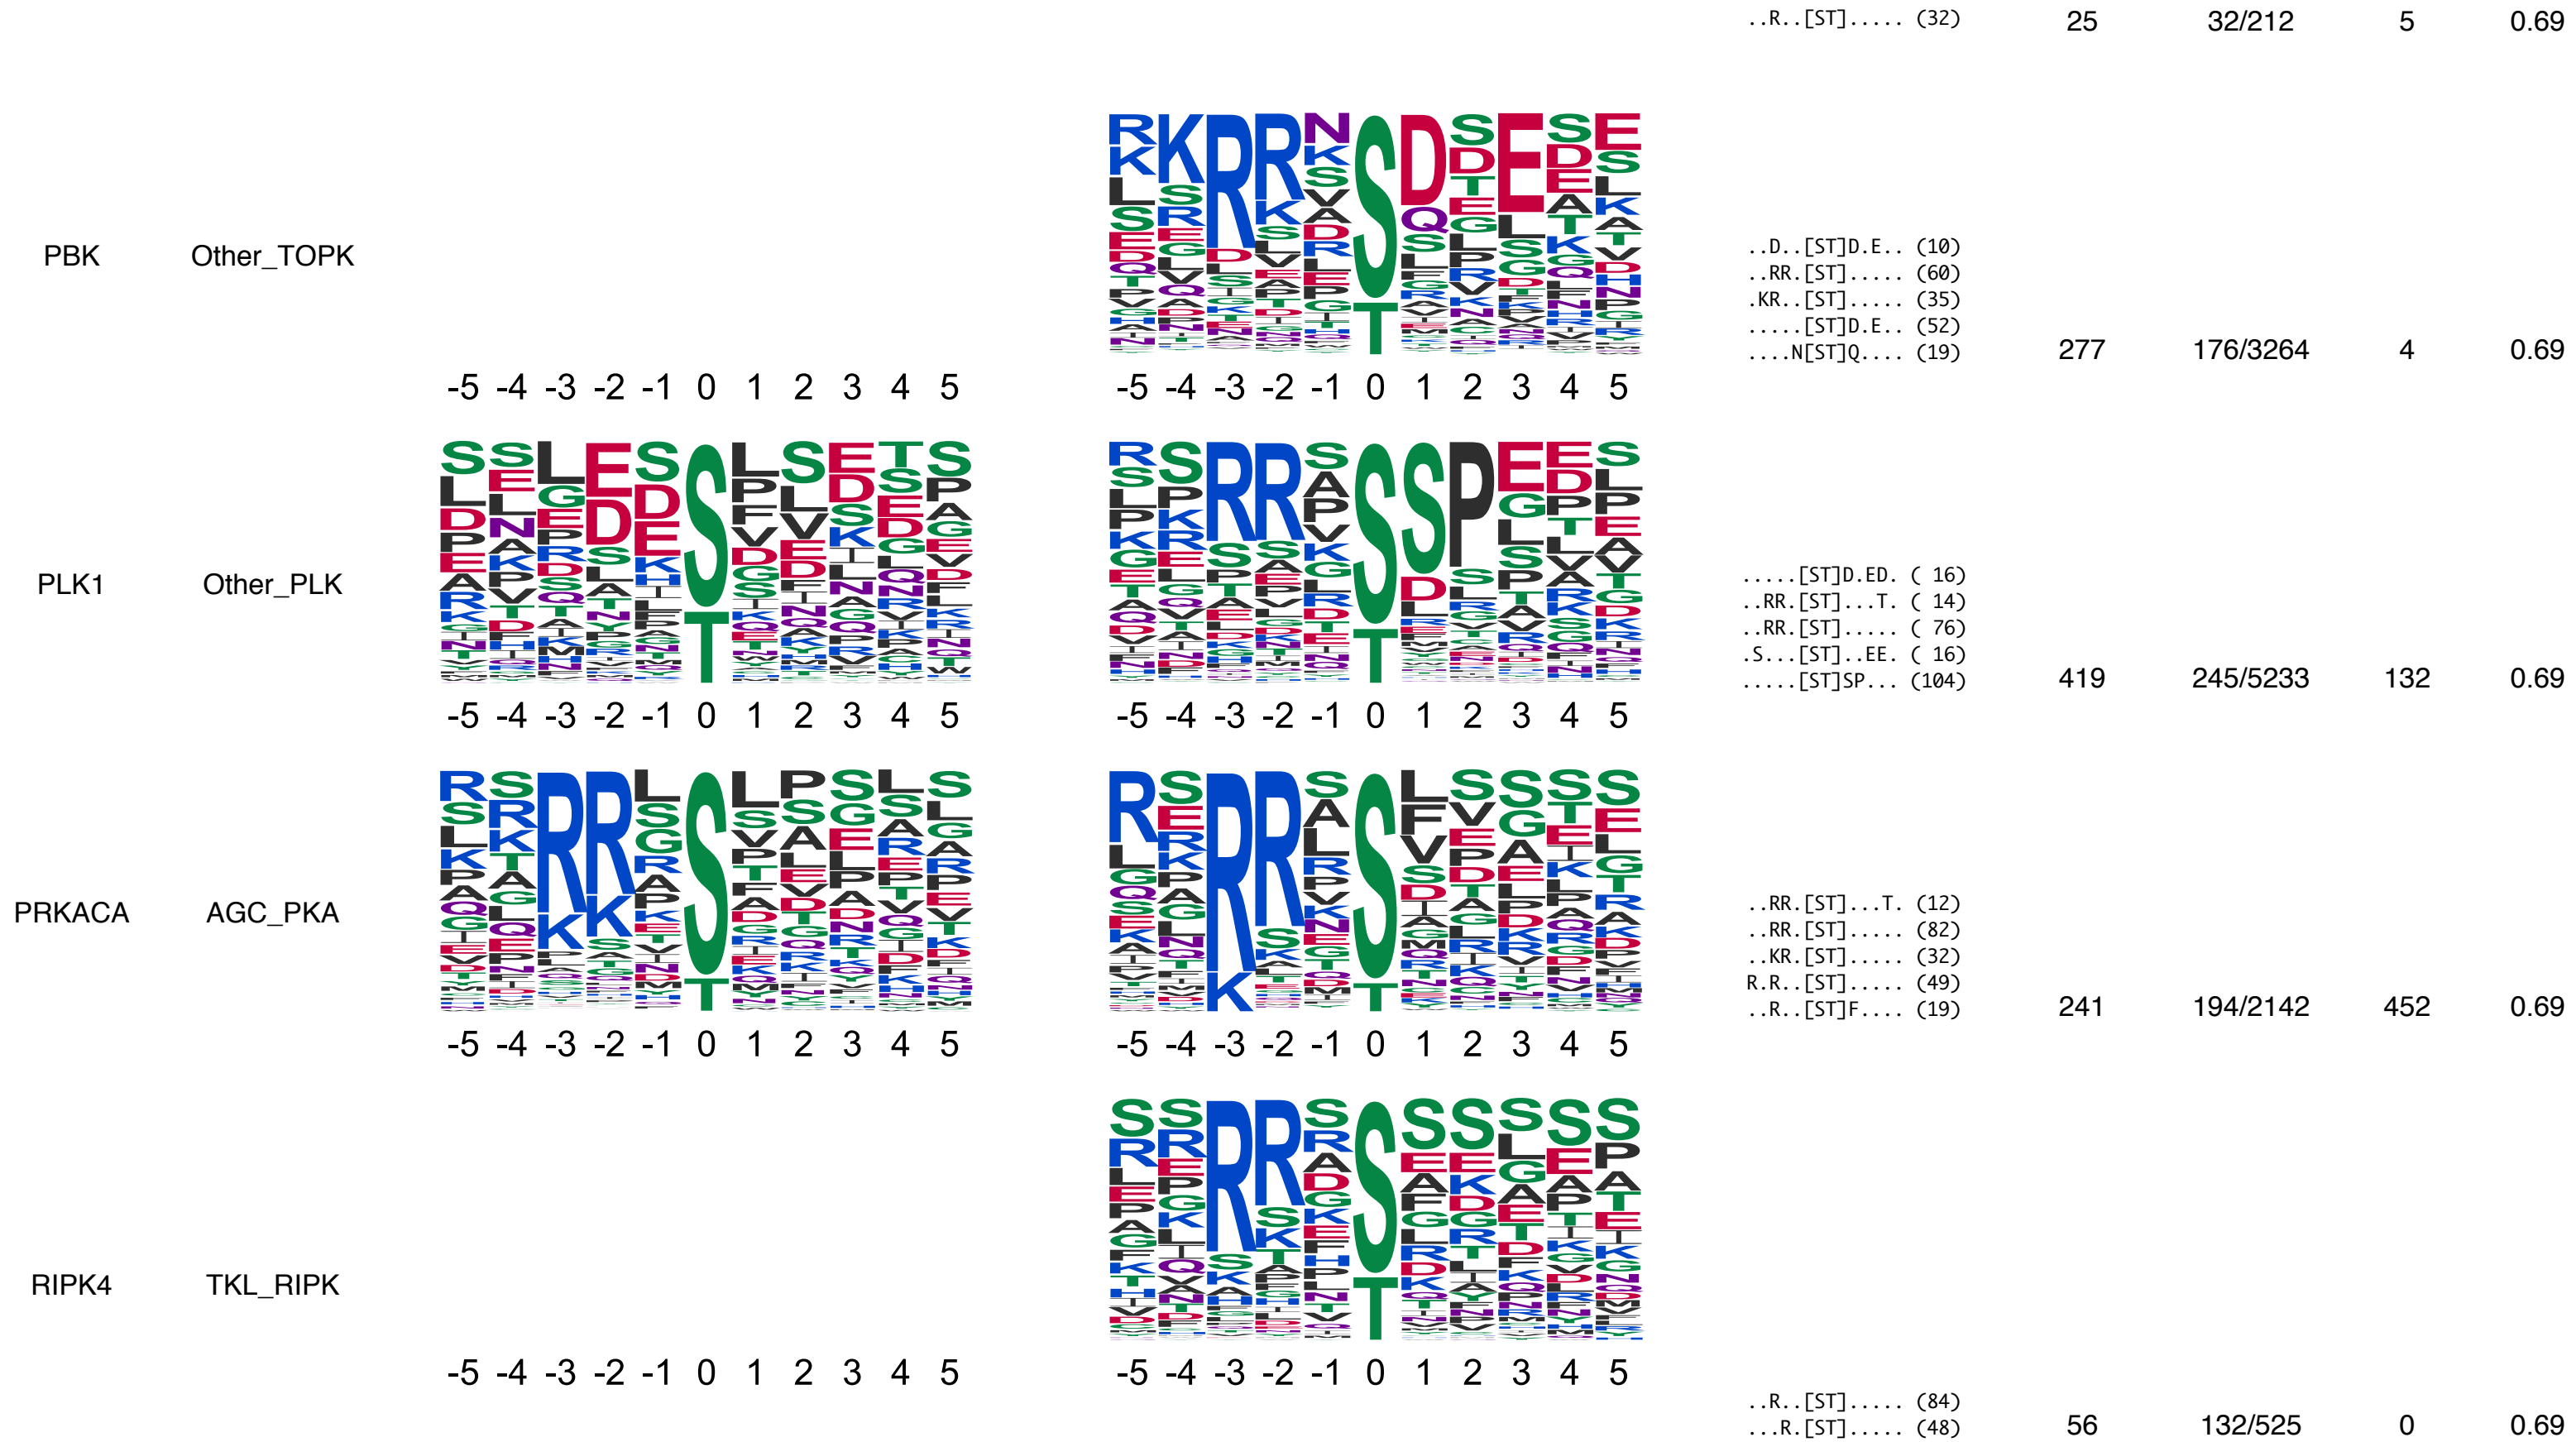

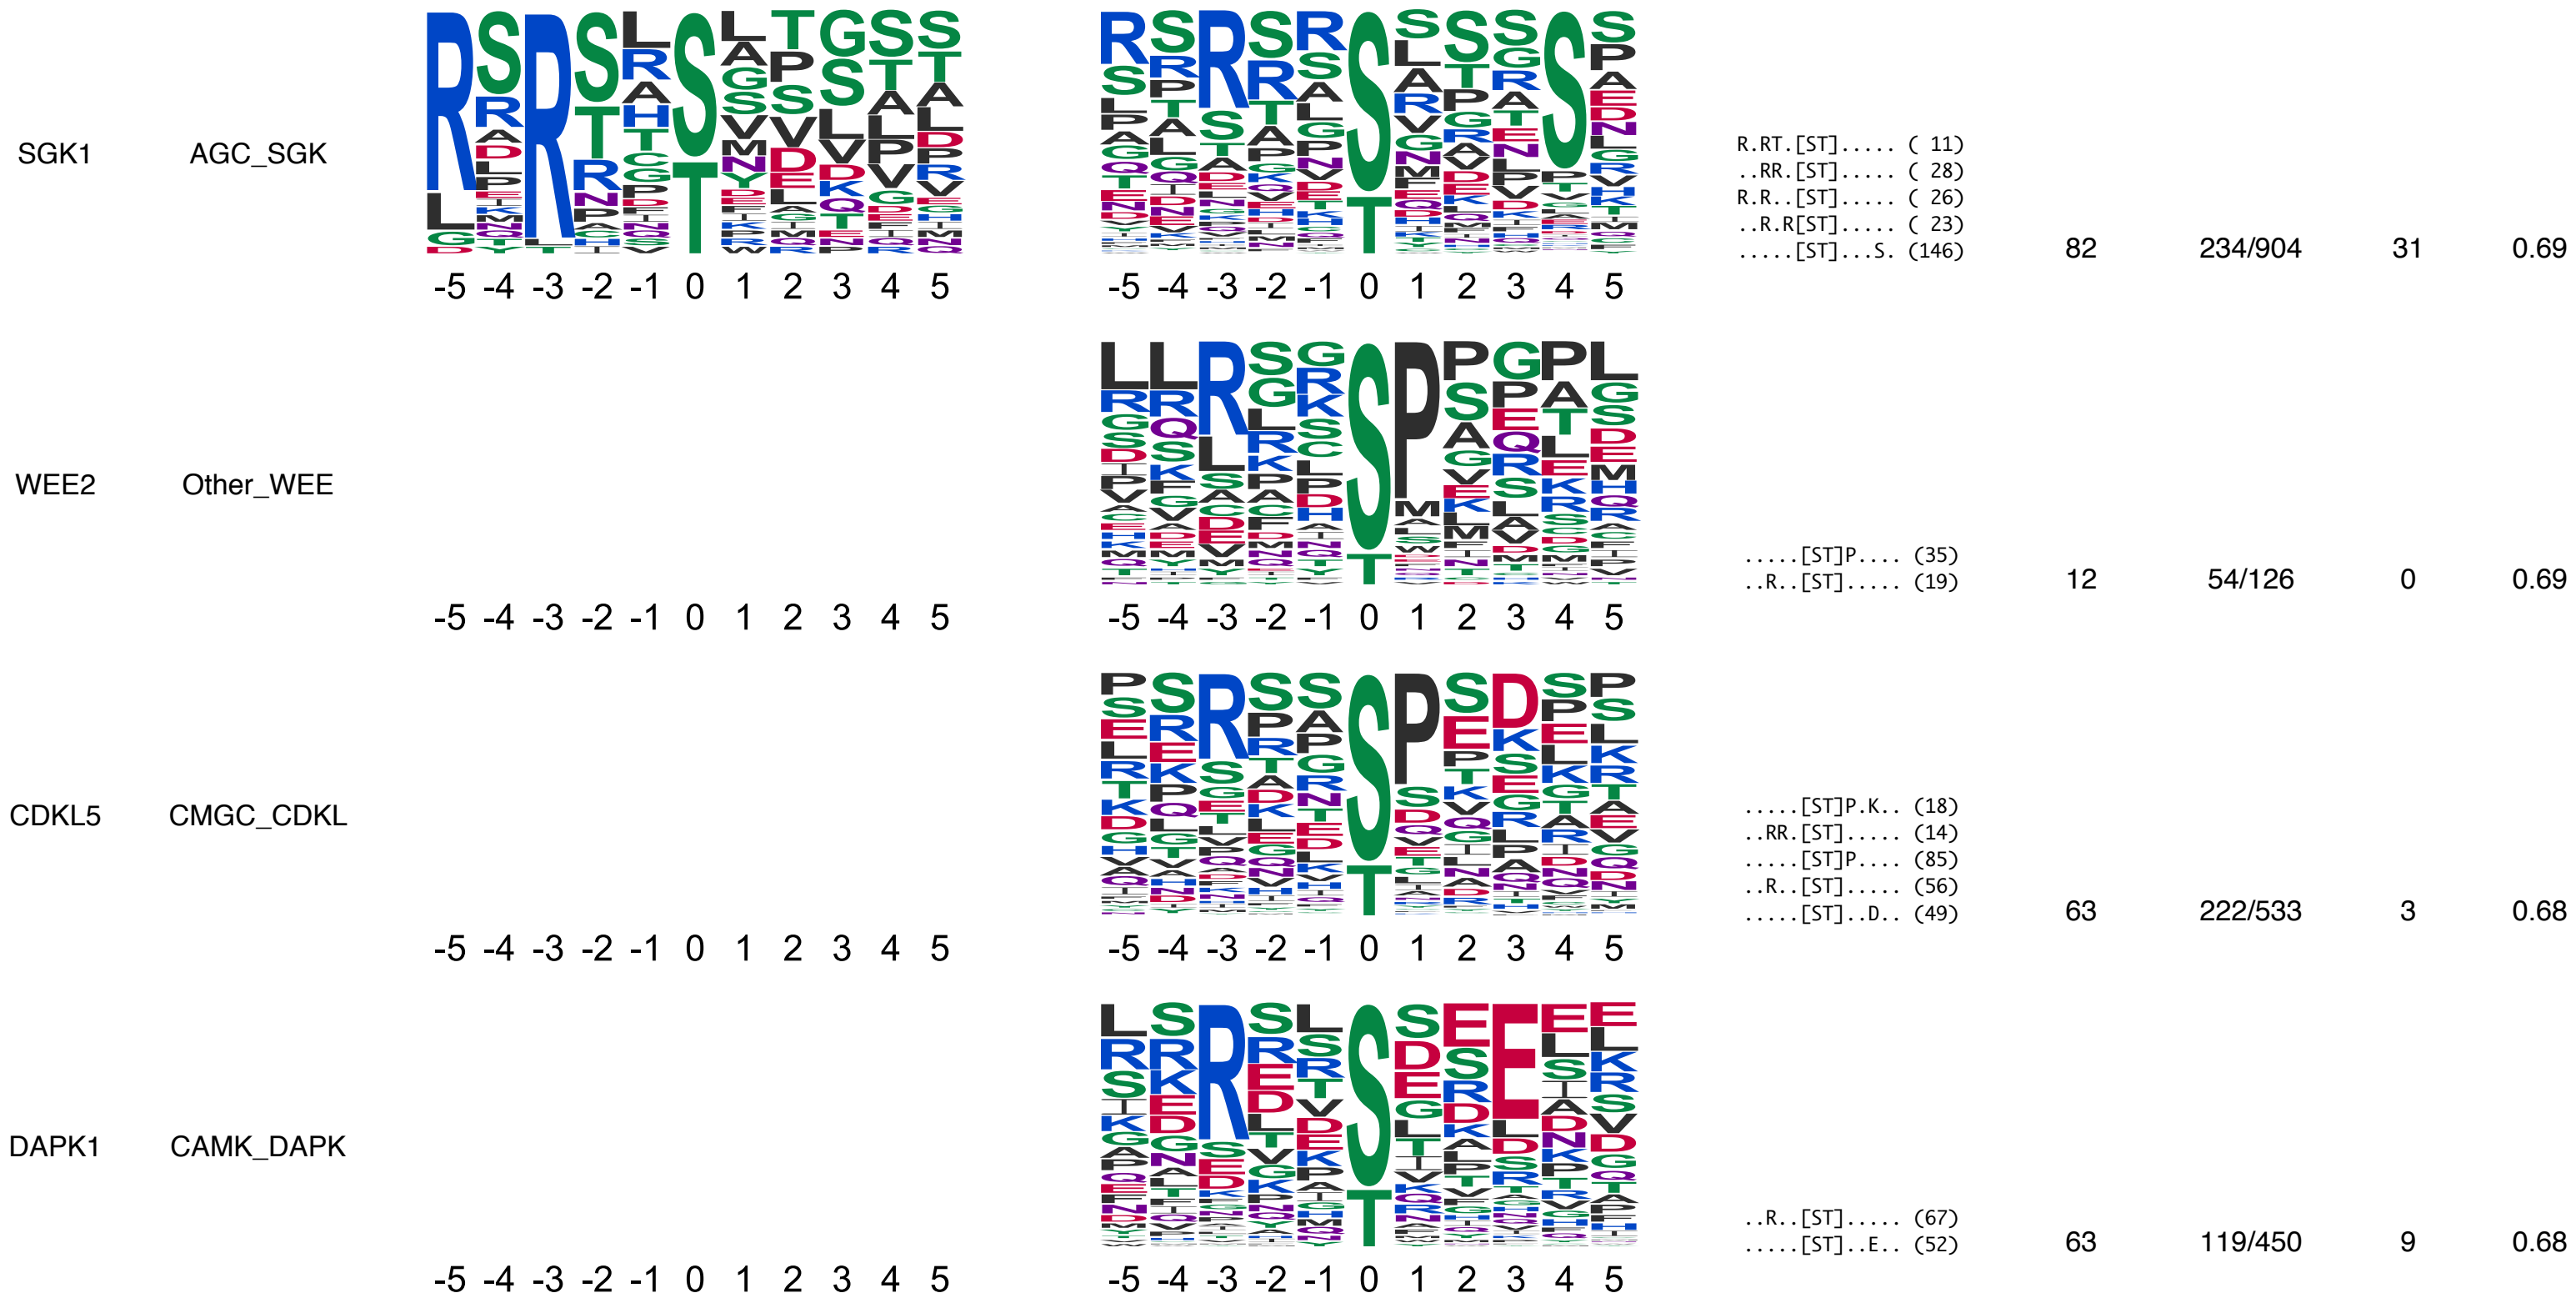

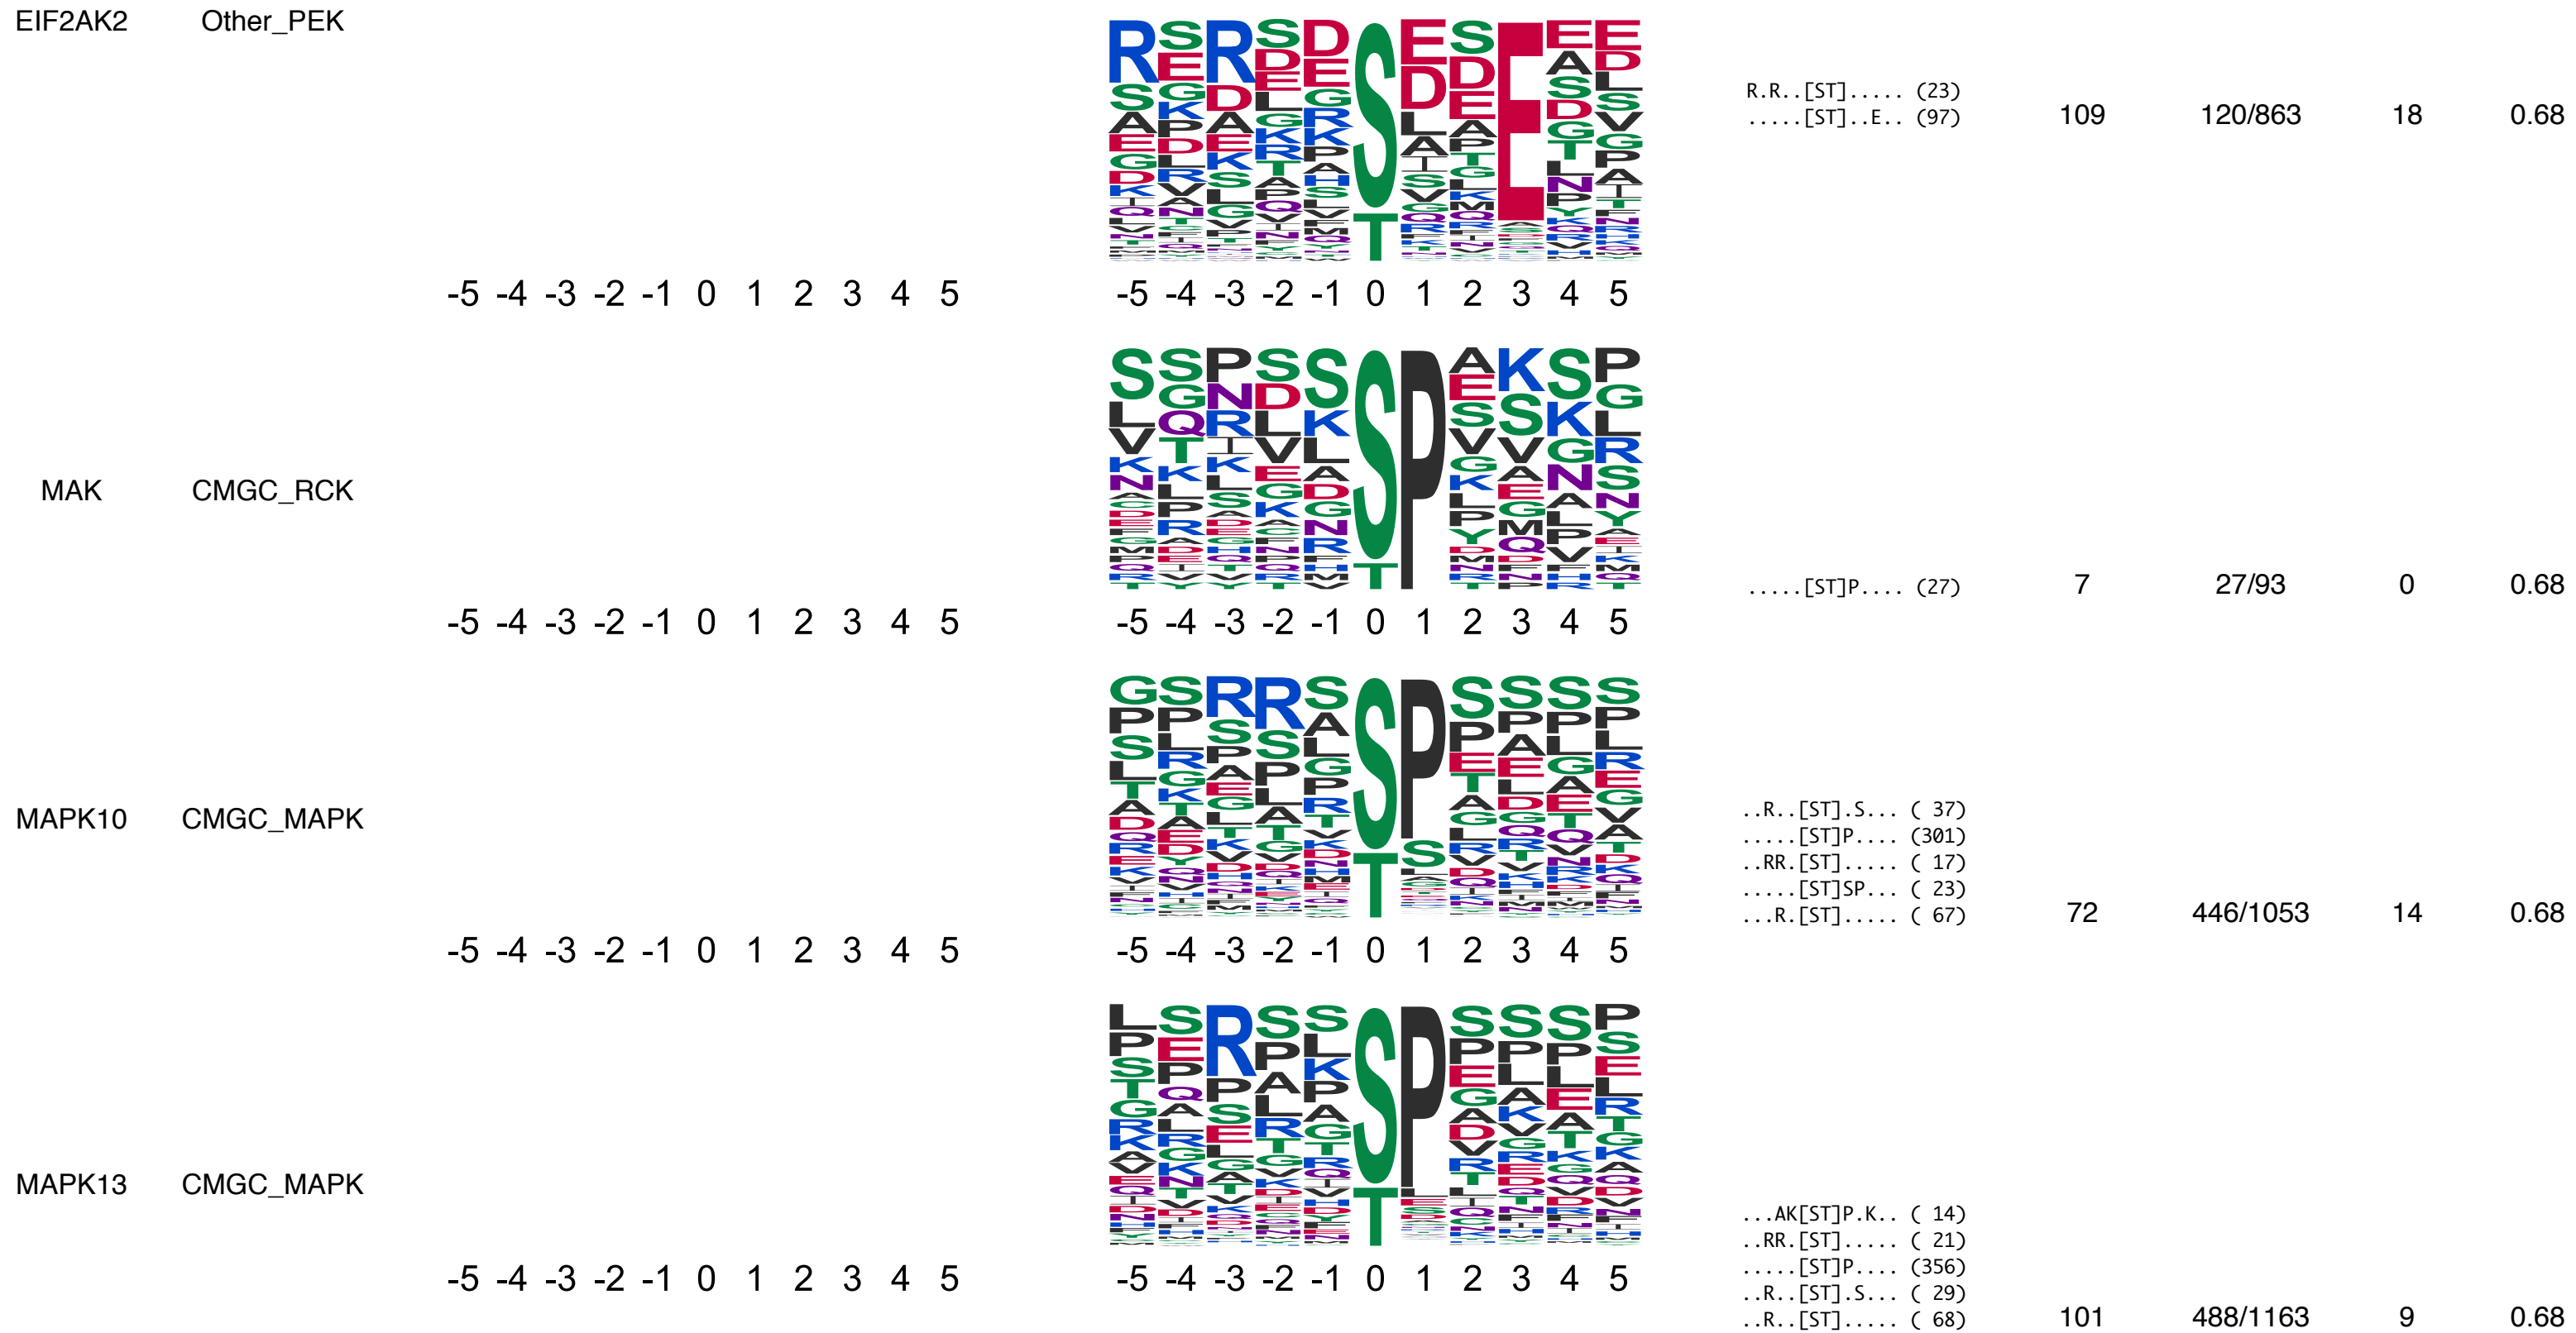

MASTL AGC\_MAST

-5 -4 -3 -2 -1 0 1 2 3 4 5

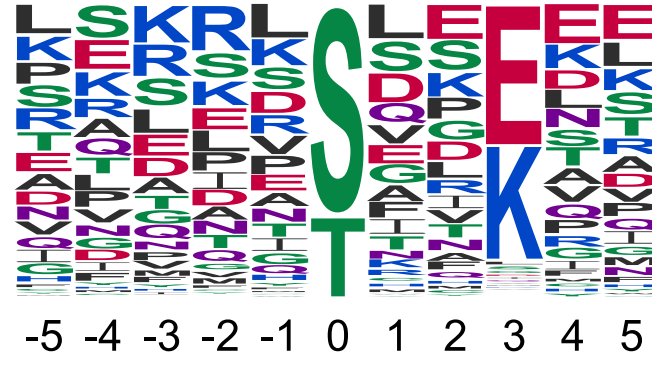

..RR.[ST]..... ( 27)  
 ..KR.[ST]..... ( 28)  
 .....[ST]D.E.. ( 32)  
 .....[ST]..K.. (161)  
 .....[ST]..E.. (165)

106 413/1667 0 0.68

NTRK3 TK\_Trk

-5 -4 -3 -2 -1 0 1 2 3 4 5

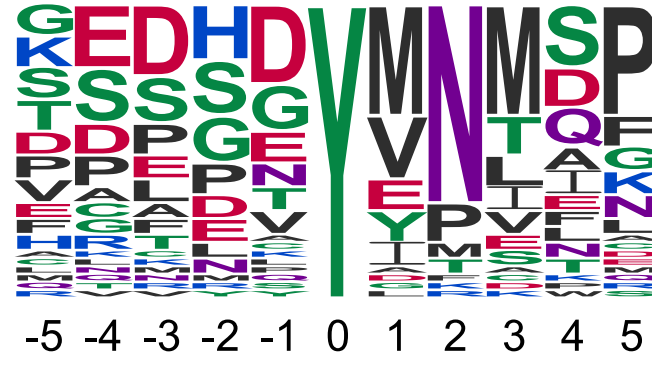

.....YM.M.. (13)  
 .....Y.N.... (24)

36 37/193 0 0.68

PASK CAMK\_CAMKL

-5 -4 -3 -2 -1 0 1 2 3 4 5

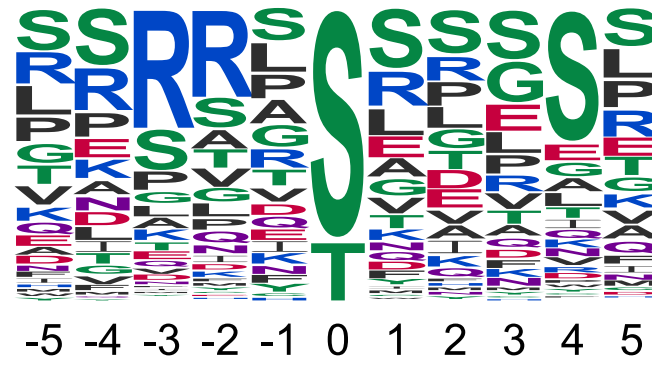

..RR.[ST]..... (16)  
 ..R..[ST]..... (66)  
 .....[ST]...S. (79)  
 ...R.[ST]..... (38)

29 199/492 3 0.68

PKN2 AGC\_PKN

-5 -4 -3 -2 -1 0 1 2 3 4 5

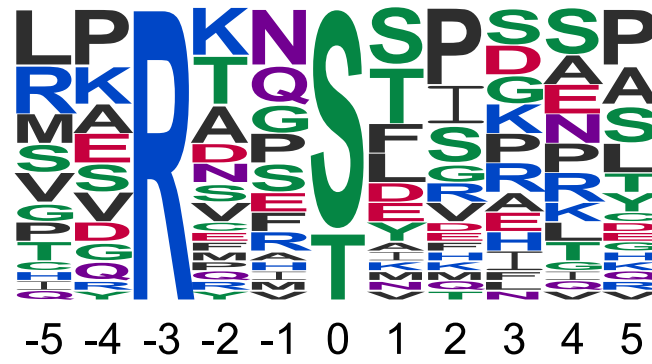

..R..[ST]..... (30)

16 30/204 0 0.68

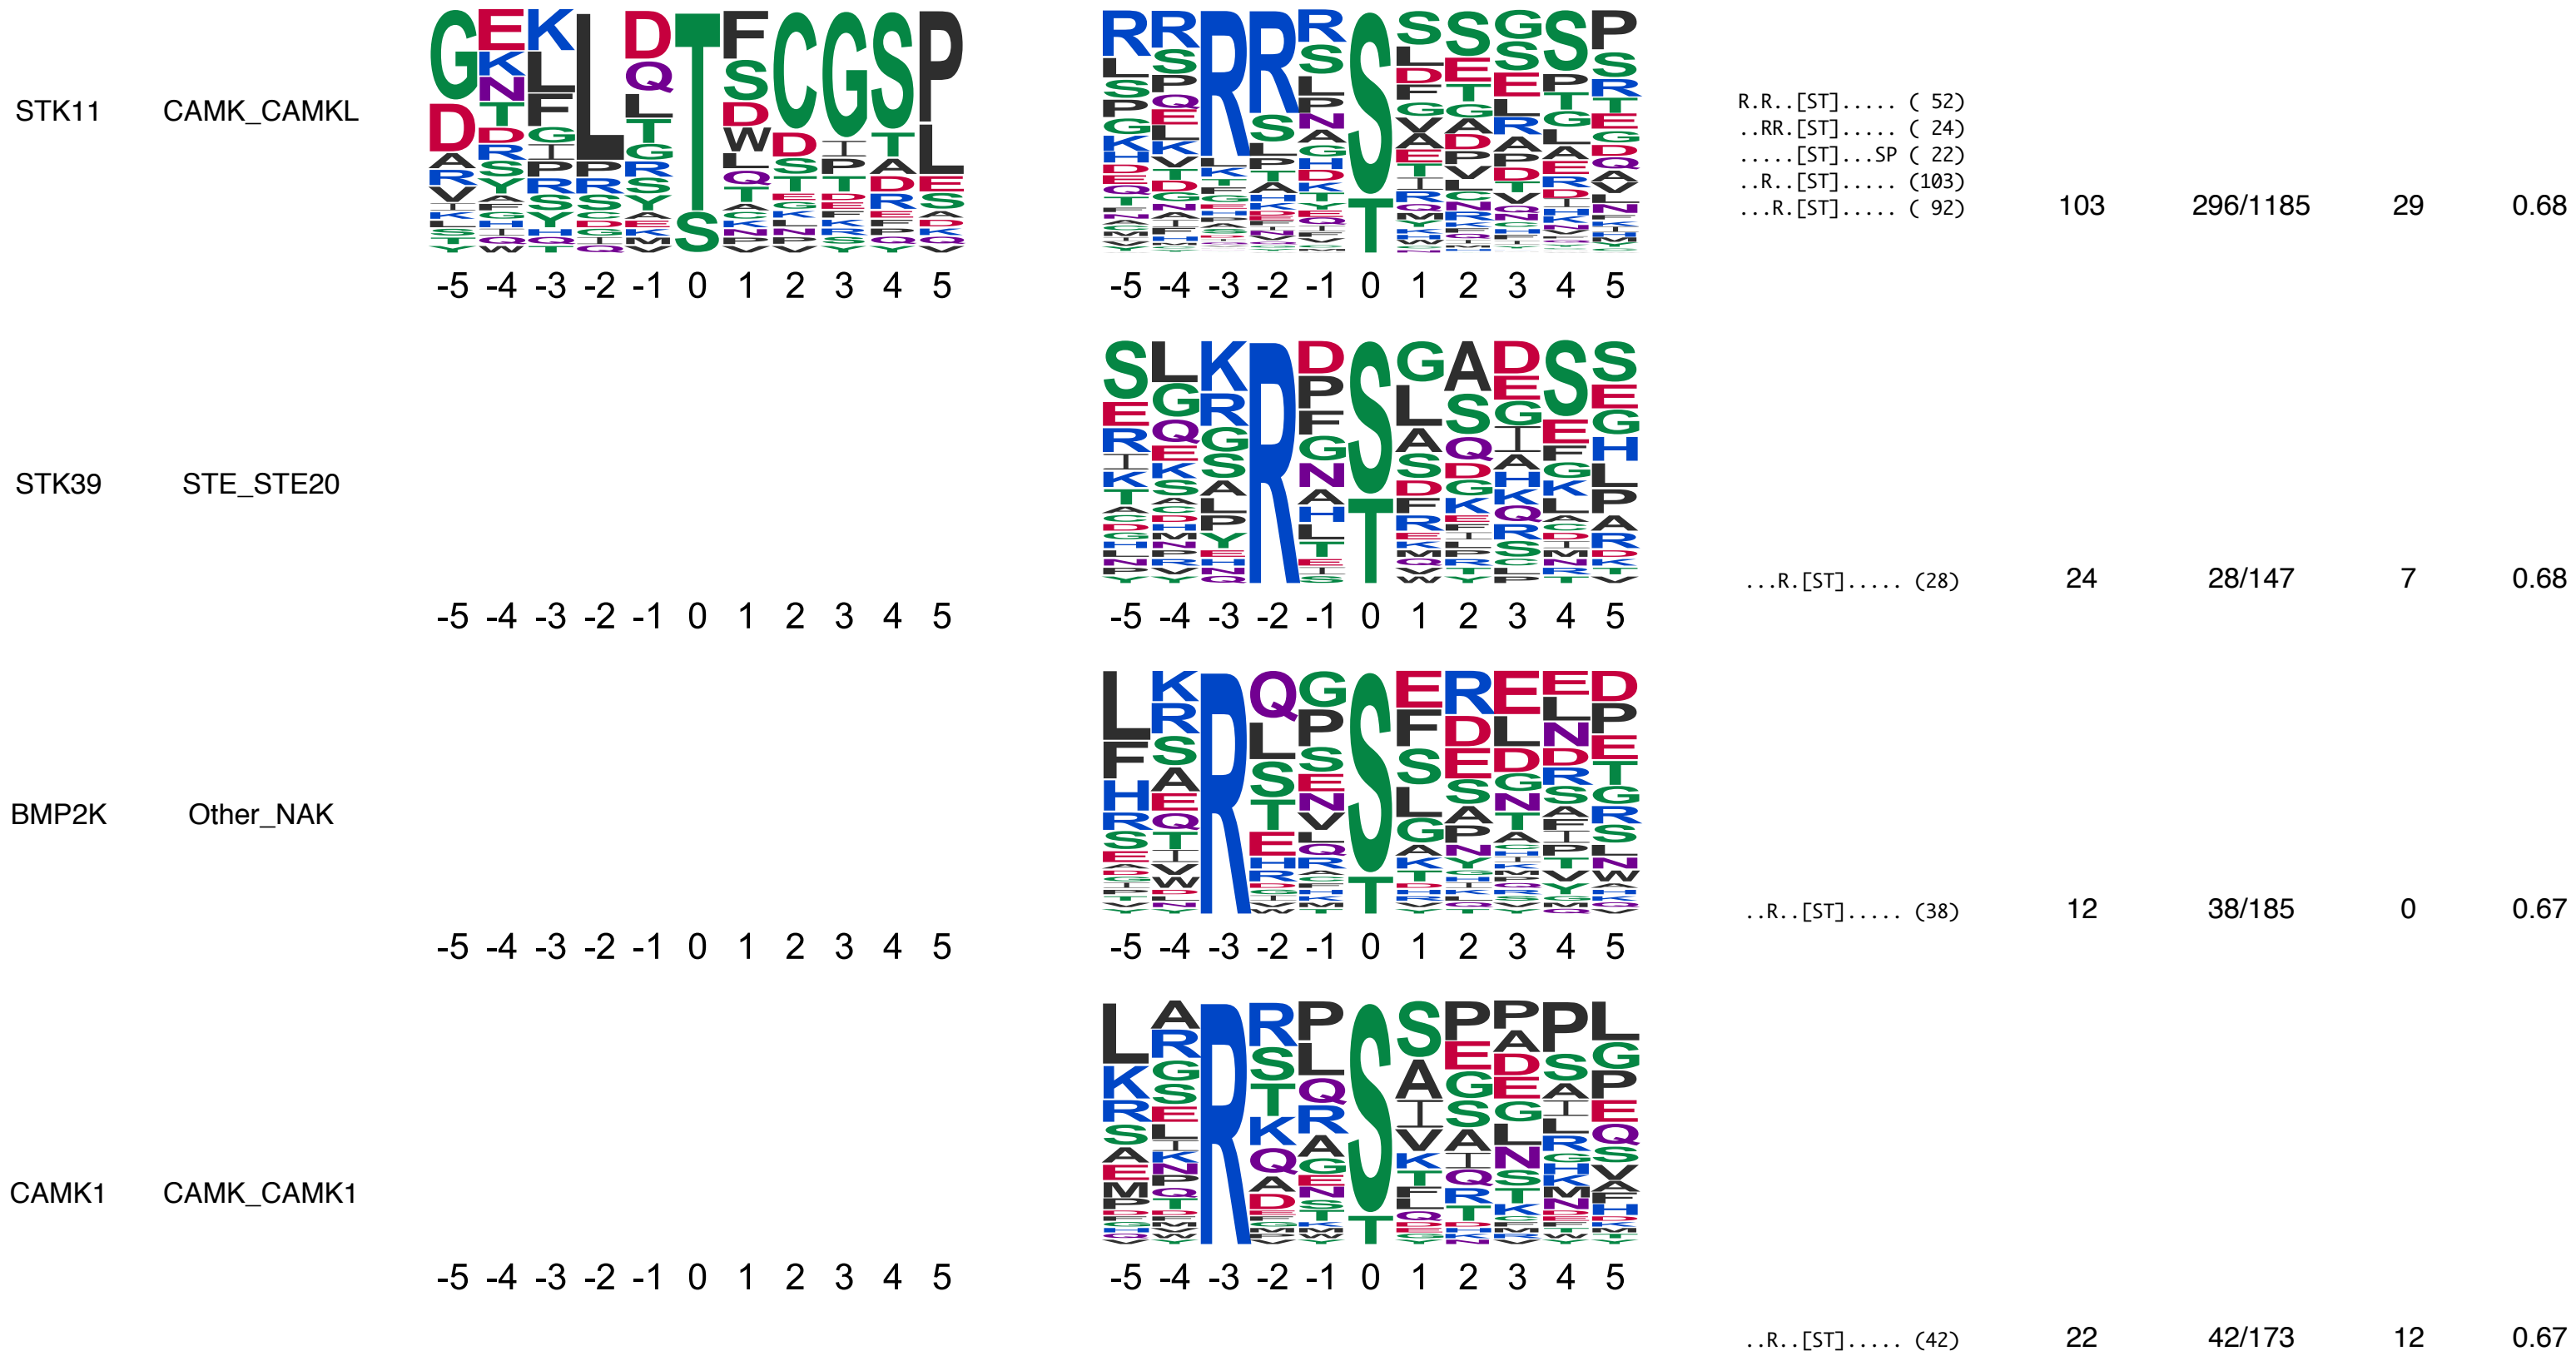



CAMK1D CAMK\_CAMK1

-5 -4 -3 -2 -1 0 1 2 3 4 5

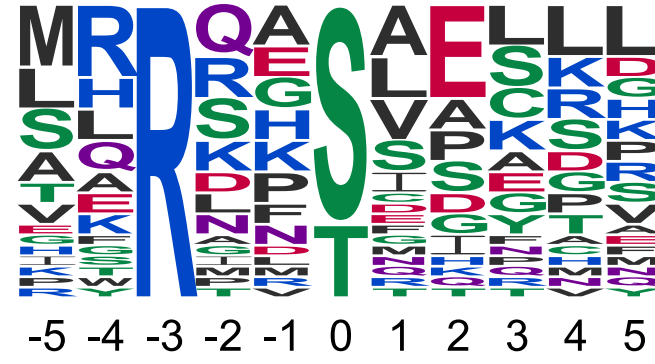

..R..[ST]..... (28)

26

28/161

0

0.67

CAMK2B CAMK\_CAMK2

-5 -4 -3 -2 -1 0 1 2 3 4 5

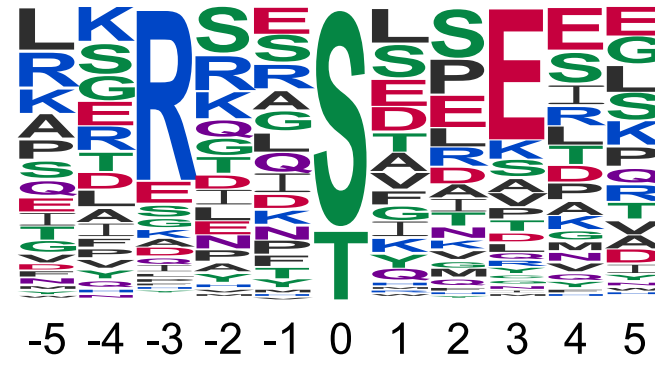

..RR.[ST]..... (19)  
..R..[ST]..... (80)  
.....[ST]E.. (68)

84

167/656

3

0.67

CAMK2D CAMK\_CAMK2

-5 -4 -3 -2 -1 0 1 2 3 4 5

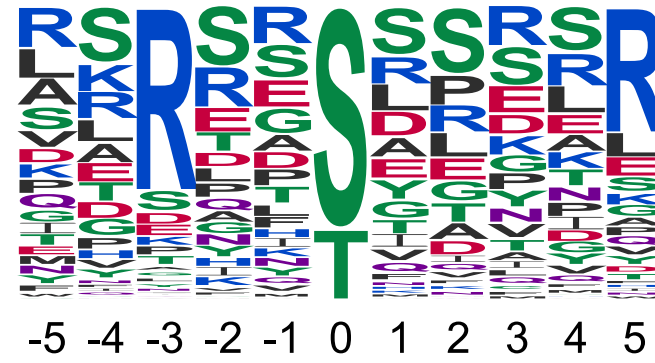

..R..[ST]..... (96)  
.....[ST]....R (57)

70

153/637

14

0.67

CASK CAMK\_CASK

-5 -4 -3 -2 -1 0 1 2 3 4 5

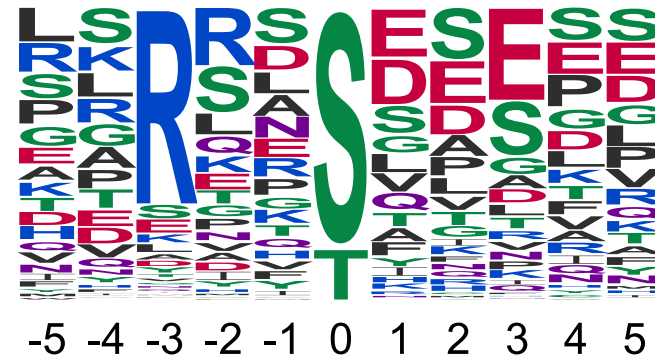

..RR.[ST]..... ( 26)  
.....[ST]D.E.. ( 34)  
..R..[ST]..... (153)  
.....[ST]E.E.. ( 28)  
...R.[ST]..S.. ( 21)

185

272/1418

5

0.67

CDK19 CMGC\_CDK

-5 -4 -3 -2 -1 0 1 2 3 4 5

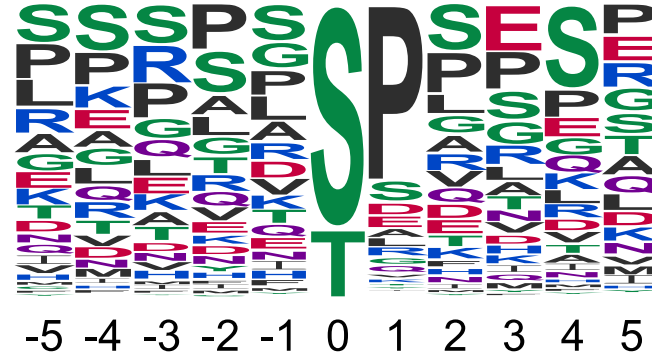

.....[ST]P.... (287)  
 ..R..[ST].S... ( 25)  
 .....[ST]SP... ( 22)  
 .....[ST]...S. ( 88)  
 .....[ST]..E.. ( 57)

73 479/848 3 0.67

DMPK AGC\_DMPK

-5 -4 -3 -2 -1 0 1 2 3 4 5

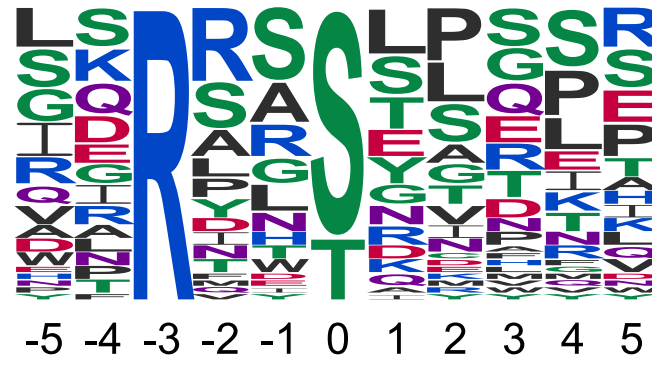

..RR.[ST]..... (11)  
 ..R..[ST]..... (32)

28 43/246 1 0.67

GRK5 AGC\_GRK

-5 -4 -3 -2 -1 0 1 2 3 4 5

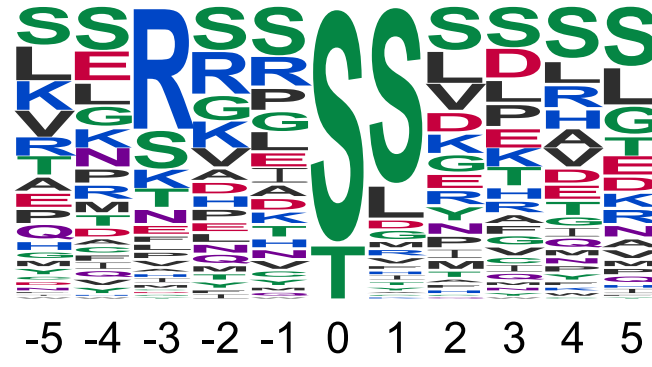

..R..[ST]..... (46)  
 .....[ST]S.... (63)

87 109/362 14 0.67

HIPK2 CMGC\_DYRK

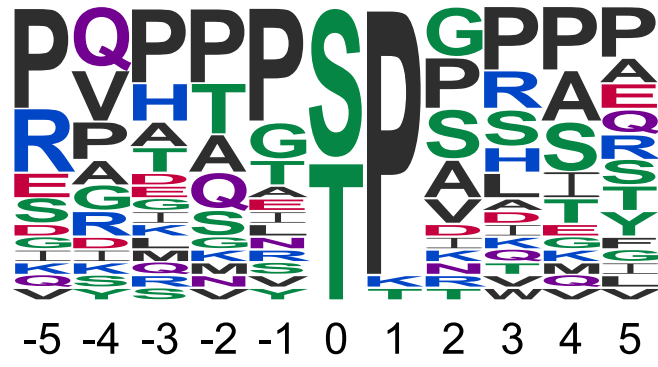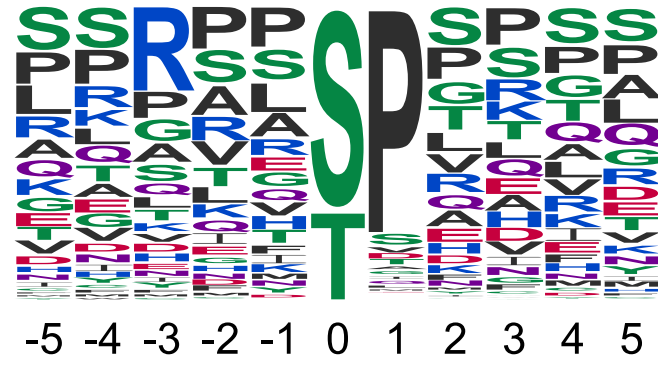

.....[ST]P.... (232)  
 ..R..[ST]..... ( 69)

76 301/811 23 0.67

MAPK12 CMGC\_MAPK

-5 -4 -3 -2 -1 0 1 2 3 4 5

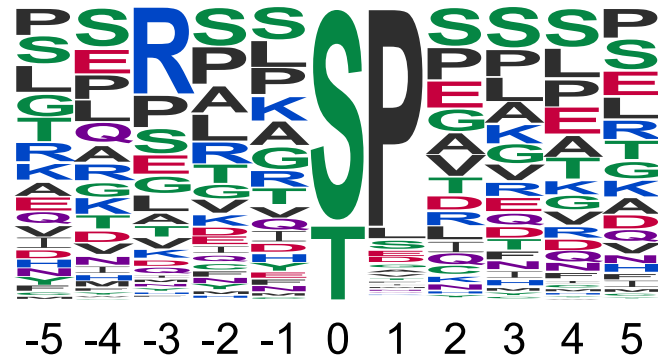

...AK[ST]P.K.. ( 14)  
 ..RR.[ST]..... ( 20)  
 ..R..[ST].S... ( 32)  
 .....[ST]P.... (392)  
 ..R..[ST]..... ( 84)

105 542/1312 8 0.67

NEK1 Other\_NEK

-5 -4 -3 -2 -1 0 1 2 3 4 5

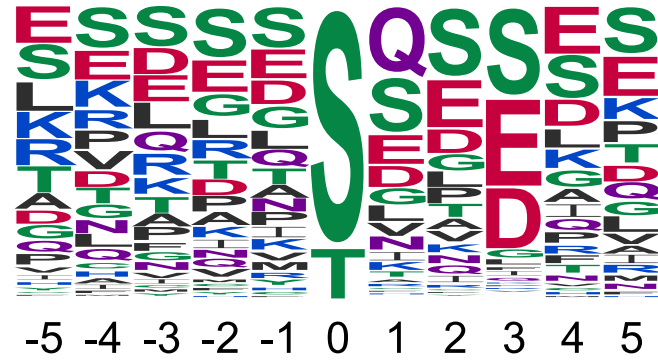

.....[ST]...E.. (66)  
 .....[ST]...S.. (63)  
 .....[ST]Q.... (41)  
 .....[ST]...D.. (46)

18 216/417 2 0.67

PAK2 STE\_STE20

-5 -4 -3 -2 -1 0 1 2 3 4 5

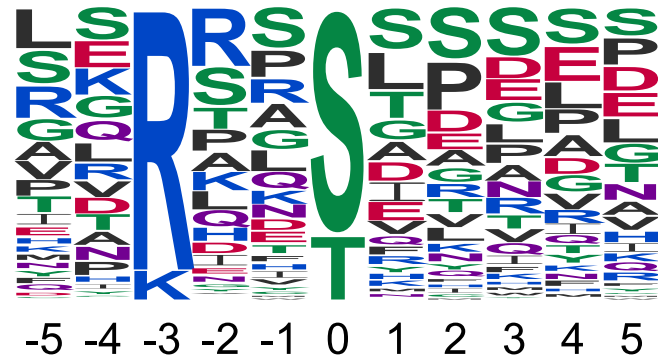

..R..[ST].P... ( 34)  
 ..R..[ST]...E. ( 23)  
 ..RR.[ST]..... ( 20)  
 ..KR.[ST]..... ( 22)  
 ..R..[ST]..... (116)

133 215/1268 29 0.67

PAK6 STE\_STE20

-5 -4 -3 -2 -1 0 1 2 3 4 5

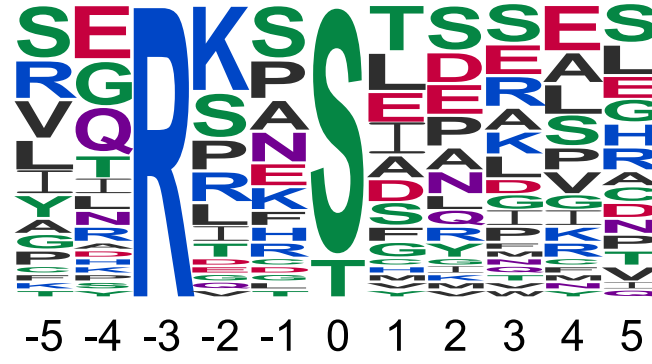

..R..[ST]..... (37)

20

37/199

0

0.67

PAK7 STE\_STE20

-5 -4 -3 -2 -1 0 1 2 3 4 5

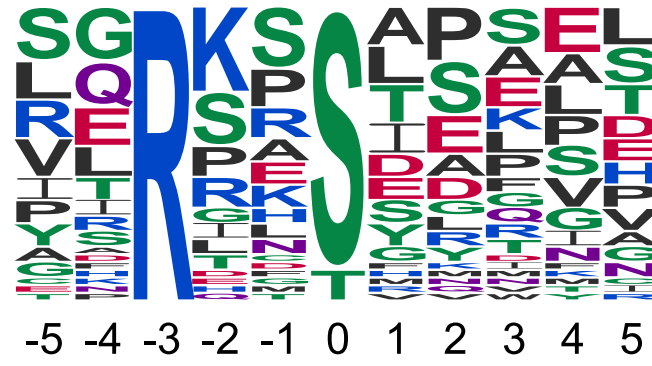

..R..[ST]..... (38)

22

38/192

1

0.67

PRKD1 CAMK\_PKD

-5 -4 -3 -2 -1 0 1 2 3 4 5

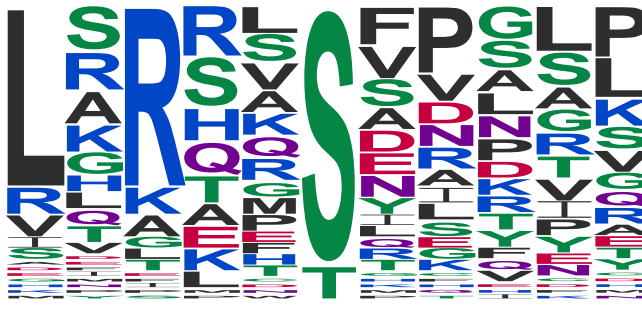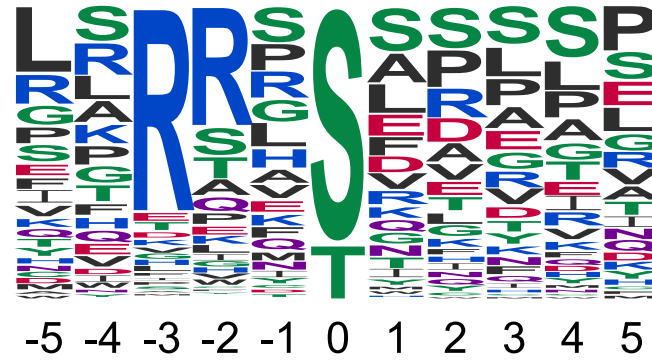

L.R..[ST].P... ( 13)  
..RR.[ST]..... ( 21)  
..R..[ST]..... (101)  
...R.[ST]..... ( 58)

62

193/701

52

0.67

ROCK1 AGC\_DMPK

-5 -4 -3 -2 -1 0 1 2 3 4 5

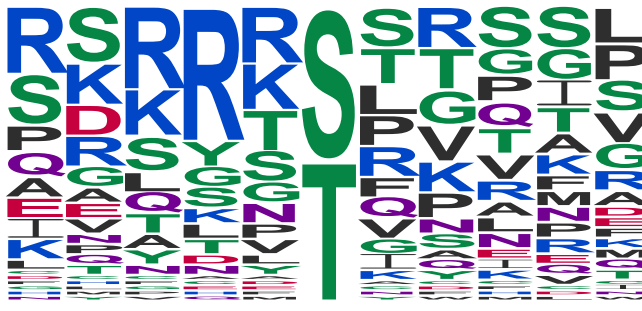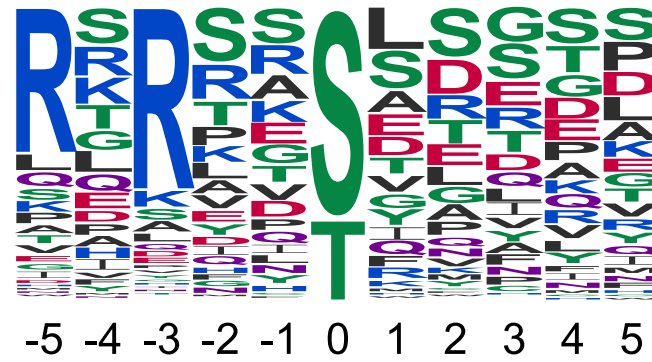

..R..[ST]..... (110)  
R....[ST]..... ( 67)

54

177/682

57

0.67

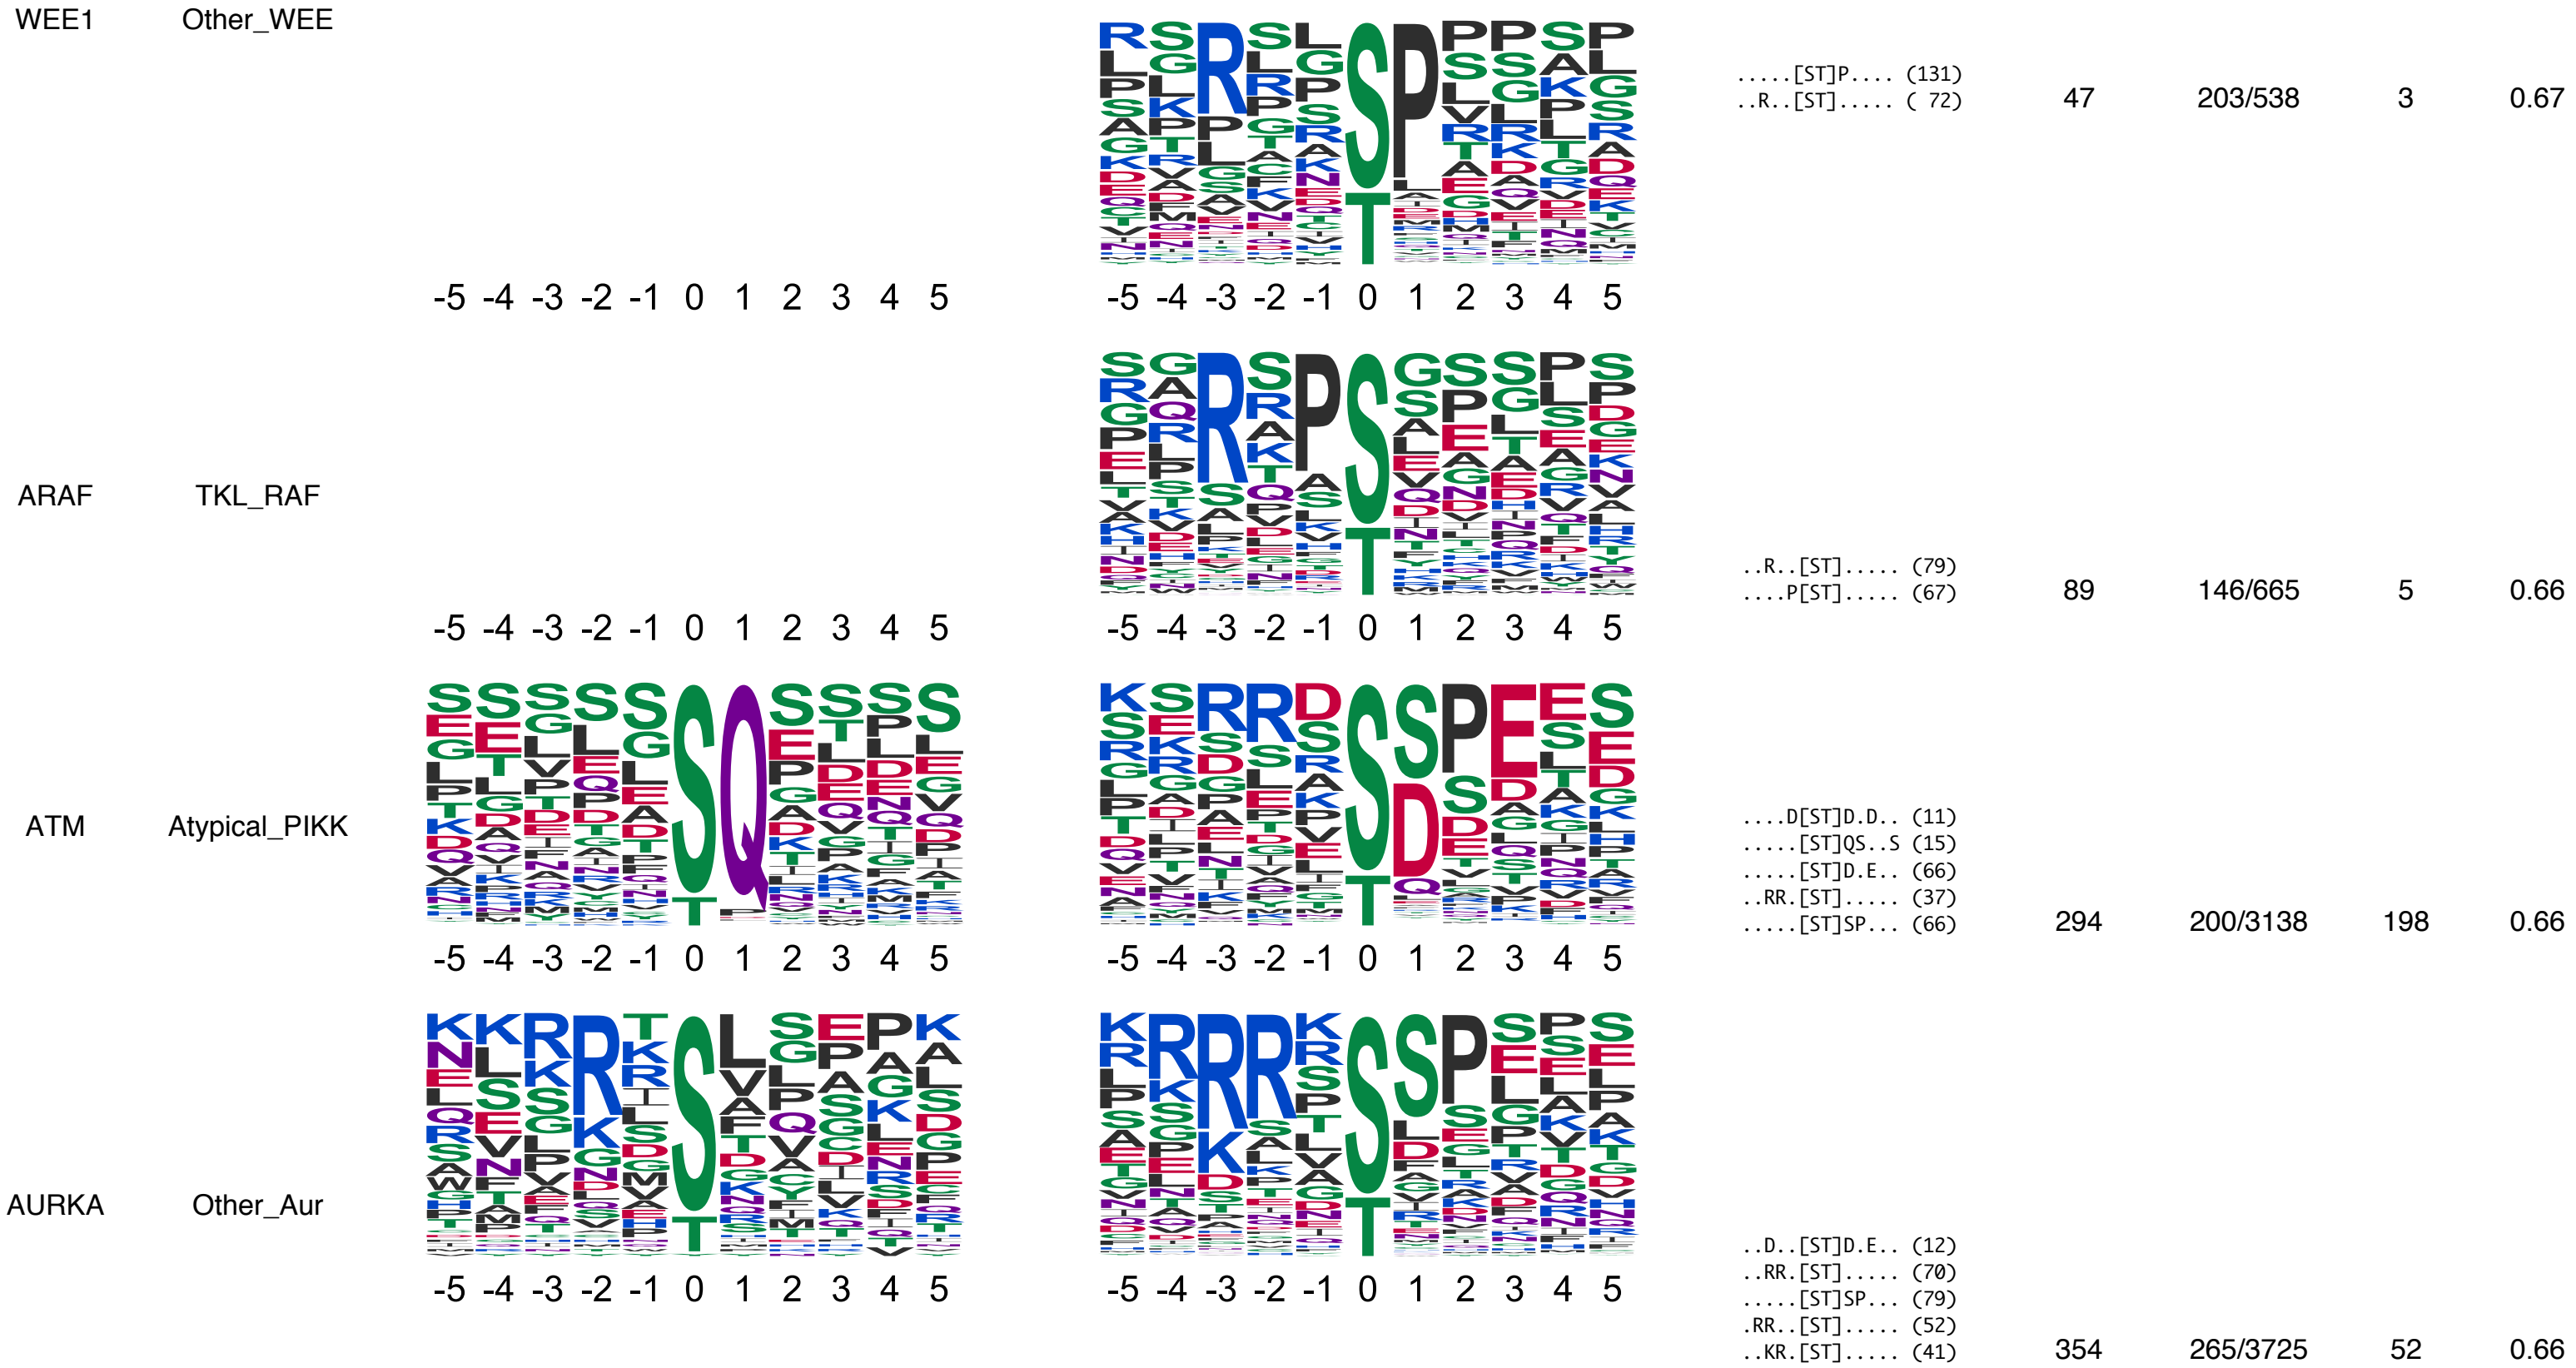

CDK3 CMGC\_CDK

-5 -4 -3 -2 -1 0 1 2 3 4 5

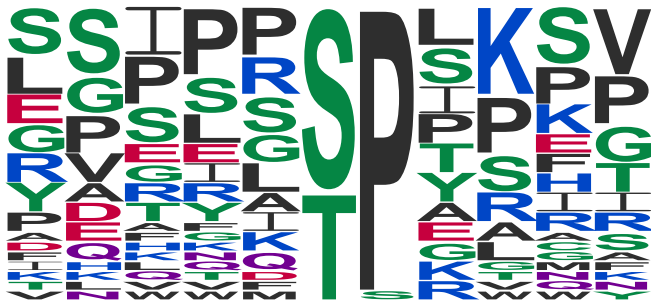

-5 -4 -3 -2 -1 0 1 2 3 4 5

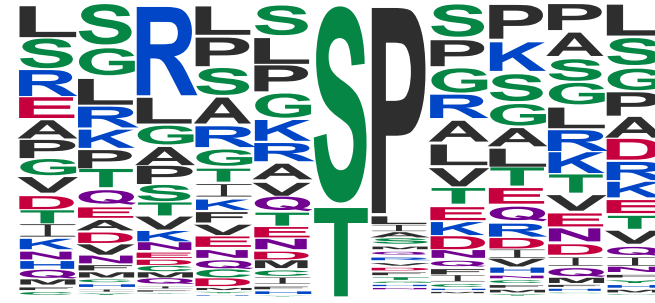

-5 -4 -3 -2 -1 0 1 2 3 4 5

.....[ST]P.K.. ( 34)  
..RR.[ST]..... ( 17)  
.....[ST]P.... (234)  
..R..[ST]..... ( 89)

92 374/1098 13 0.66

CDK6 CMGC\_CDK

-5 -4 -3 -2 -1 0 1 2 3 4 5



-5 -4 -3 -2 -1 0 1 2 3 4 5

...PL[ST]P.... ( 12)  
.....[ST]P.K.. ( 51)  
R.R..[ST]..... ( 28)  
.....[ST]P...K ( 32)  
.....[ST]P.... (313)

108 436/1392 30 0.66

GSK3A CMGC\_GSK

-5 -4 -3 -2 -1 0 1 2 3 4 5

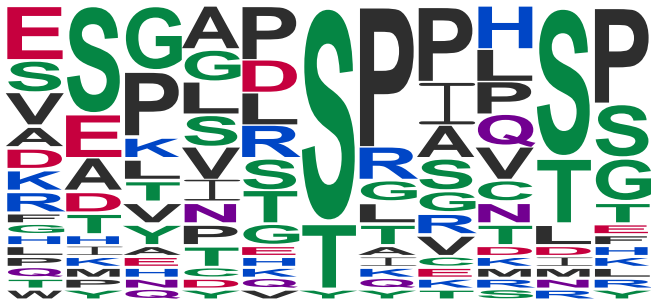

-5 -4 -3 -2 -1 0 1 2 3 4 5

.....[ST]PP... ( 41)  
.....[ST]P.... (170)  
..R..[ST]..... ( 79)  
..S..[ST]..... ( 97)  
.....[ST]...S. ( 72)

57 459/800 27 0.66

MAPK7 CMGC\_MAPK

-5 -4 -3 -2 -1 0 1 2 3 4 5

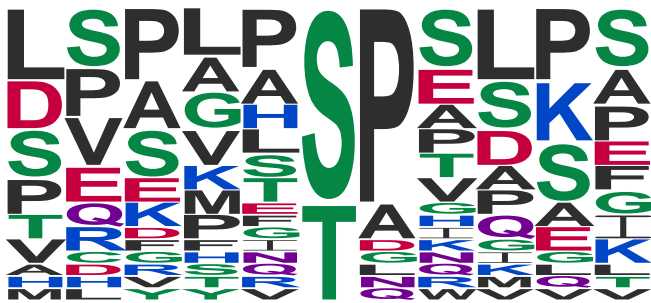

-5 -4 -3 -2 -1 0 1 2 3 4 5

.....[ST]P.... (169)  
..R..[ST]..... ( 73)

50 242/584 24 0.66

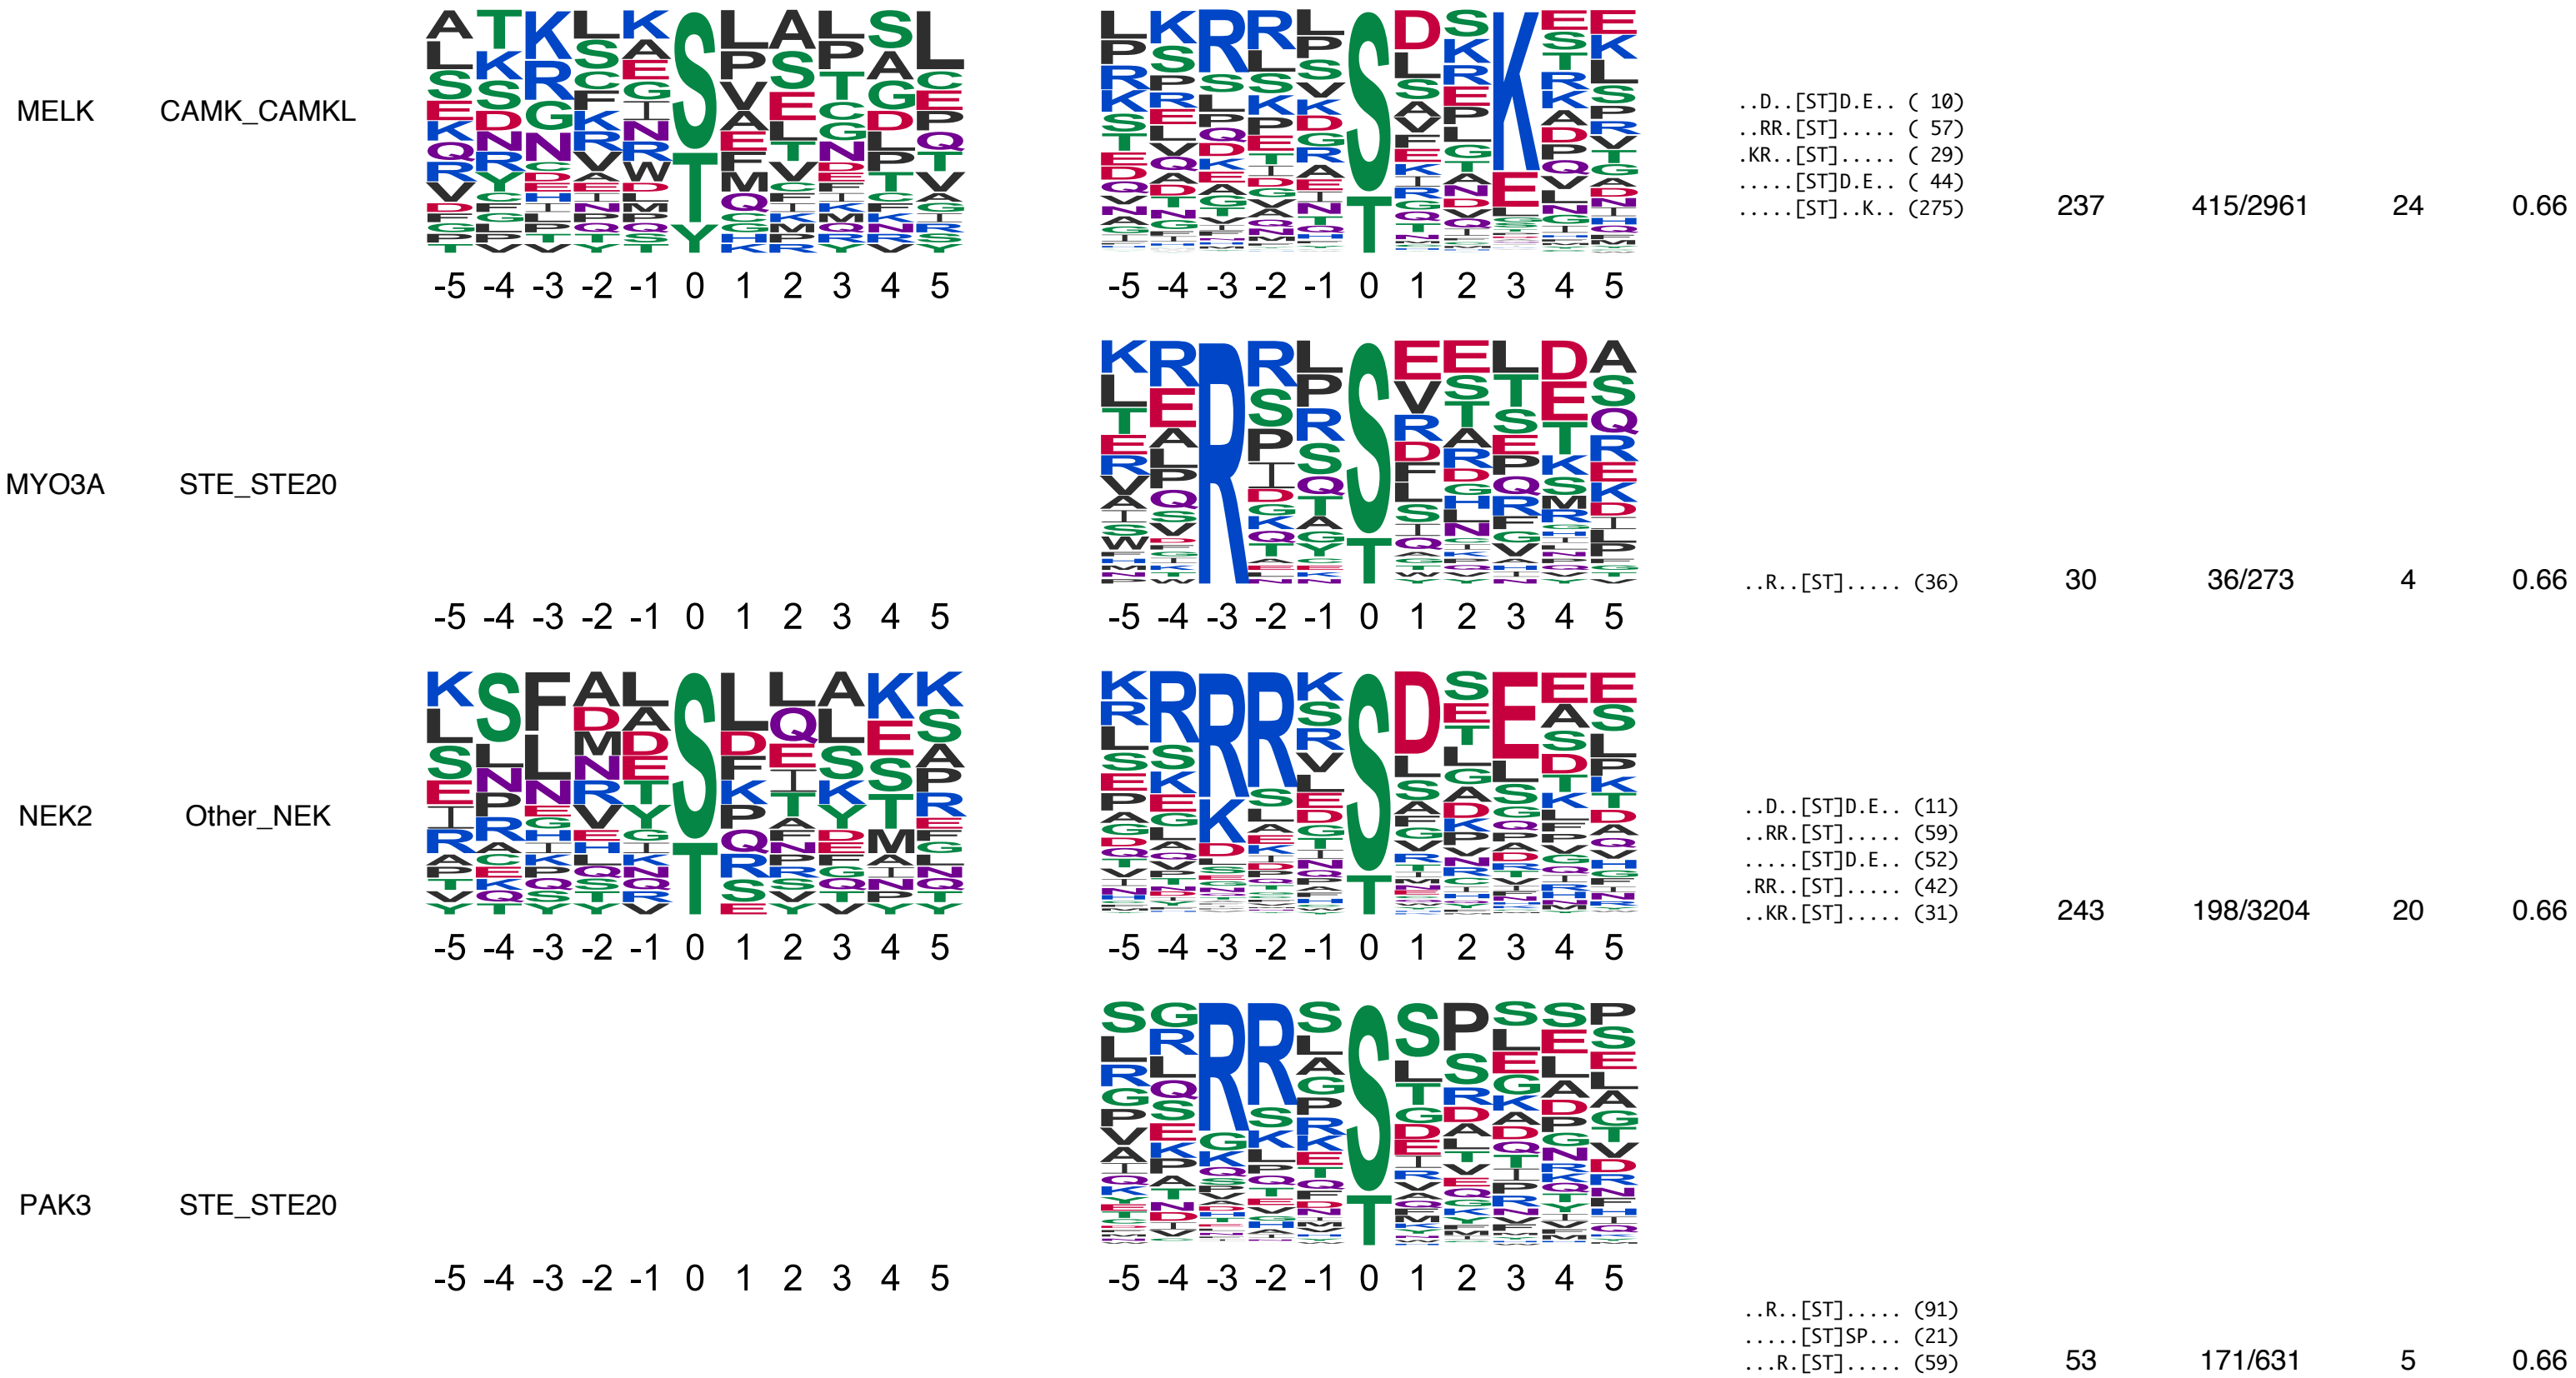

PIK3CG

PKL\_PIK

-5 -4 -3 -2 -1 0 1 2 3 4 5

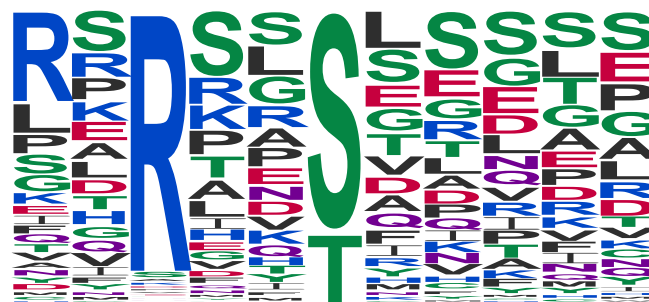

-5 -4 -3 -2 -1 0 1 2 3 4 5

R..RT.[ST]..... ( 13)  
 R..R..[ST]..... ( 50)  
 ..RR.[ST]..... ( 26)  
 ..R..[ST]..... (191)  
 R..S.[ST]..... ( 32)

244      315/1886      2      0.66

PLK4

Other\_PLK

-5 -4 -3 -2 -1 0 1 2 3 4 5

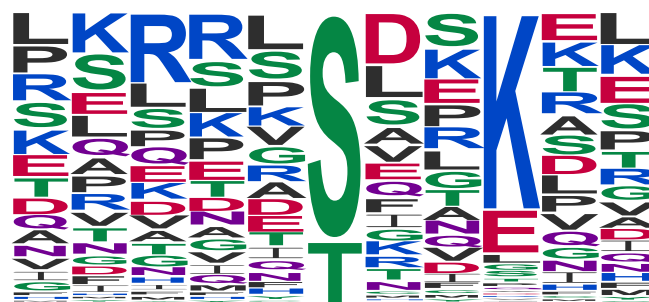

-5 -4 -3 -2 -1 0 1 2 3 4 5

..D..[ST]D.E.. ( 11)  
 ..RR.[ST]..... ( 58)  
 .....[ST]D.E.. ( 52)  
 .KR..[ST]..... ( 27)  
 .....[ST]..K.. (304)

256      454/3358      5      0.66

PRKAA2

CAMK\_CAMKL

-5 -4 -3 -2 -1 0 1 2 3 4 5

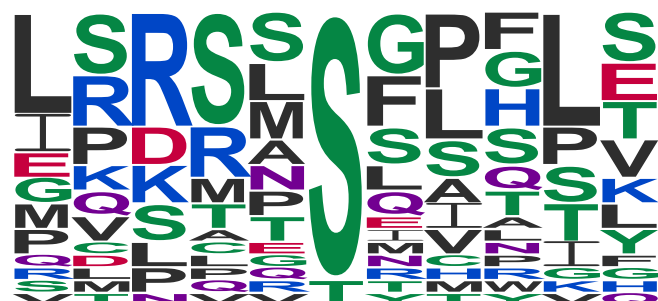

-5 -4 -3 -2 -1 0 1 2 3 4 5

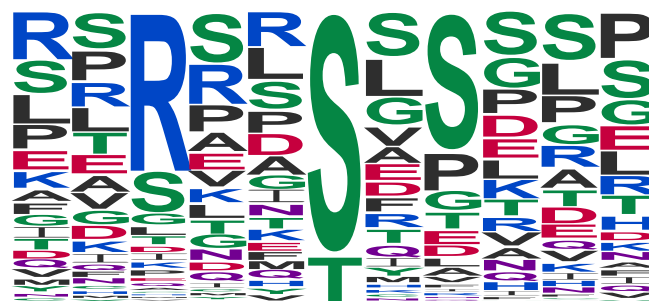

-5 -4 -3 -2 -1 0 1 2 3 4 5

..RR.[ST]..... (19)  
 R..R..[ST]..... (23)  
 ..R..[ST]..... (80)  
 ..S..[ST].P... (22)  
 .....[ST].S... (80)

56      224/588      23      0.66

PRKCH

AGC\_PKC

-5 -4 -3 -2 -1 0 1 2 3 4 5

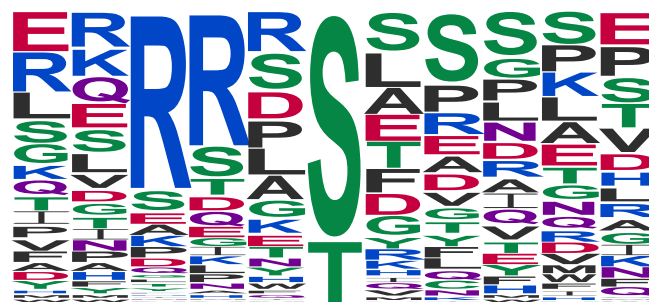

-5 -4 -3 -2 -1 0 1 2 3 4 5

..R..[ST]..... (79)  
 ...R.[ST]..... (52)

42      131/615      13      0.66



PRKG1 AGC\_PKG

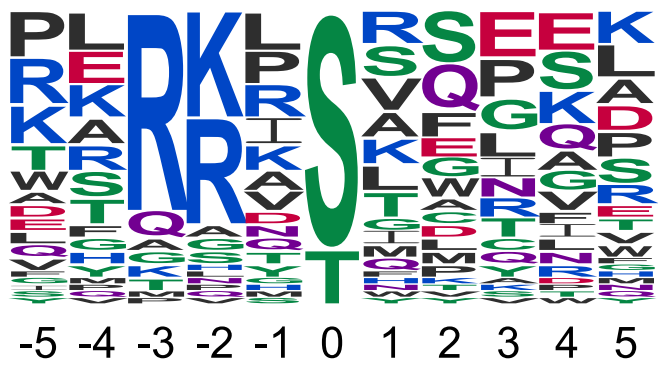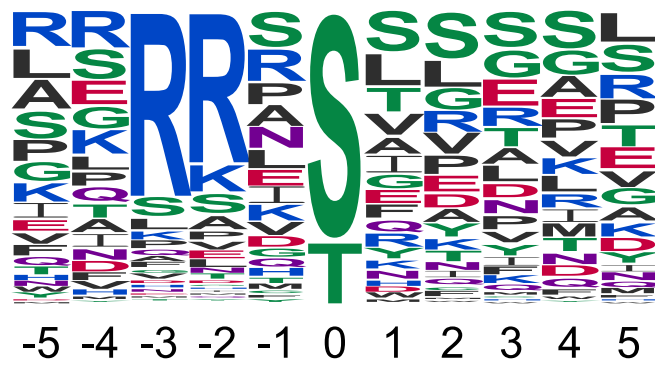

..RR.[ST]..... (31)  
 ..R..[ST]..... (97)  
 ...R.[ST]..... (74)

89 202/790 44 0.66

ROCK2 AGC\_DMPK

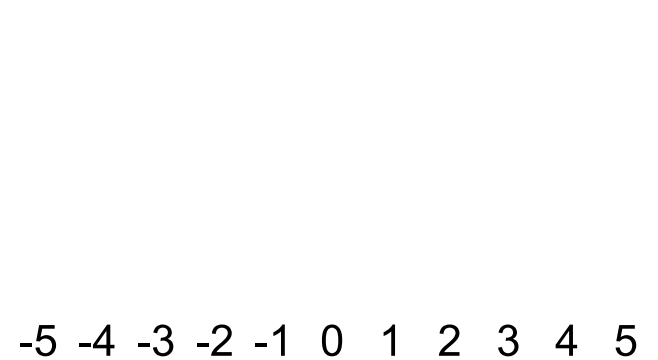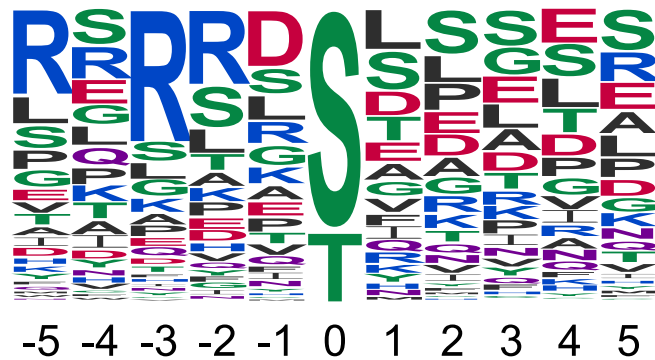

..RR.[ST]..... ( 21)  
 ..R..[ST]..... (128)  
 R....[ST]..... ( 71)  
 ....D[ST]..... ( 55)  
 ...R.[ST]..... ( 53)

86 328/795 8 0.66

RPS6KB1 AGC\_RSK

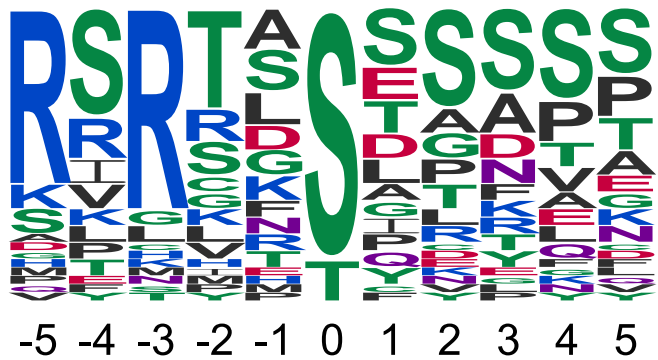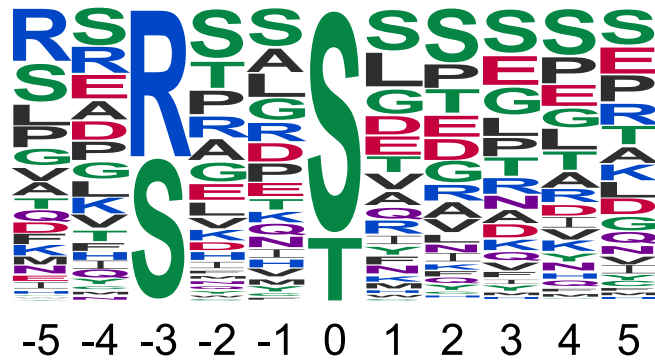

R..RT.[ST]..... ( 12)  
 R..R..[ST]..... ( 41)  
 ..RR.[ST]..... ( 24)  
 ..R..[ST]..... (122)  
 ..S..[ST]..... (192)

138 391/1395 35 0.66

CDK16 CMGC\_CDK

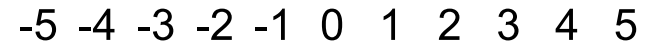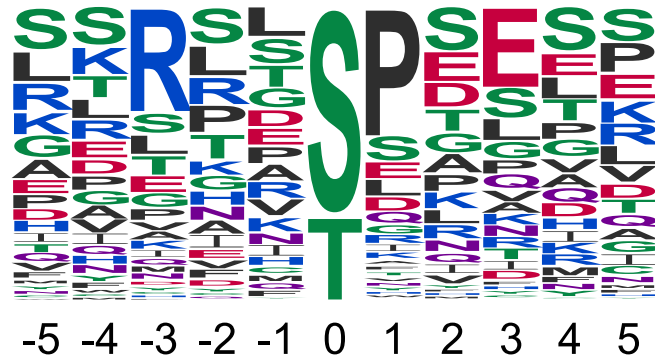

.....[ST]P..... (112)  
 ..R..[ST]..... ( 81)  
 .....[ST]...E... ( 61)

56 254/673 1 0.65

CDK20 CMGC\_CDK

-5 -4 -3 -2 -1 0 1 2 3 4 5

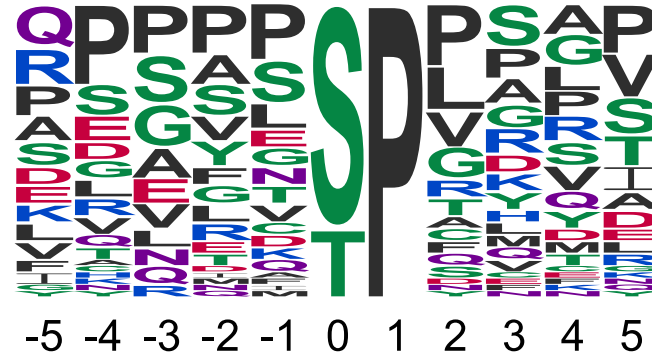

.....[ST]P.... (47)

16

47/195

2

0.65

DYRK1B CMGC\_DYRK

-5 -4 -3 -2 -1 0 1 2 3 4 5

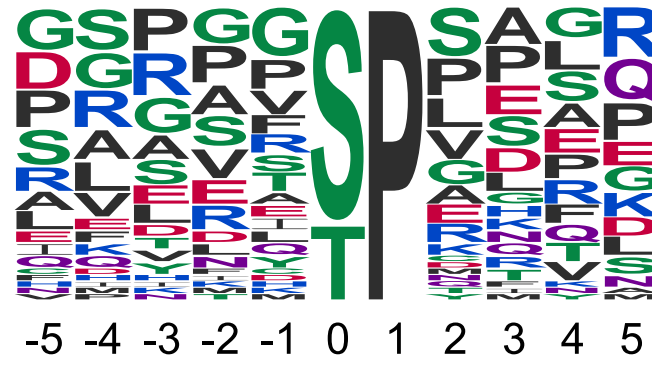

.....[ST]P.... (46)

16

46/149

7

0.65

DYRK2 CMGC\_DYRK

-5 -4 -3 -2 -1 0 1 2 3 4 5

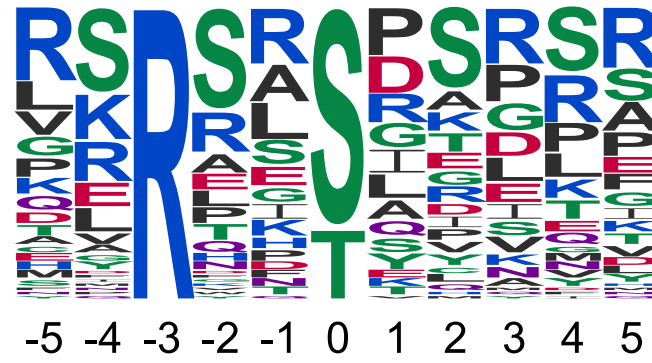

..RS.[ST]....R (12)  
..R..[ST]..... (58)

42

70/512

19

0.65

EIF2AK3 Other\_PEK

-5 -4 -3 -2 -1 0 1 2 3 4 5

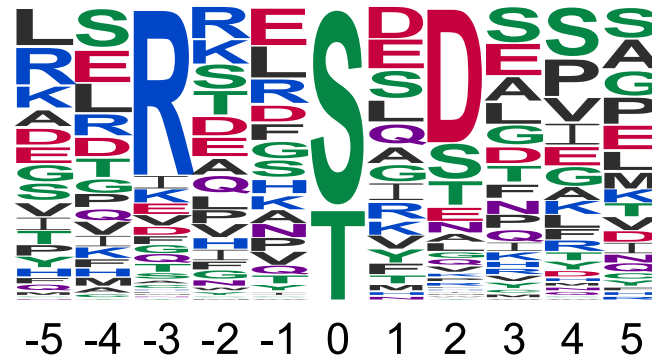

..R..[ST]..... (73)  
.....[ST].D... (54)

94

127/614

2

0.65

FER TK\_Fer

-5 -4 -3 -2 -1 0 1 2 3 4 5

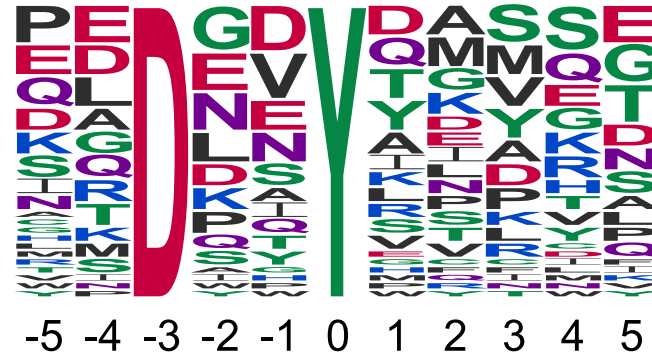

..D..Y..... (37)

32

37/299

8

0.65

MAP3K1 STE\_STE11

-5 -4 -3 -2 -1 0 1 2 3 4 5

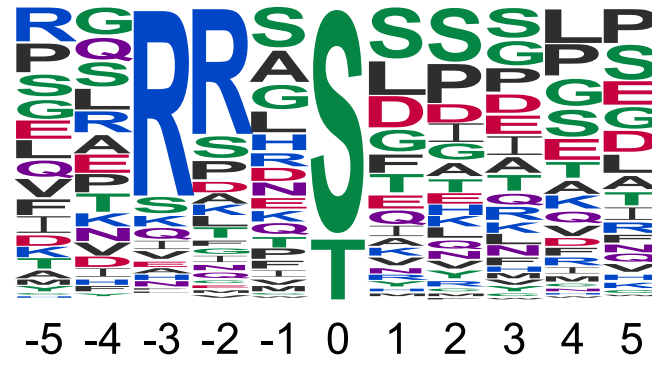

..R..[ST]..... (117)  
...R.[ST]..... ( 64)

95

181/811

5

0.65

MINK1 STE\_STE20

-5 -4 -3 -2 -1 0 1 2 3 4 5

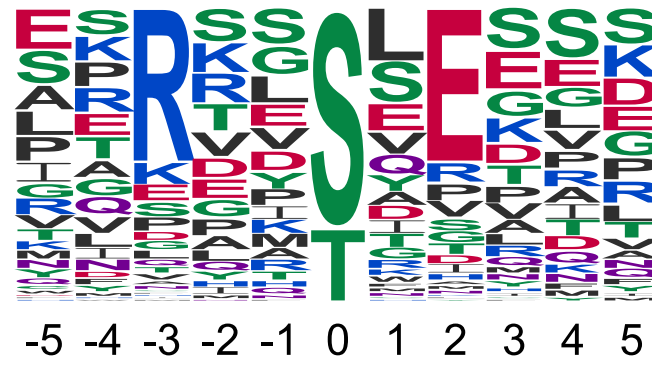

..R..[ST]..... (66)  
.....[ST].E... (60)

36

126/522

0

0.65

MYLK CAMK\_MLCK

-5 -4 -3 -2 -1 0 1 2 3 4 5

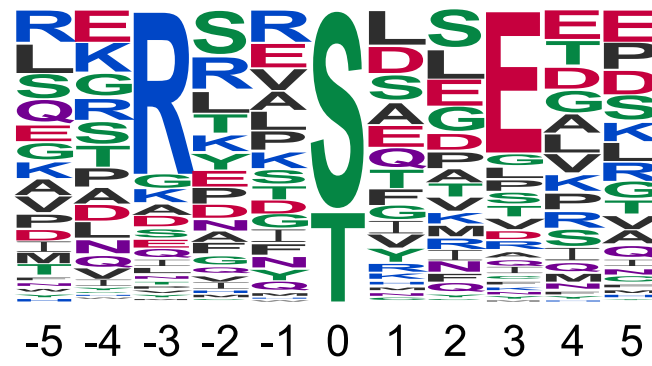

..R..[ST]..... (117)  
.....[ST]..E... ( 90)

99

207/894

2

0.65

PDK1 Atypical\_PDHK

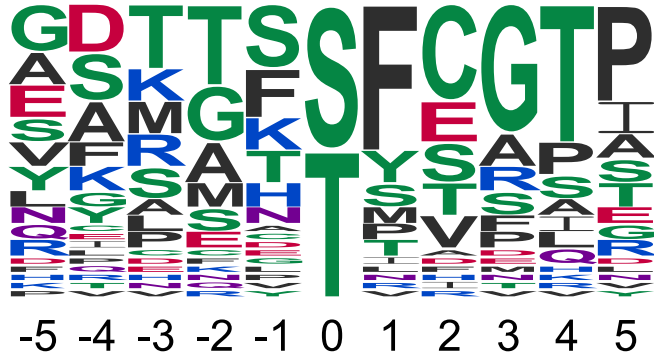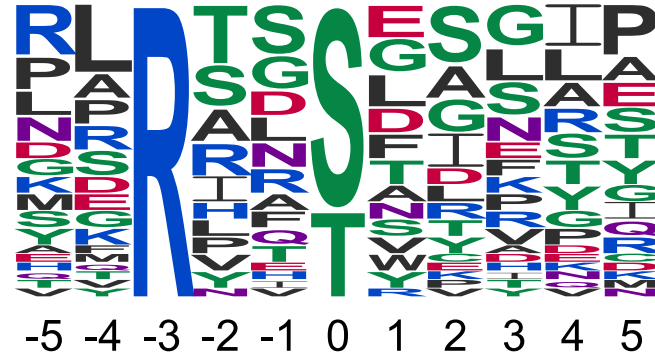

..R..[ST]..... (34)

28

34/247

36

0.65

PDK3 Atypical\_PDHK

-5 -4 -3 -2 -1 0 1 2 3 4 5

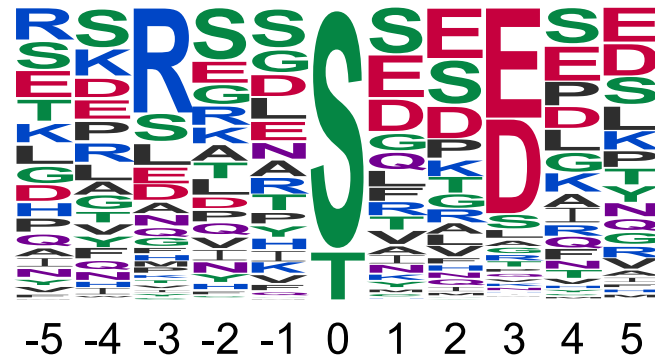

.....[ST]..D.Y ( 10)  
.....[ST]E.E.. ( 24)  
..R..[ST]..... (104)  
.....[ST]..D.. ( 75)  
.....[ST]..E.. ( 73)

103

286/831

2

0.65

PKMYT1 Other\_WEE

-5 -4 -3 -2 -1 0 1 2 3 4 5

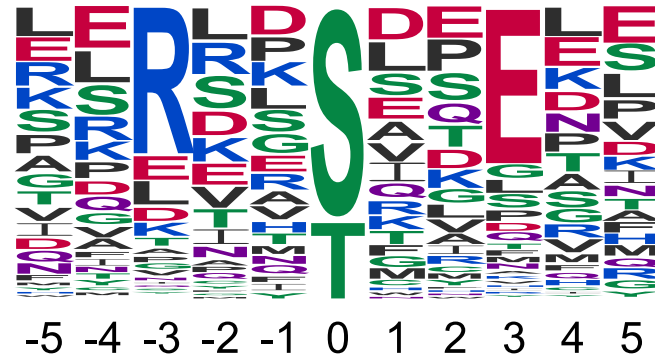

..R..[ST]..... (90)  
.....[ST]..E.. (88)

64

178/780

2

0.65

RPS6KA1 AGC\_RSK

-5 -4 -3 -2 -1 0 1 2 3 4 5

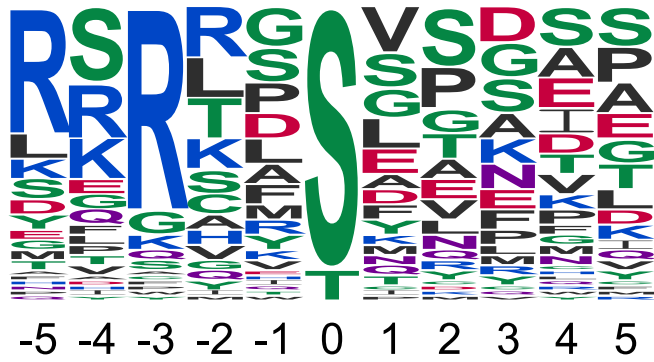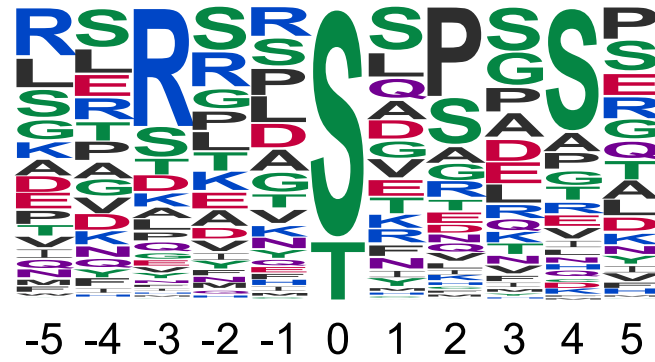

R..R..[ST]..... ( 36)  
..RR.[ST]..... ( 17)  
..R..[ST]..... ( 71)  
.....[ST]...S. (110)  
.....[ST].P... ( 69)

71

303/752

58

0.65

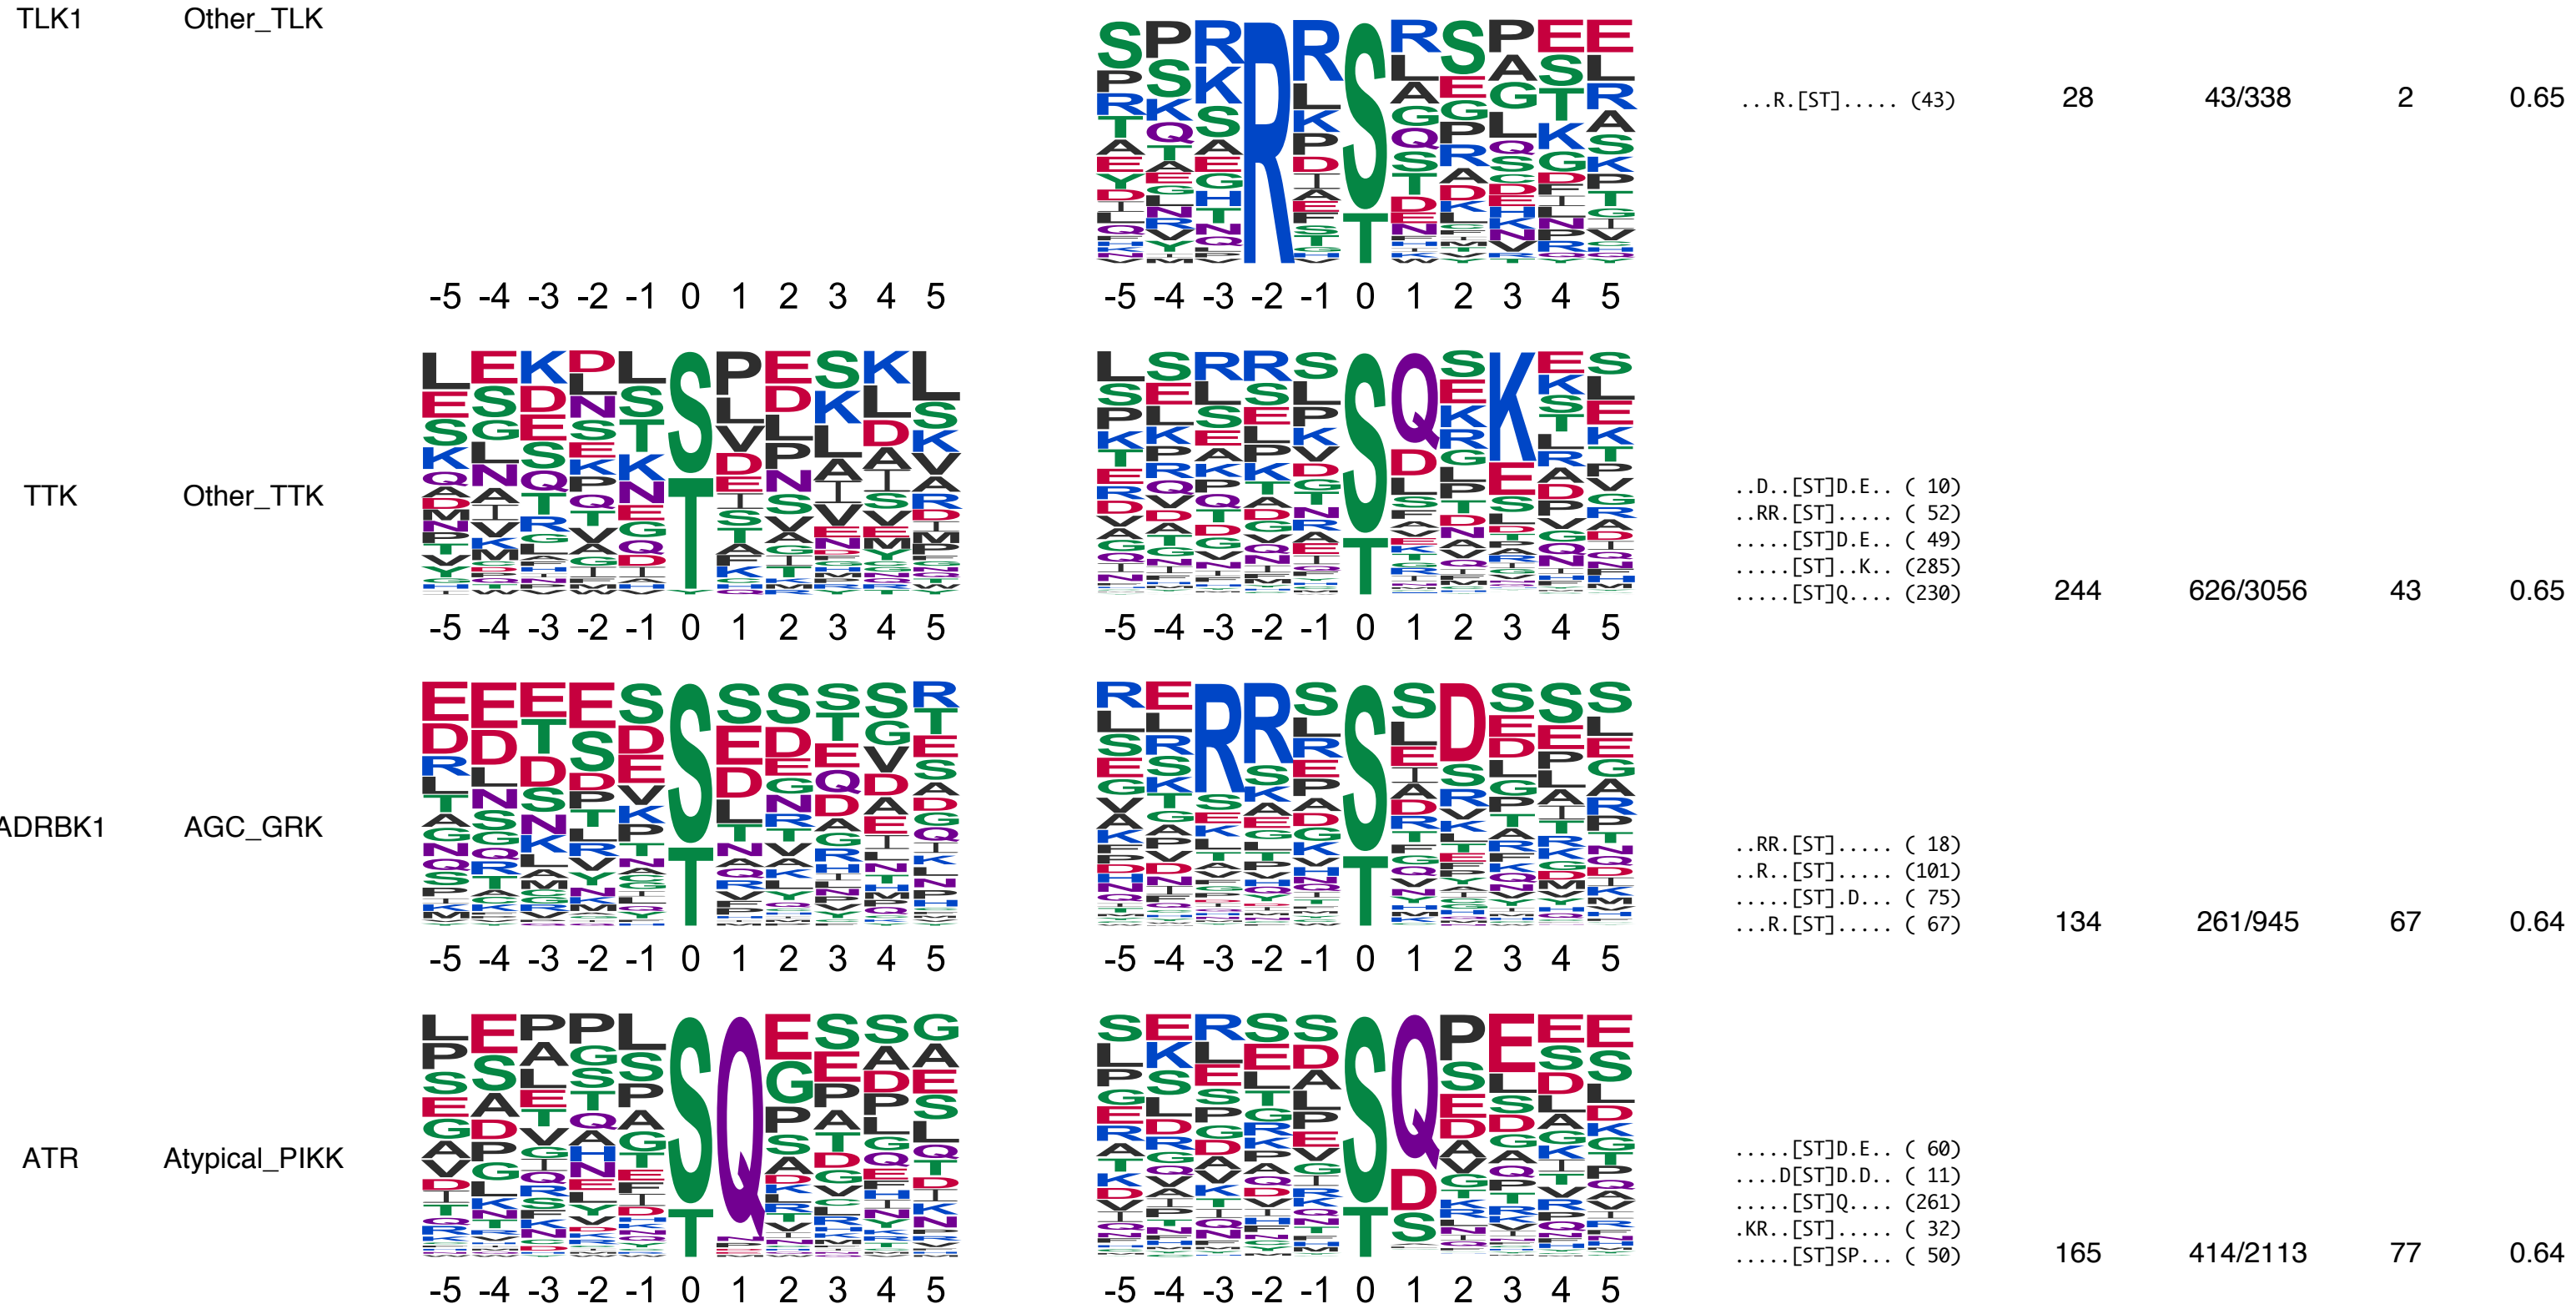

BMPR1B

TKL\_STKR

-5 -4 -3 -2 -1 0 1 2 3 4 5

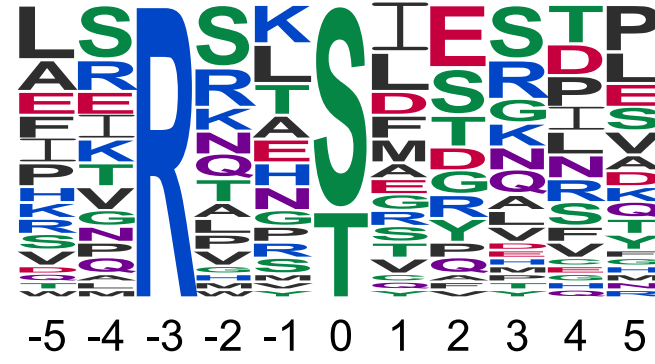

..R..[ST]..... (37)

47

37/249

10

0.64

BRAF

TKL\_RAF

-5 -4 -3 -2 -1 0 1 2 3 4 5

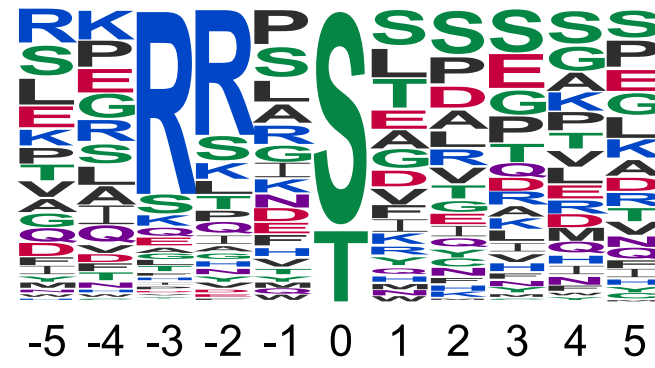

..R..[ST]..... (123)

...R.[ST]..... ( 71)

87

194/918

12

0.64

BRSK2

CAMK\_CAMKL

-5 -4 -3 -2 -1 0 1 2 3 4 5

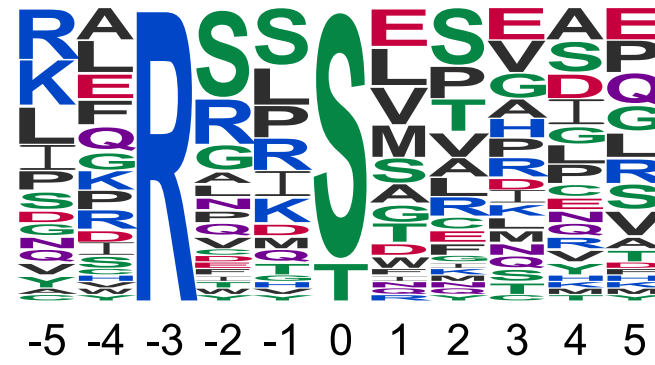

..R..[ST]..... (45)

24

45/230

1

0.64

CHEK2

CAMK\_RAD53

-5 -4 -3 -2 -1 0 1 2 3 4 5

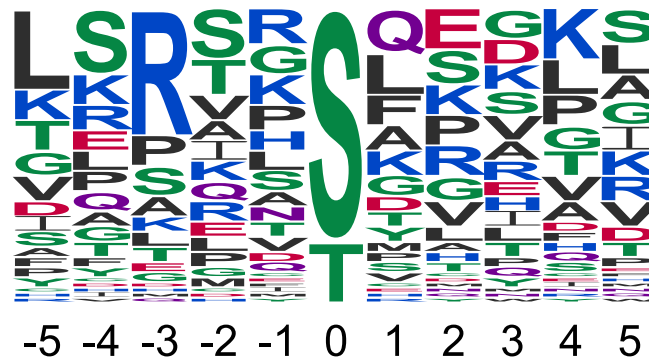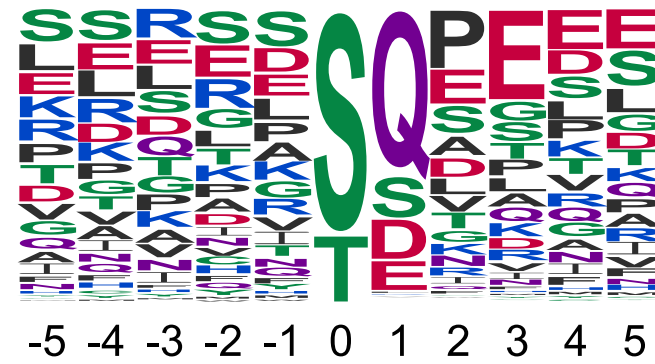

.....[ST]D.E... ( 55)

.....[ST]Q..... (232)

.....[ST]SP... ( 53)

..RR.[ST]..... ( 25)

.....[ST]E.E... ( 40)

165

405/2032

58

0.64

CSNK1A1

CK1\_CK1

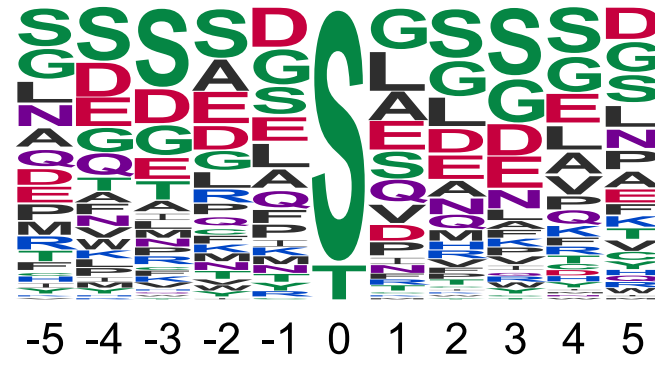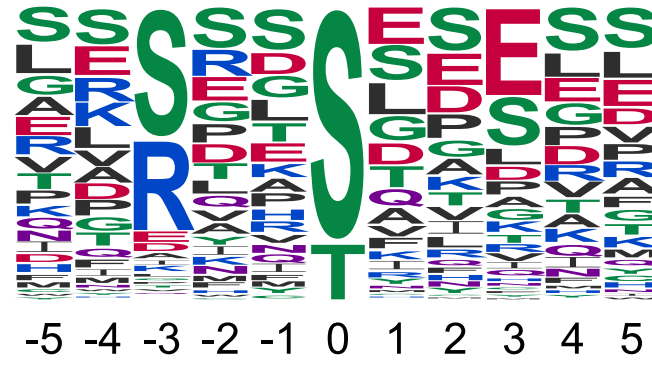

..RR.[ST]..... ( 18)  
 ..S..[ST]..... (145)  
 ..R..[ST]..... ( 83)  
 .....[ST]..E.. ( 76)

71 322/874 100 0.64

CSNK1E

CK1\_CK1

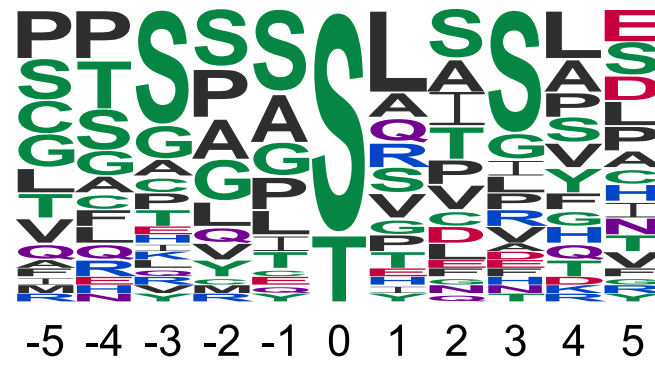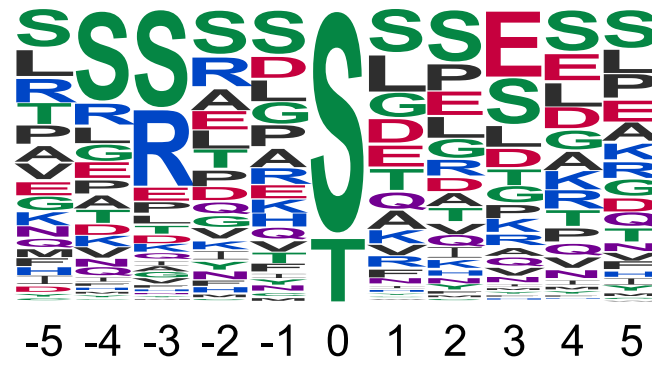

..RR.[ST]..... ( 20)  
 ..S..[ST]..... (168)  
 ..R..[ST]..... (109)  
 .S..[ST]..... (118)  
 .....[ST]..E.. ( 75)

97 490/1033 35 0.64

ICK

CMGC\_RCK

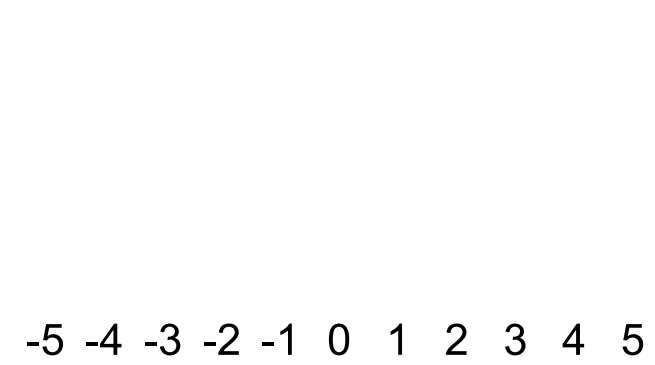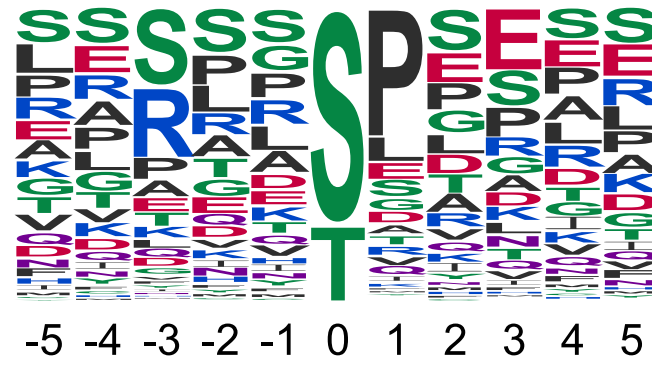

.....[ST]P.... (222)  
 ..R..[ST]..... ( 94)  
 .....[ST]..E.. ( 89)  
 ..S..[ST]..... (102)

148 507/1013 3 0.64

MAPK3

CMGC\_MAPK

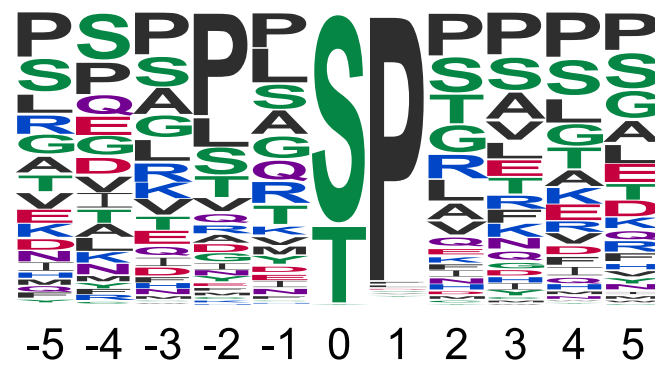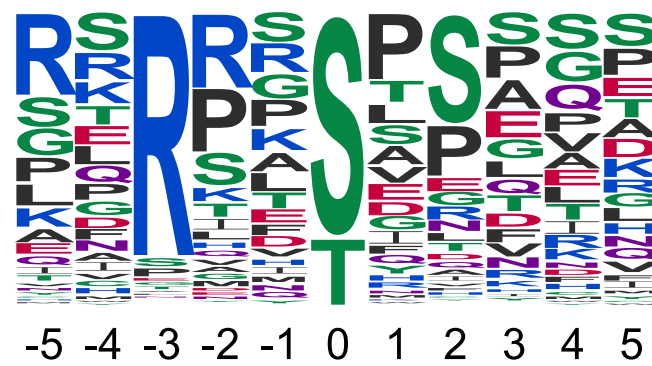

...P.[ST]P..Q. (13)  
 ...P.[ST]PP... (23)  
 ..RR.[ST]..... (46)  
 ..R..[ST].S... (74)  
 R.R..[ST]..... (39)

305 207/3404 251 0.64

MARK2 CAMK\_CAMKL

-5 -4 -3 -2 -1 0 1 2 3 4 5

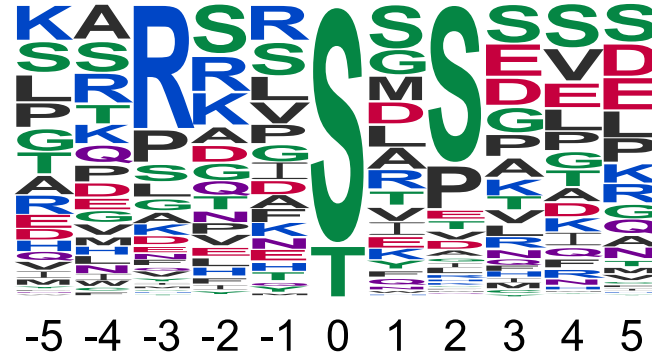

..RR.[ST]..... ( 18)  
 ....V[ST].P.V. ( 12)  
 K..K.[ST].P... ( 13)  
 ..R..[ST]..... ( 90)  
 .....[ST].S... (120)

57 253/768 14 0.64

OBSCN CAMK\_Trio

-5 -4 -3 -2 -1 0 1 2 3 4 5

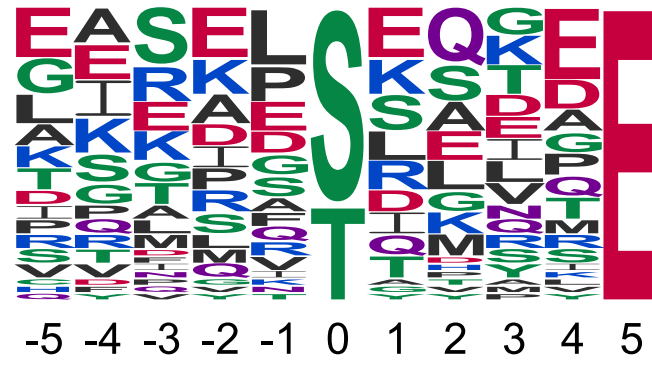

.....[ST]....E (40)

18 40/253 0 0.64

PAK1 STE\_STE20

-5 -4 -3 -2 -1 0 1 2 3 4 5

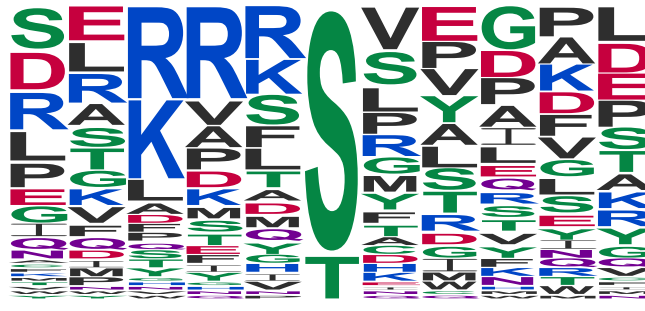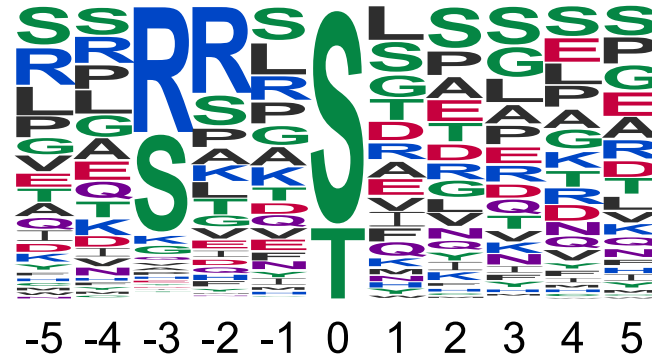

R..R.[ST]..S.. ( 10)  
 ..RR.[ST]..... ( 27)  
 ..R..[ST]..... (184)  
 ...R.[ST]..... (126)  
 ..S..[ST]..... (163)

111 510/1399 66 0.64

PRKCI AGC\_PKC

-5 -4 -3 -2 -1 0 1 2 3 4 5

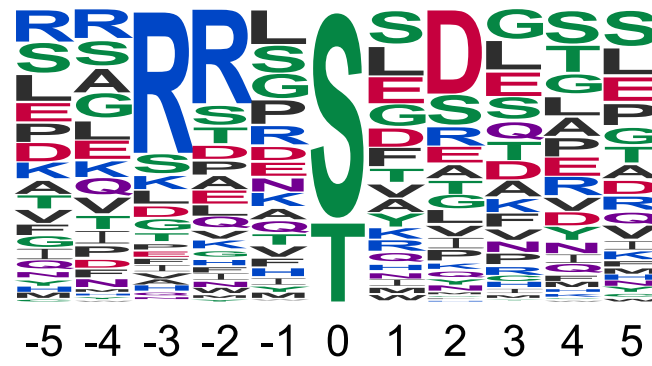

..RR.[ST]..... ( 18)  
 ..R..[ST]..... (102)  
 ...R.[ST]..... ( 59)  
 .....[ST].D... ( 64)

95 243/794 18 0.64



PRKCQ

AGC\_PKC

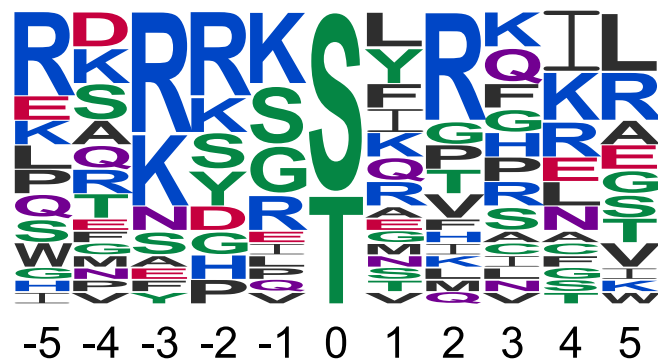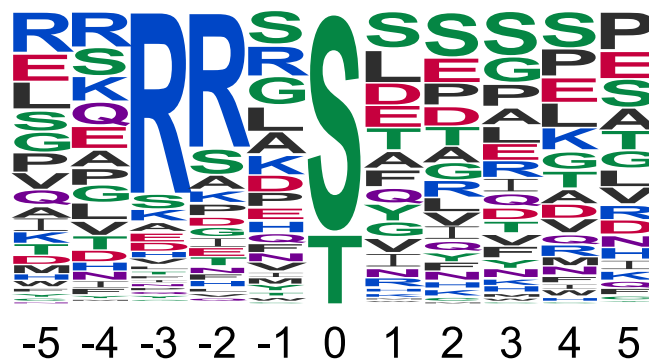

..RR.[ST]..... ( 20)  
 ..R..[ST]..... (119)  
 ...R.[ST]..... ( 84)

87

223/1011

24

0.64

RPS6KA3

AGC\_RSK

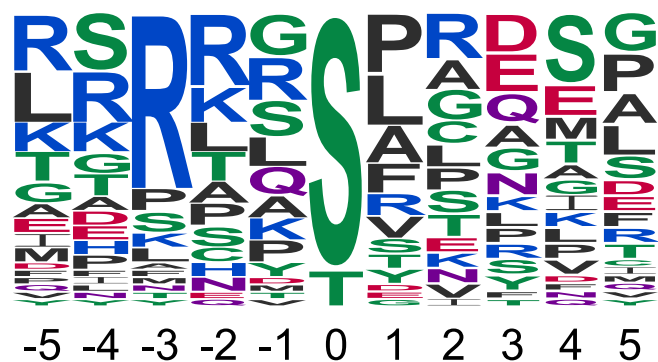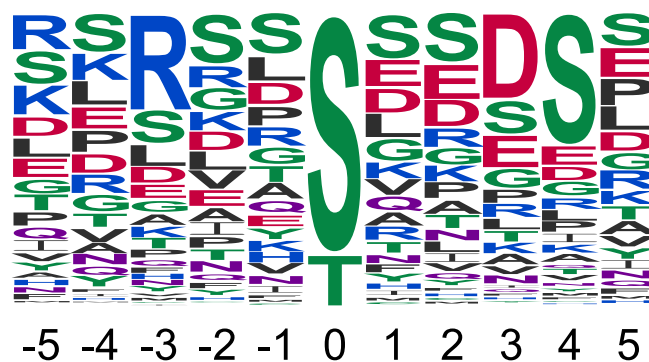

R.R..[ST]..... ( 34)  
 .....[ST]..D.. (136)  
 .....[ST].DE.. ( 23)  
 ..R..[ST]..... (114)  
 .....[ST]...S. (171)

140

478/1285

40

0.64

SIK2

CAMK\_CAMKL

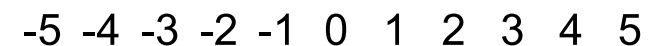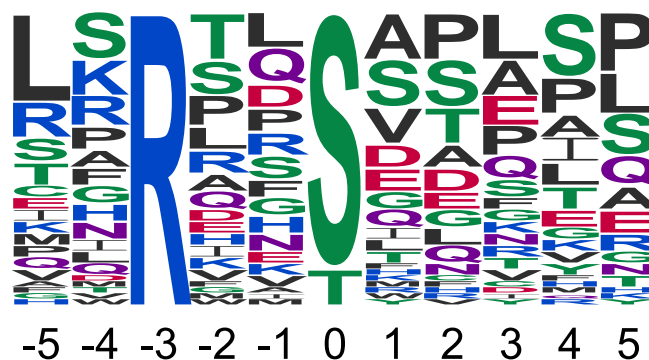

..R..[ST]..... (49)

22

49/253

3

0.64

TEC

TK\_Tec

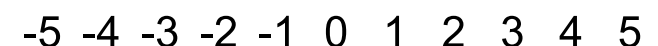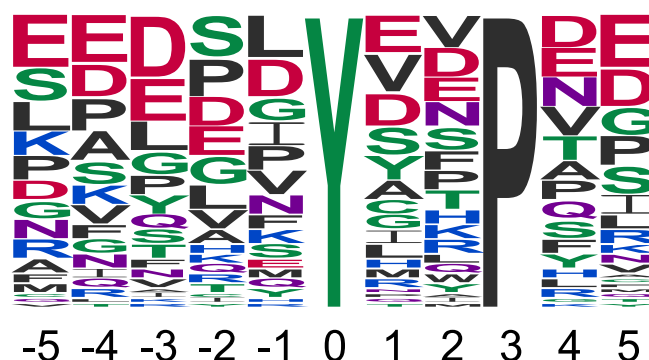

.....Y..P.. (60)

78

60/411

8

0.64

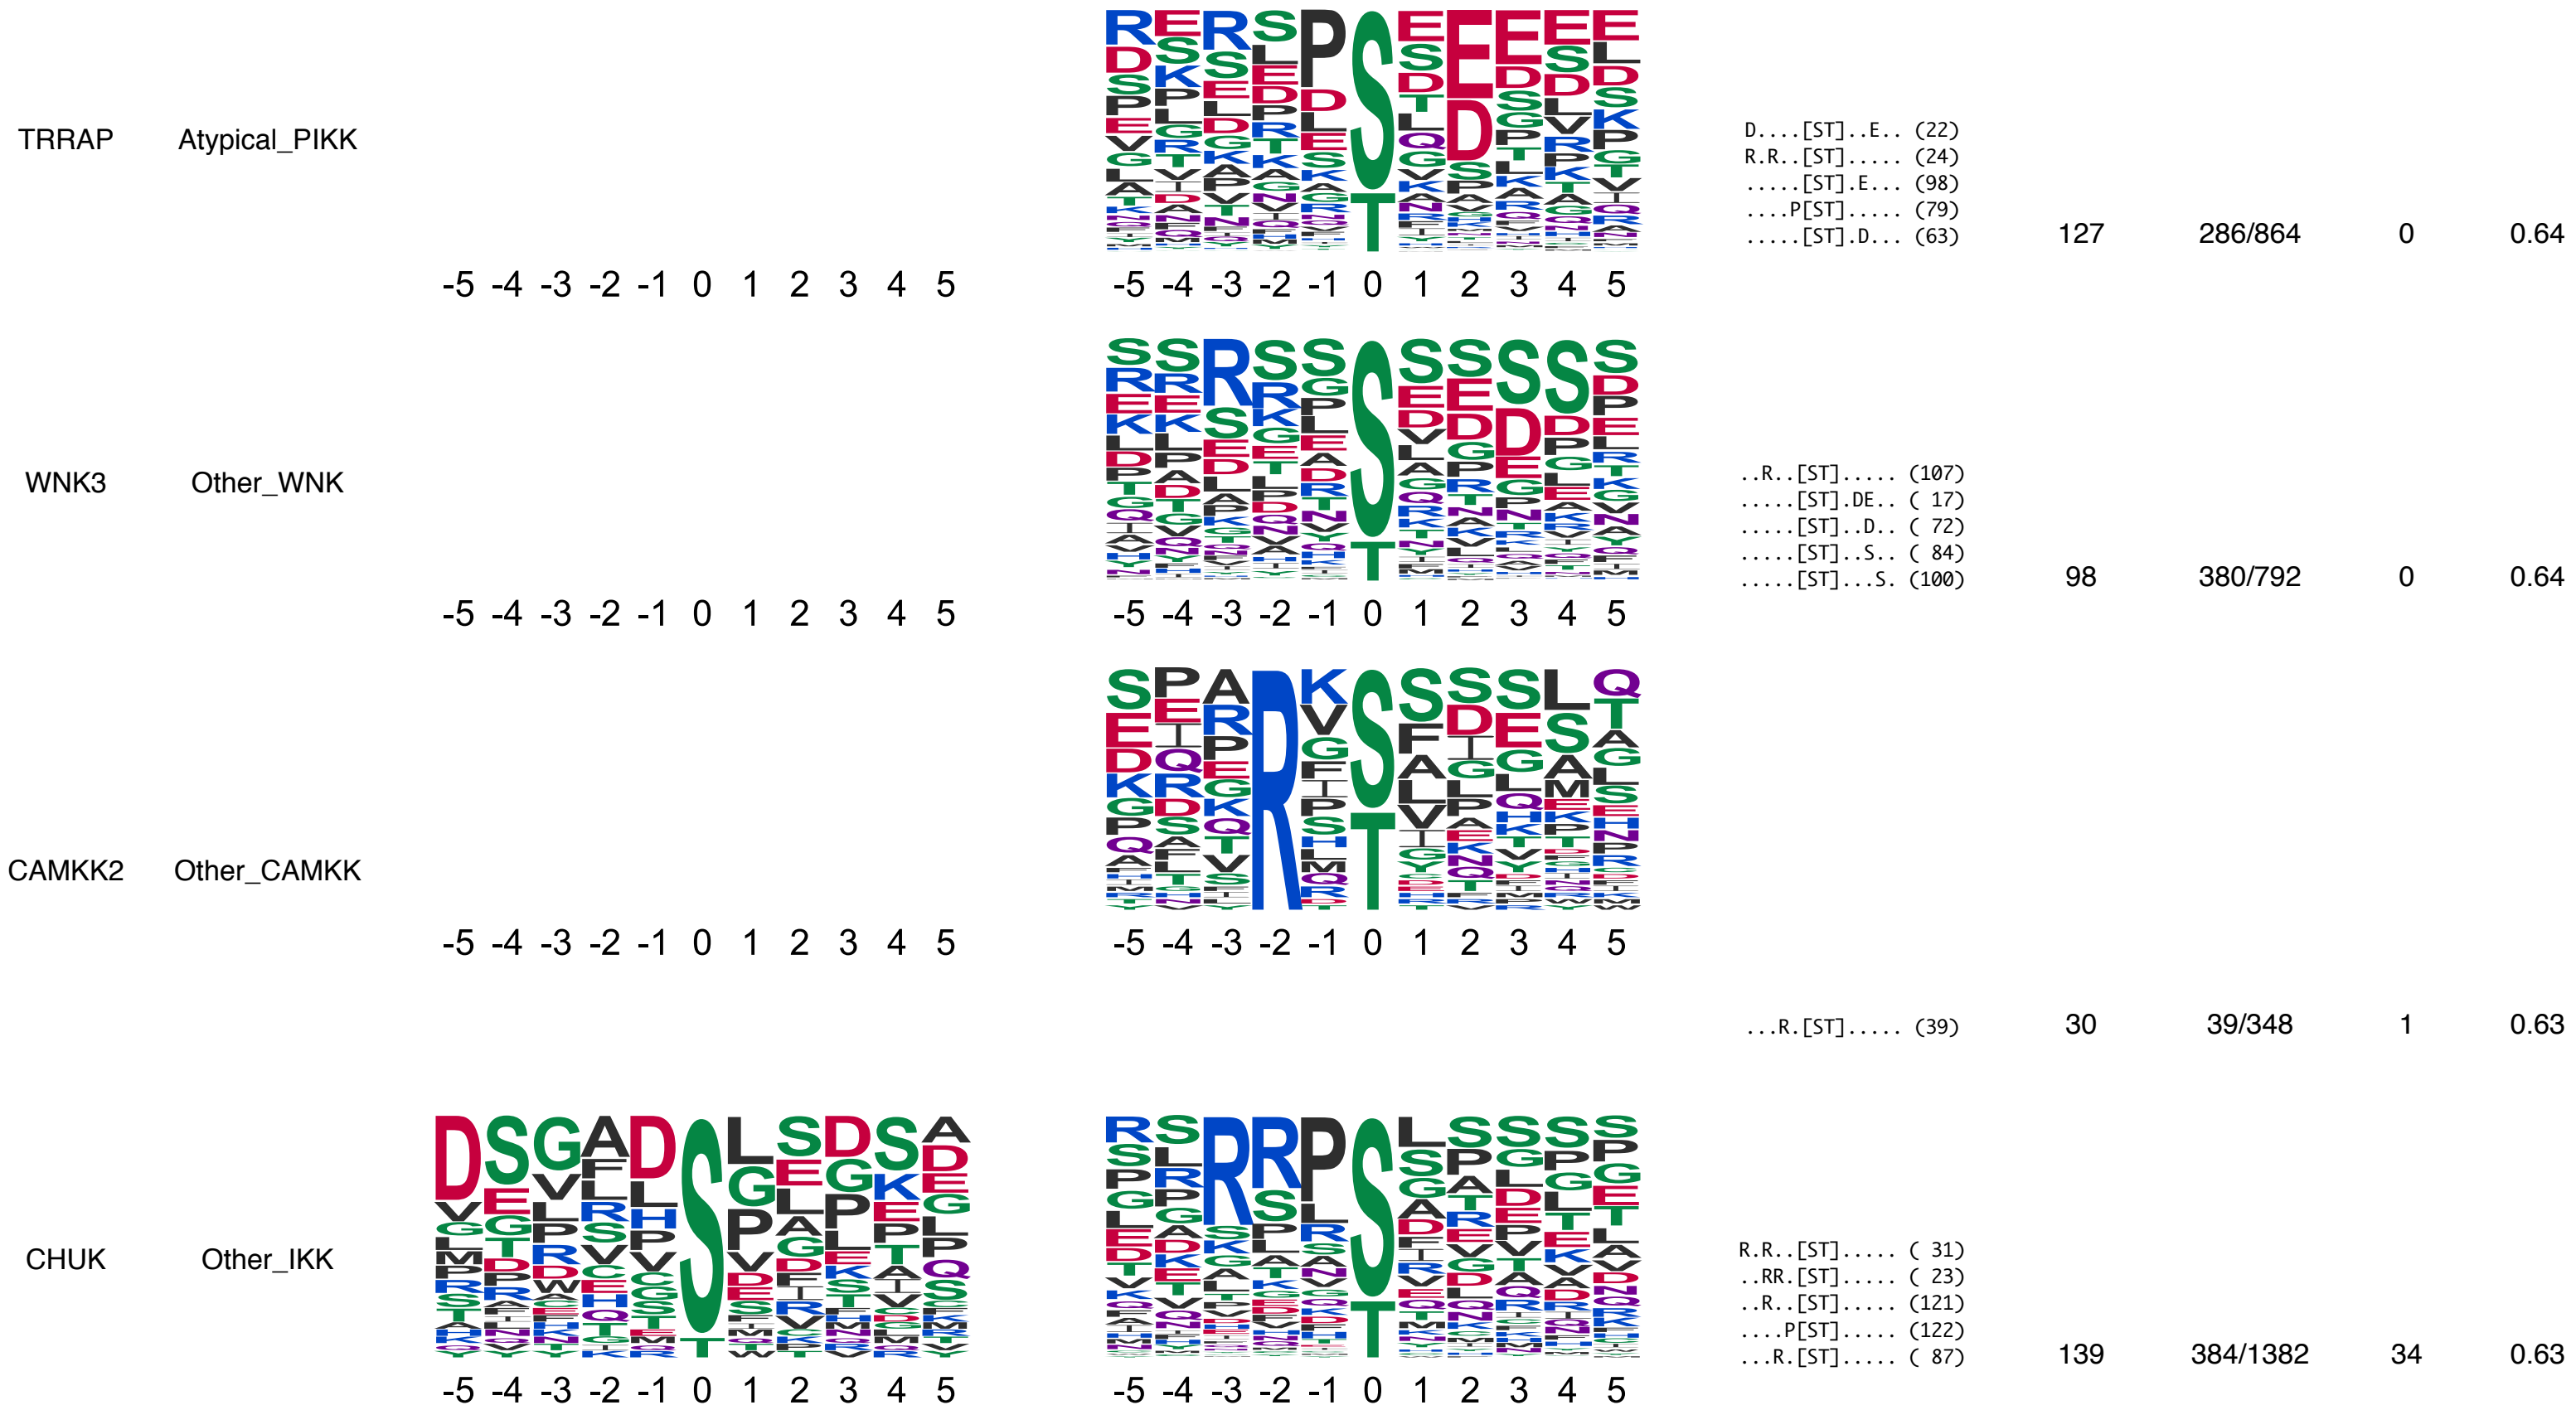

CSF1R TK\_PDGFR

-5 -4 -3 -2 -1 0 1 2 3 4 5

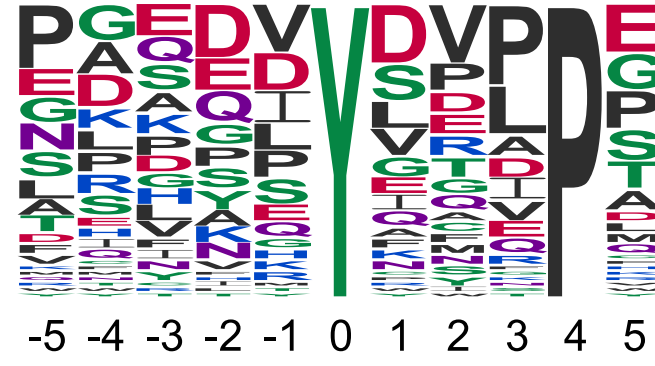

.....Y...P. (54)

167

54/514

4

0.63

CSNK1D CK1\_CK1

-5 -4 -3 -2 -1 0 1 2 3 4 5

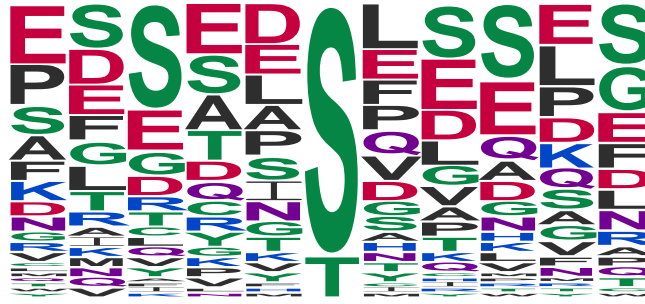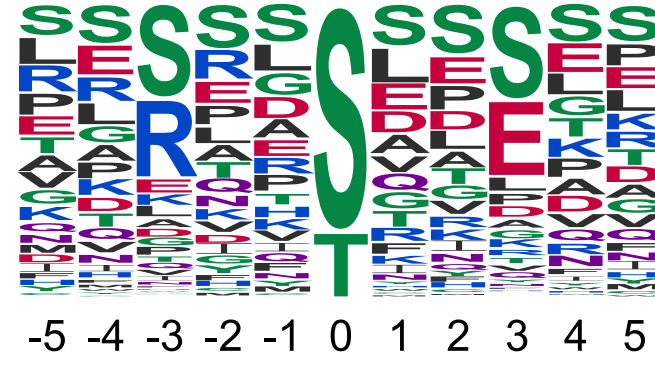

..RR.[ST]..... (26)  
..R..[ST]..... (140)  
.....[ST]..E.. (148)  
..S..[ST]..... (177)  
.....[ST]..S.. (128)

129

619/1333

58

0.63

FGFR2 TK\_FGFR

-5 -4 -3 -2 -1 0 1 2 3 4 5

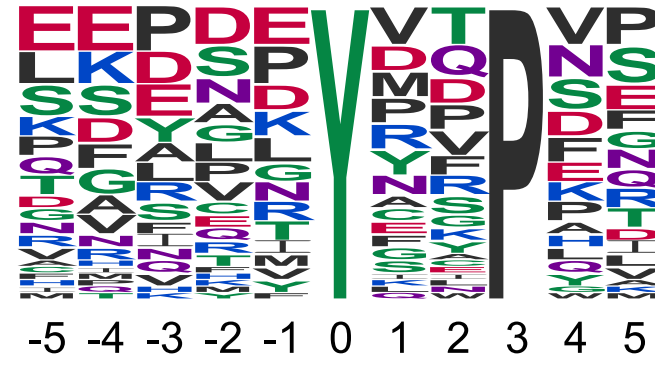

.....Y...P.. (45)

99

45/363

1

0.63

KSR1 TKL\_RAF

-5 -4 -3 -2 -1 0 1 2 3 4 5

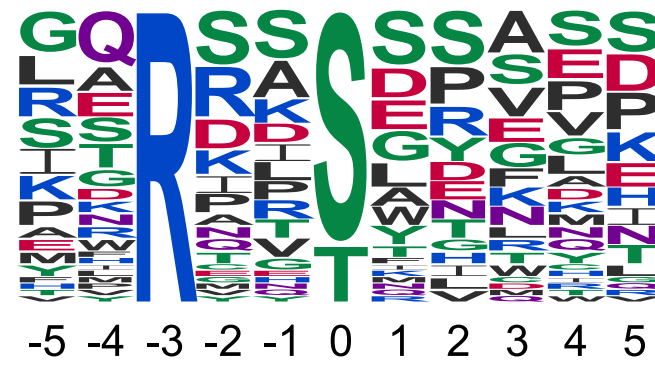

..R..[ST]..... (46)

34

46/293

1

0.63

MAPK11 CMGC\_MAPK

-5 -4 -3 -2 -1 0 1 2 3 4 5

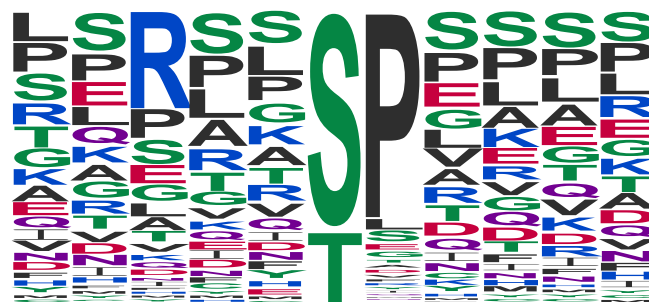

-5 -4 -3 -2 -1 0 1 2 3 4 5

..RI.[ST].S... ( 10)  
...P.[ST]PP... ( 12)  
..RR.[ST]..... ( 31)  
.....[ST]P.... (527)  
..R..[ST]..... (183)

181 763/2030 19 0.63

MAPK9 CMGC\_MAPK

-5 -4 -3 -2 -1 0 1 2 3 4 5

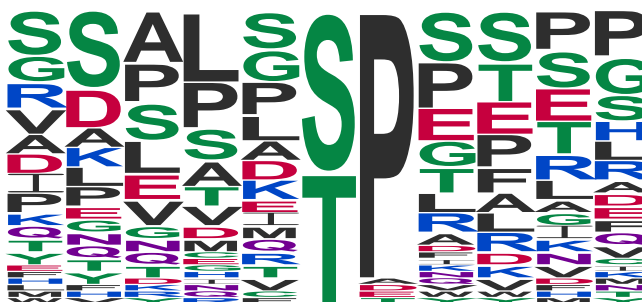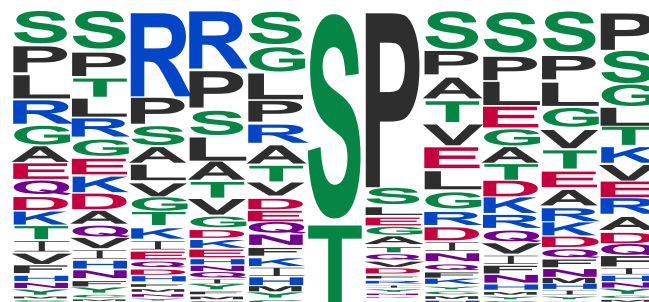

-5 -4 -3 -2 -1 0 1 2 3 4 5

...P.[ST]P..V. ( 16)  
..RR.[ST]..... ( 30)  
.....[ST]P.... (412)  
..R..[ST]..... (156)  
...R.[ST]..... ( 94)

160 708/1710 45 0.63

PIK3CD PKL\_PIK

-5 -4 -3 -2 -1 0 1 2 3 4 5

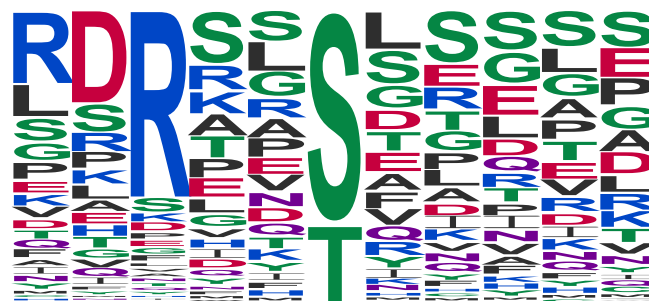

-5 -4 -3 -2 -1 0 1 2 3 4 5

R.RT.[ST]..... ( 14)  
R.R..[ST]..... ( 49)  
..R..[ST]..... (210)  
R..S.[ST]..... ( 35)  
.D...[ST]..... (115)

230 427/1908 1 0.63

PRKCZ AGC\_PKC

-5 -4 -3 -2 -1 0 1 2 3 4 5

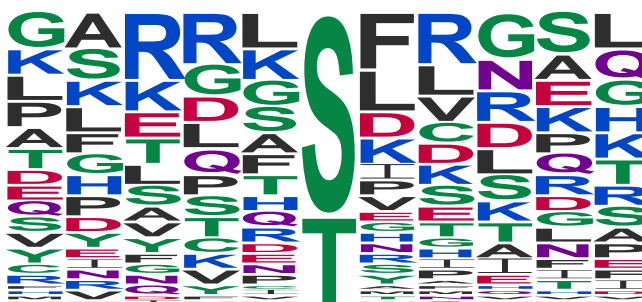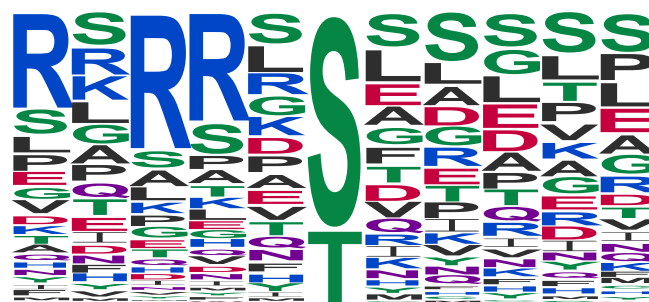

-5 -4 -3 -2 -1 0 1 2 3 4 5

..RR.[ST]..... ( 31)  
R.R..[ST]..... ( 35)  
..R..[ST]..... (158)  
...R.[ST]..... (148)  
R....[ST]..... (107)

151 479/1549 56 0.63

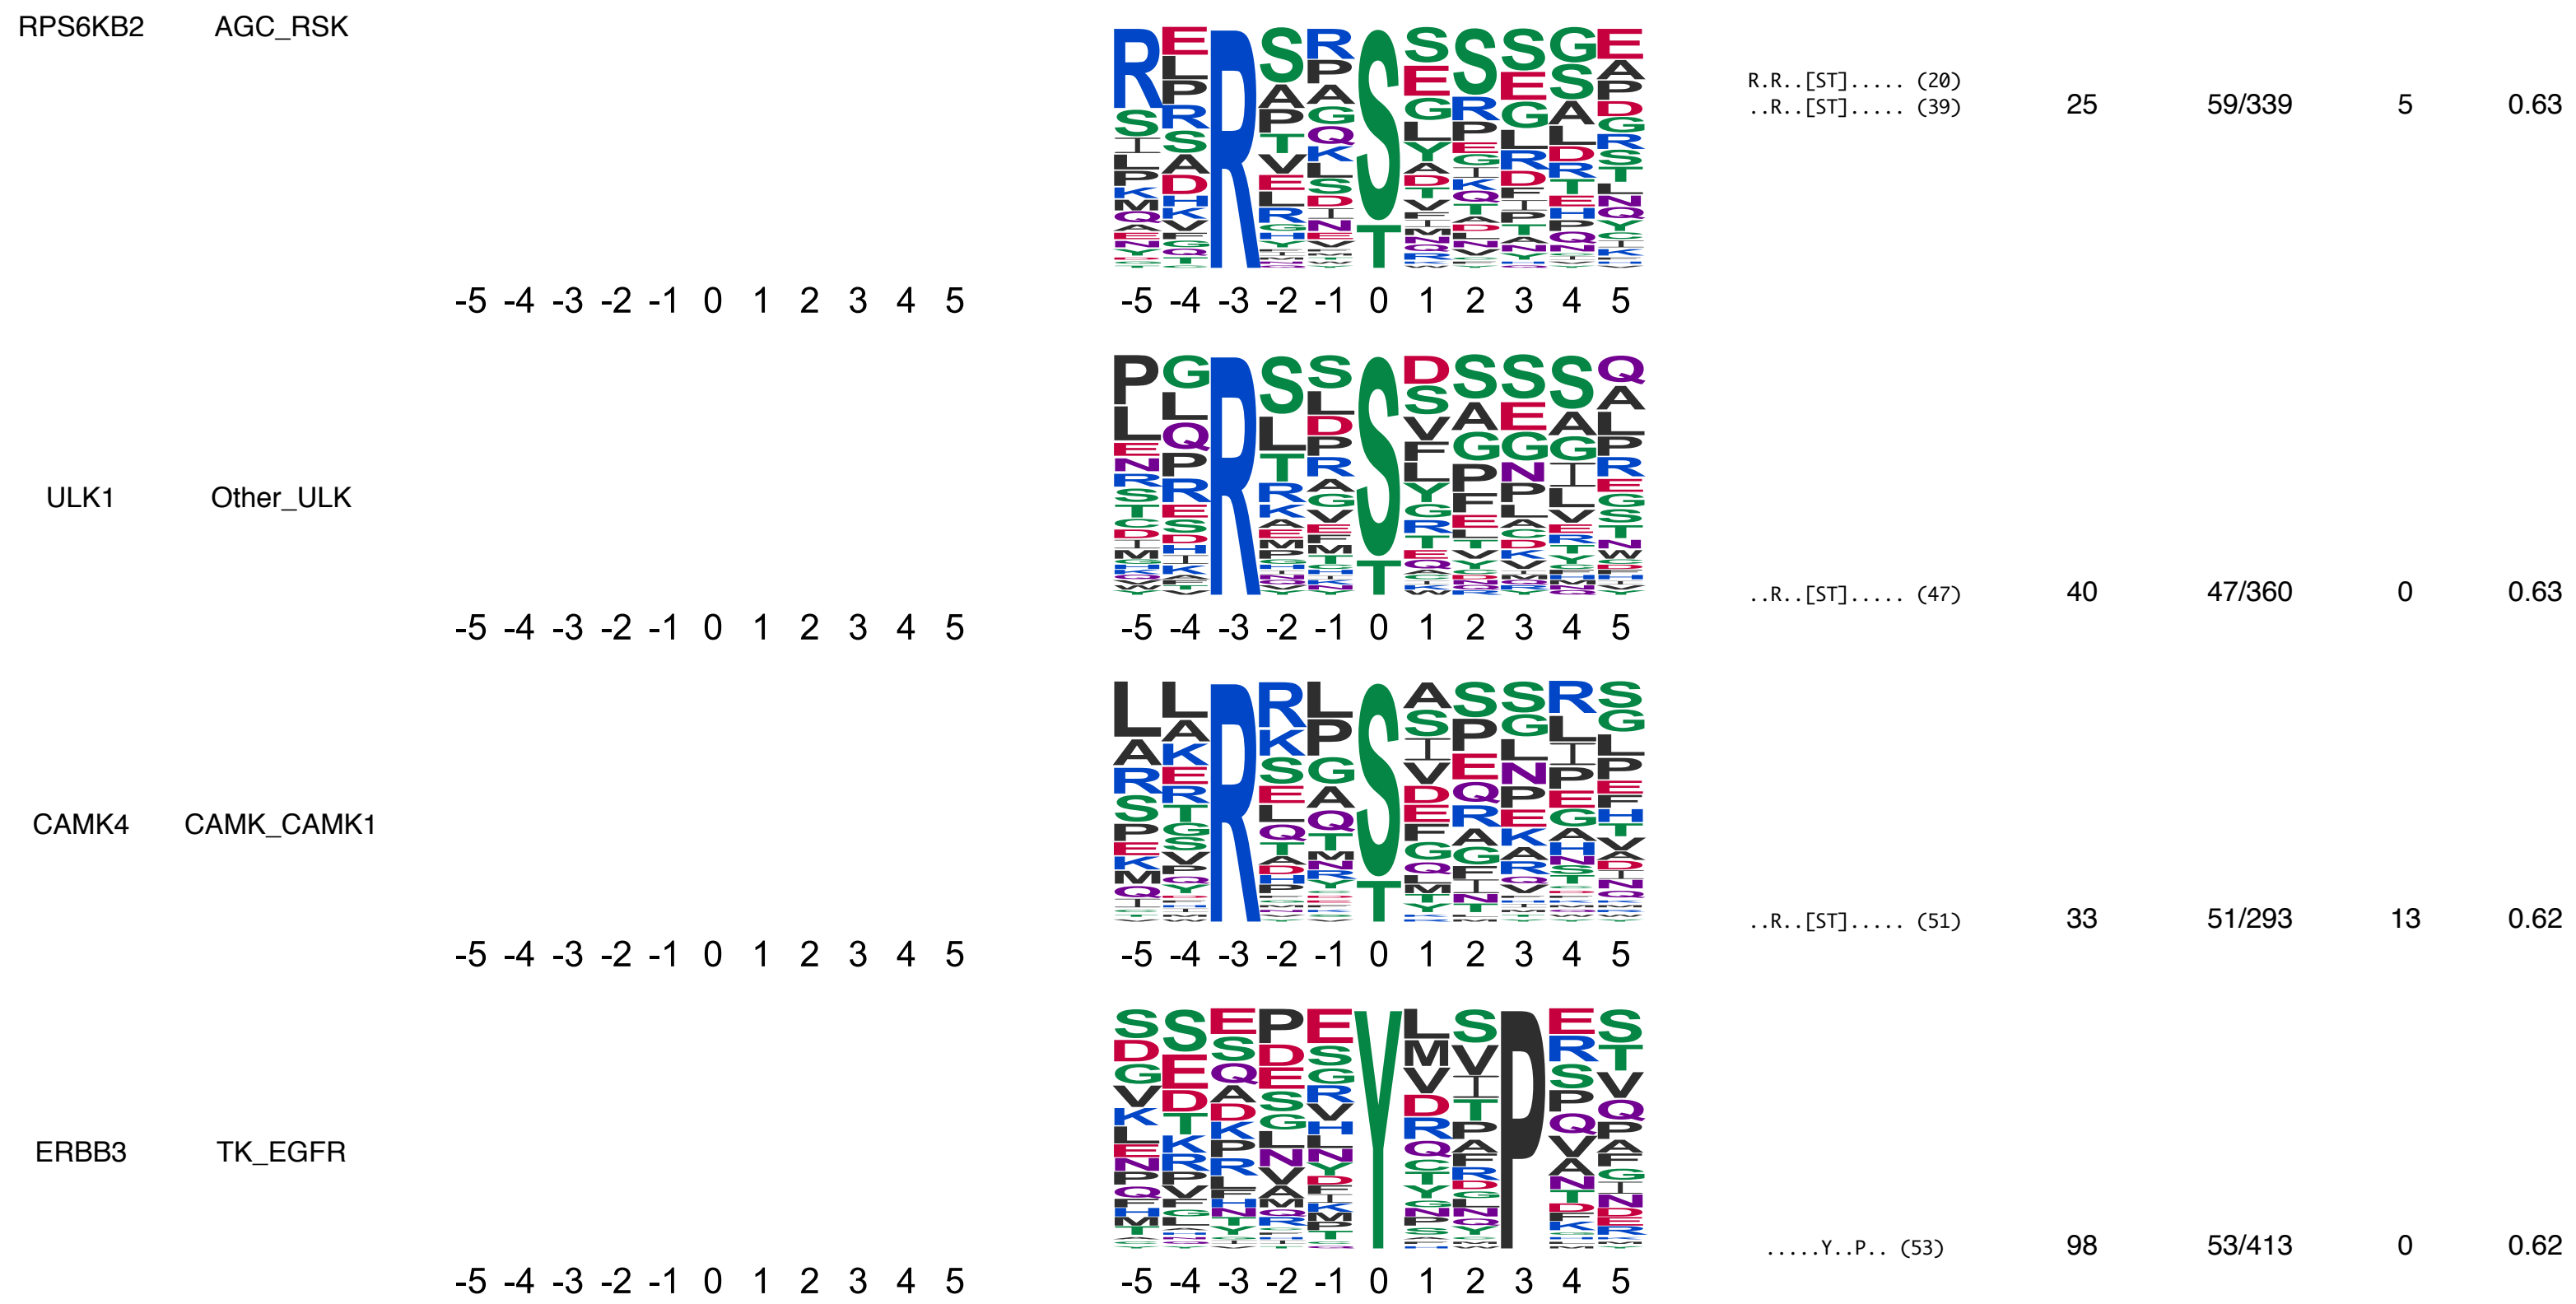

GUCY2D RGC\_RGC

-5 -4 -3 -2 -1 0 1 2 3 4 5

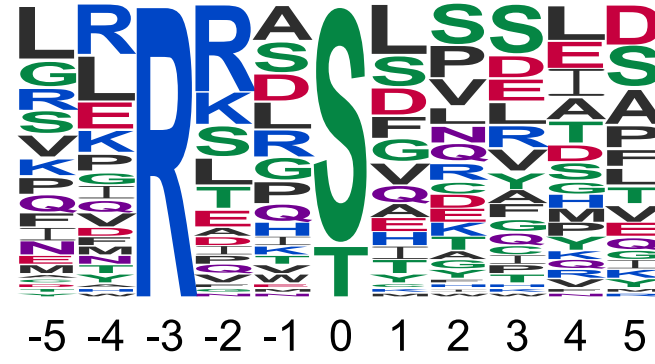

..RR.[ST]..... (19)  
..R..[ST]..... (44)

83

63/298

0

0.62

IRAK1 TKL\_IRAK

-5 -4 -3 -2 -1 0 1 2 3 4 5

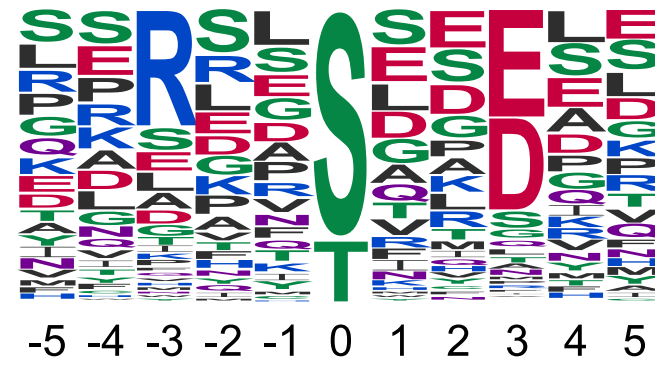

..R..[ST]..... (133)  
.....[ST]..D.. ( 90)  
.....[ST]..E.. (109)

172

332/1146

16

0.62

MAP3K8 STE\_STE-Unique

-5 -4 -3 -2 -1 0 1 2 3 4 5

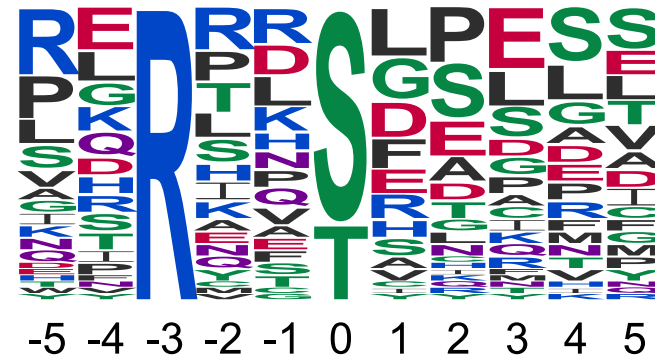

..R..[ST]..... (47)

27

47/315

18

0.62

MARK1 CAMK\_CAMKL

-5 -4 -3 -2 -1 0 1 2 3 4 5

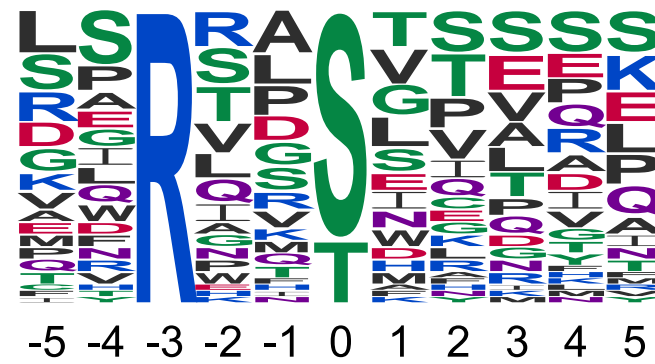

..R..[ST]..... (47)

22

47/348

18

0.62

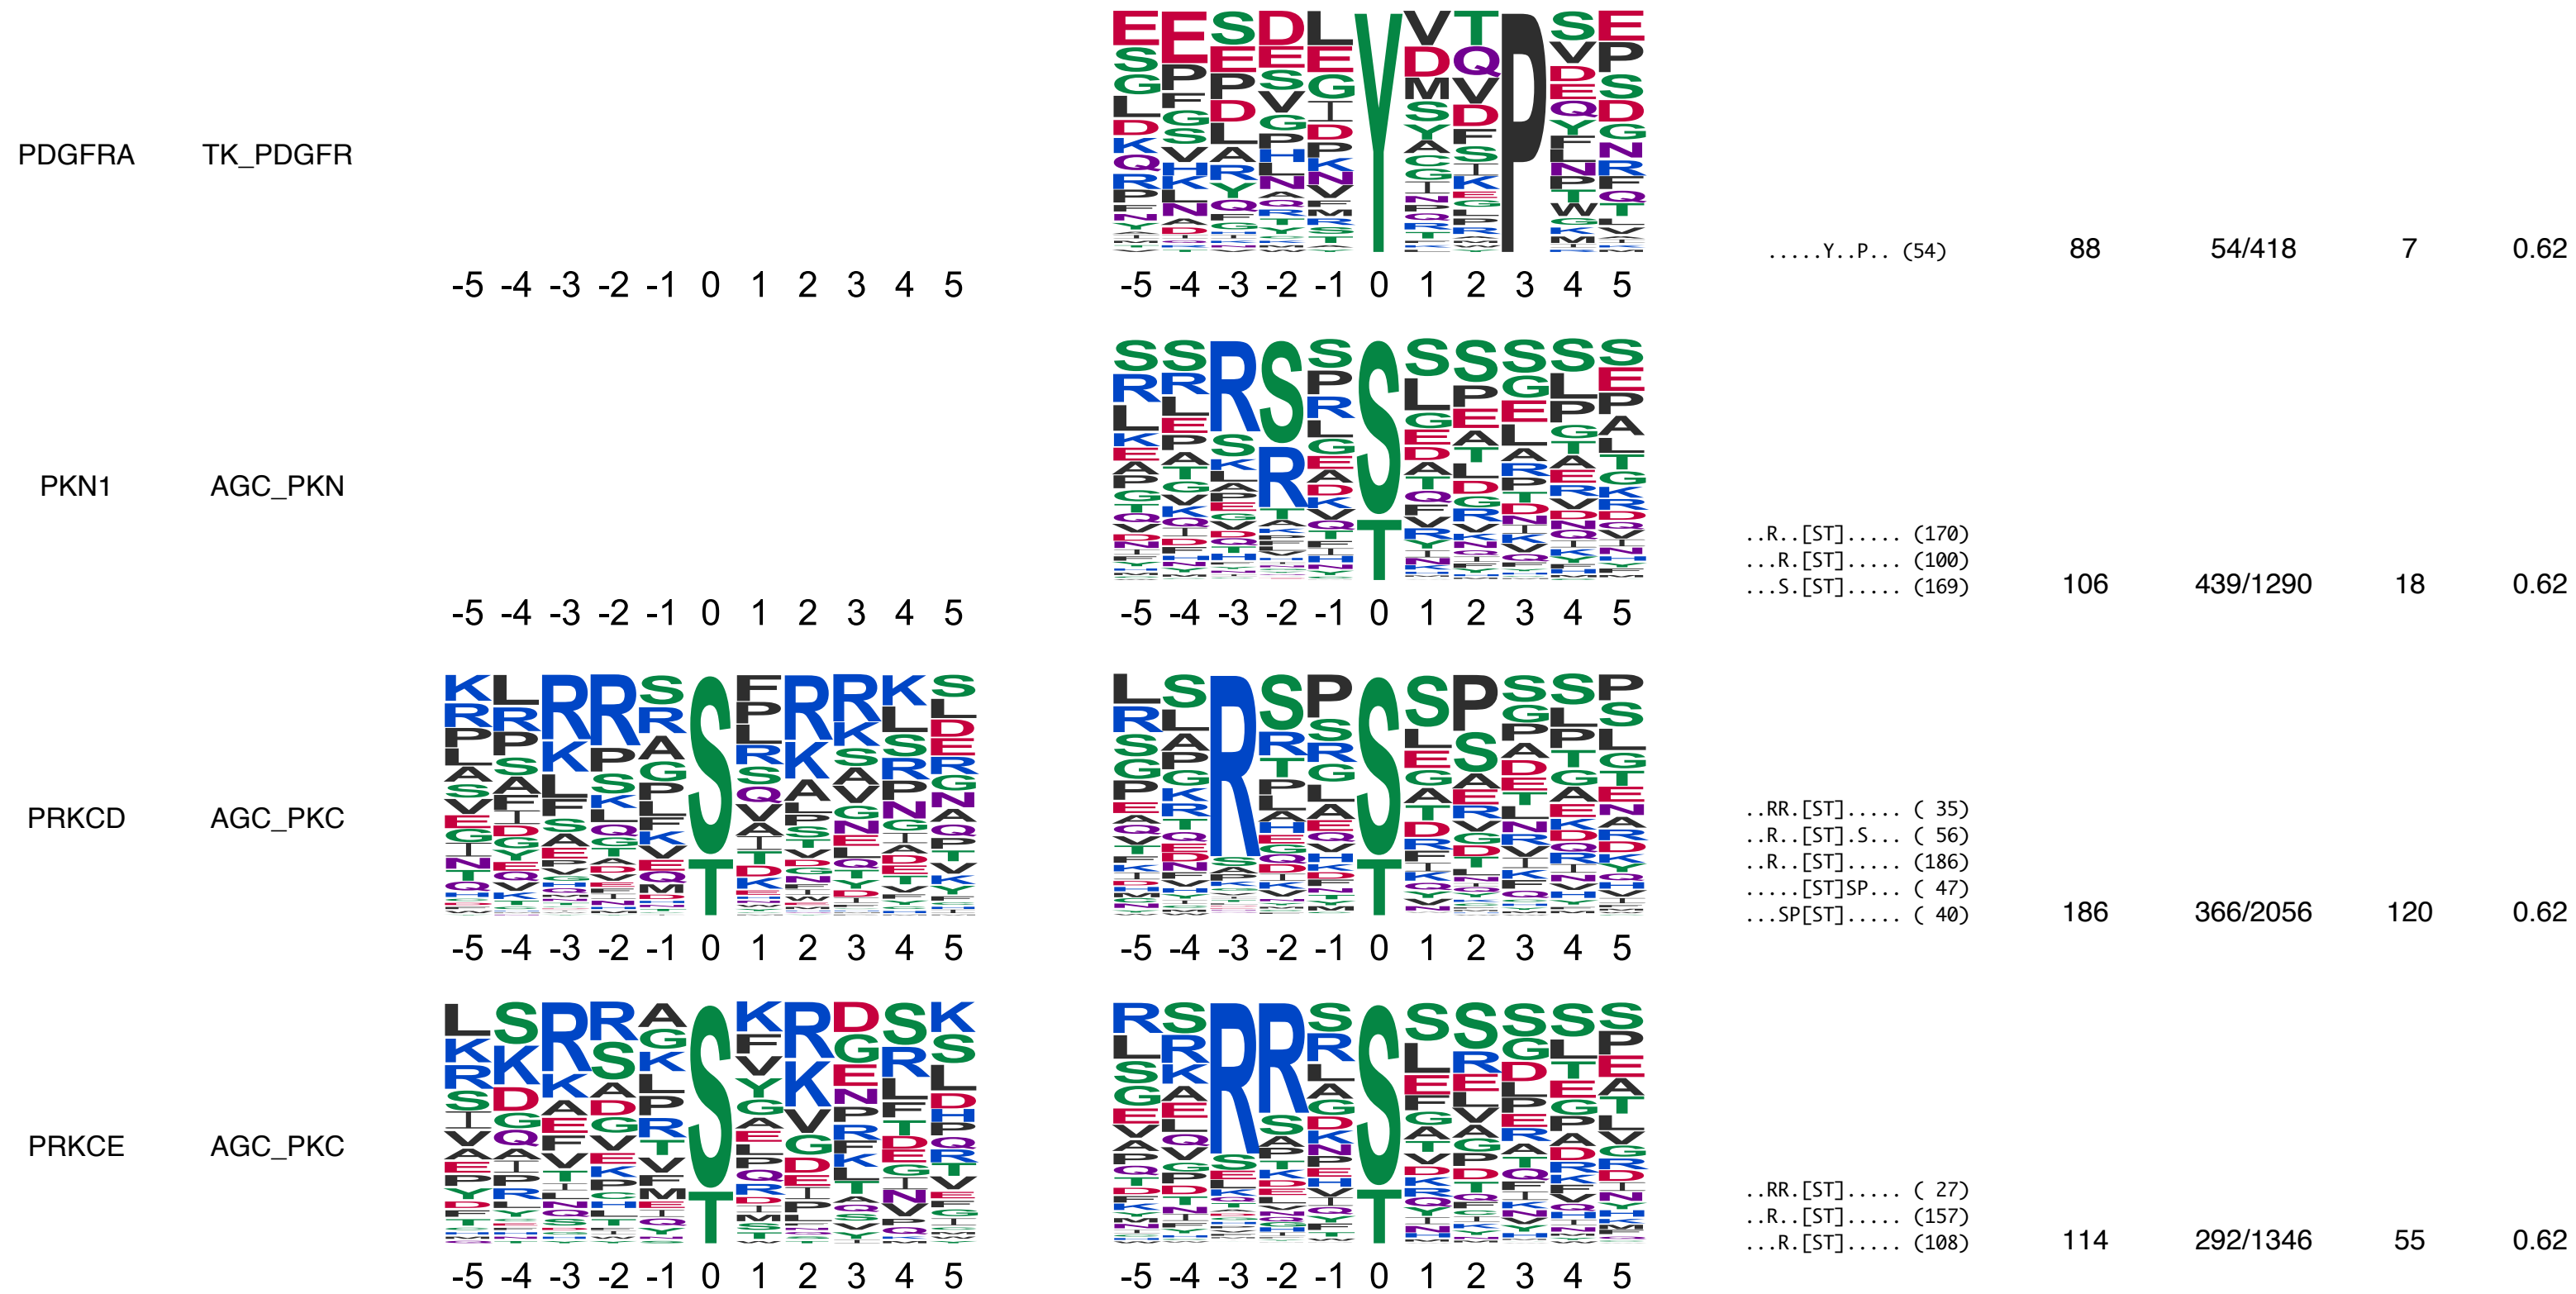

PRKCG

AGC\_PKC

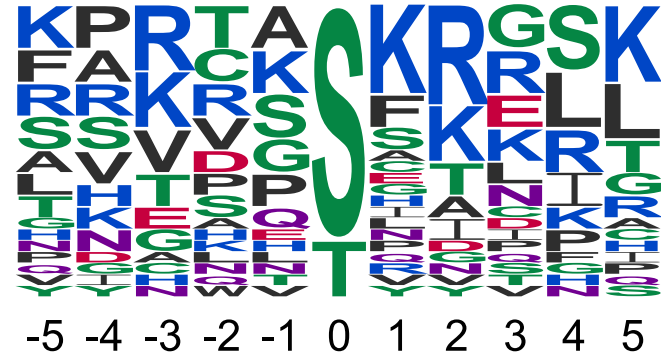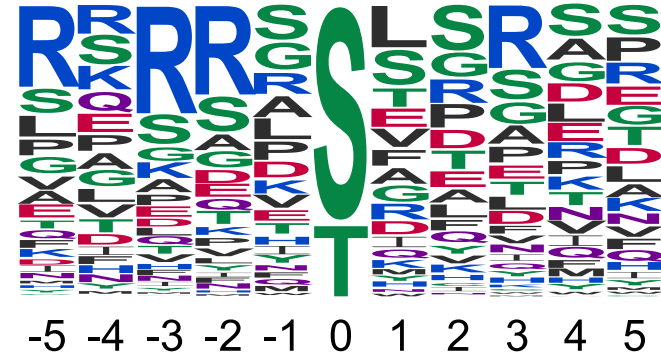

..RR.[ST]..... ( 25)  
 ..R..[ST]..... (146)  
 ...R.[ST]..... (117)  
 .....[ST]..R.. ( 80)  
 R....[ST]..... ( 86)

139      454/1231      26      0.62

PRKDC

Atypical\_PIKK

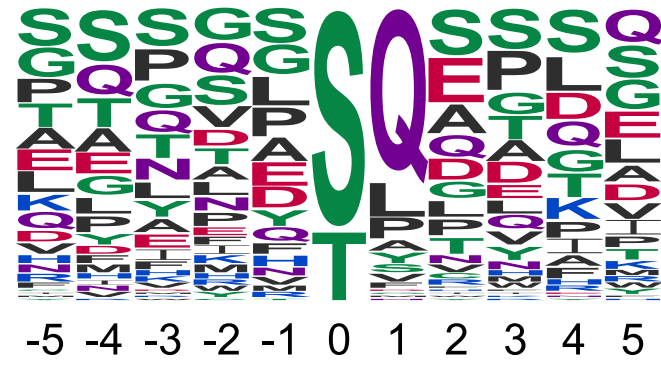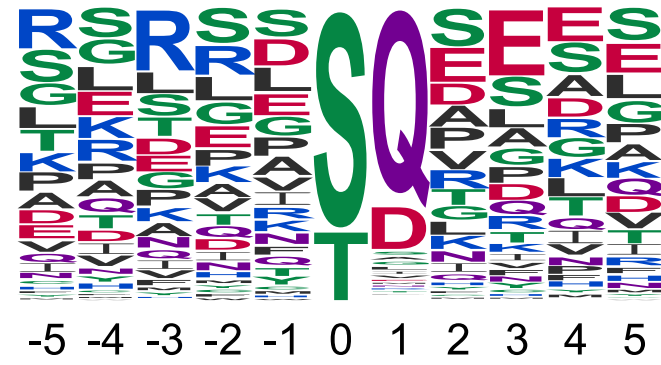

..D..[ST]D.E.. ( 11)  
 R.R..[ST]..... ( 48)  
 ..RR.[ST]..... ( 28)  
 .....[ST]D.E.. ( 49)  
 .....[ST]Q.... (277)

220      413/2533      95      0.62

RPS6KA2

AGC\_RSK

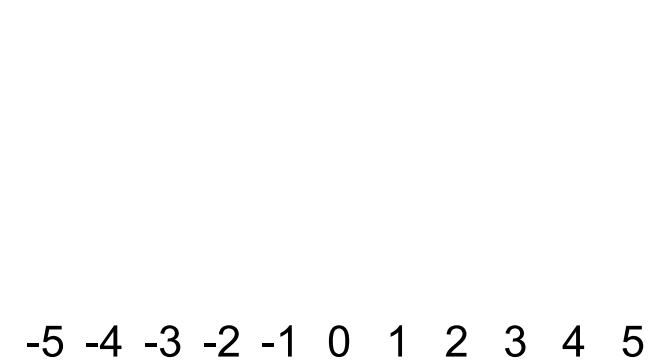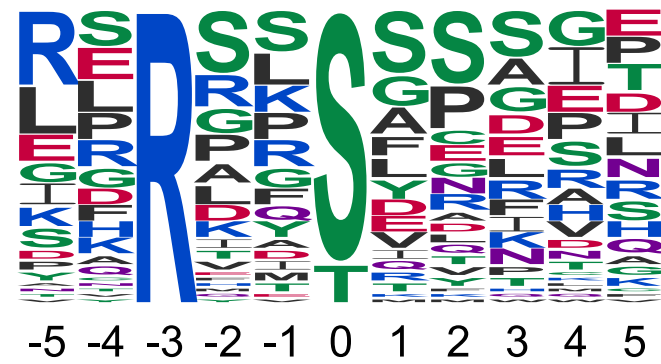

..R..[ST]..... (54)

36      54/384      3      0.62

SMG1

Atypical\_PIKK

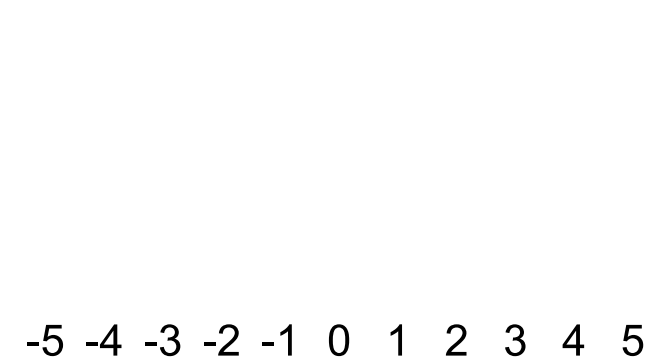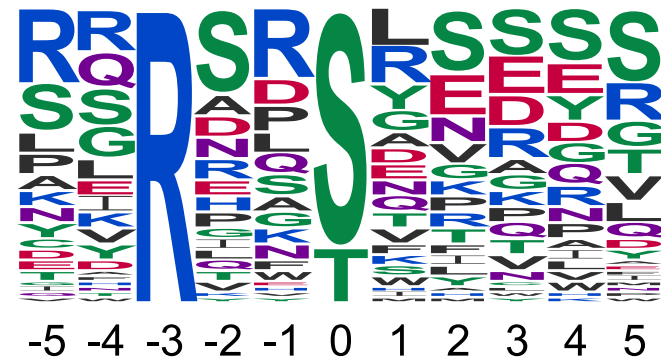

..R..[ST]..... (55)

42      55/469      5      0.62



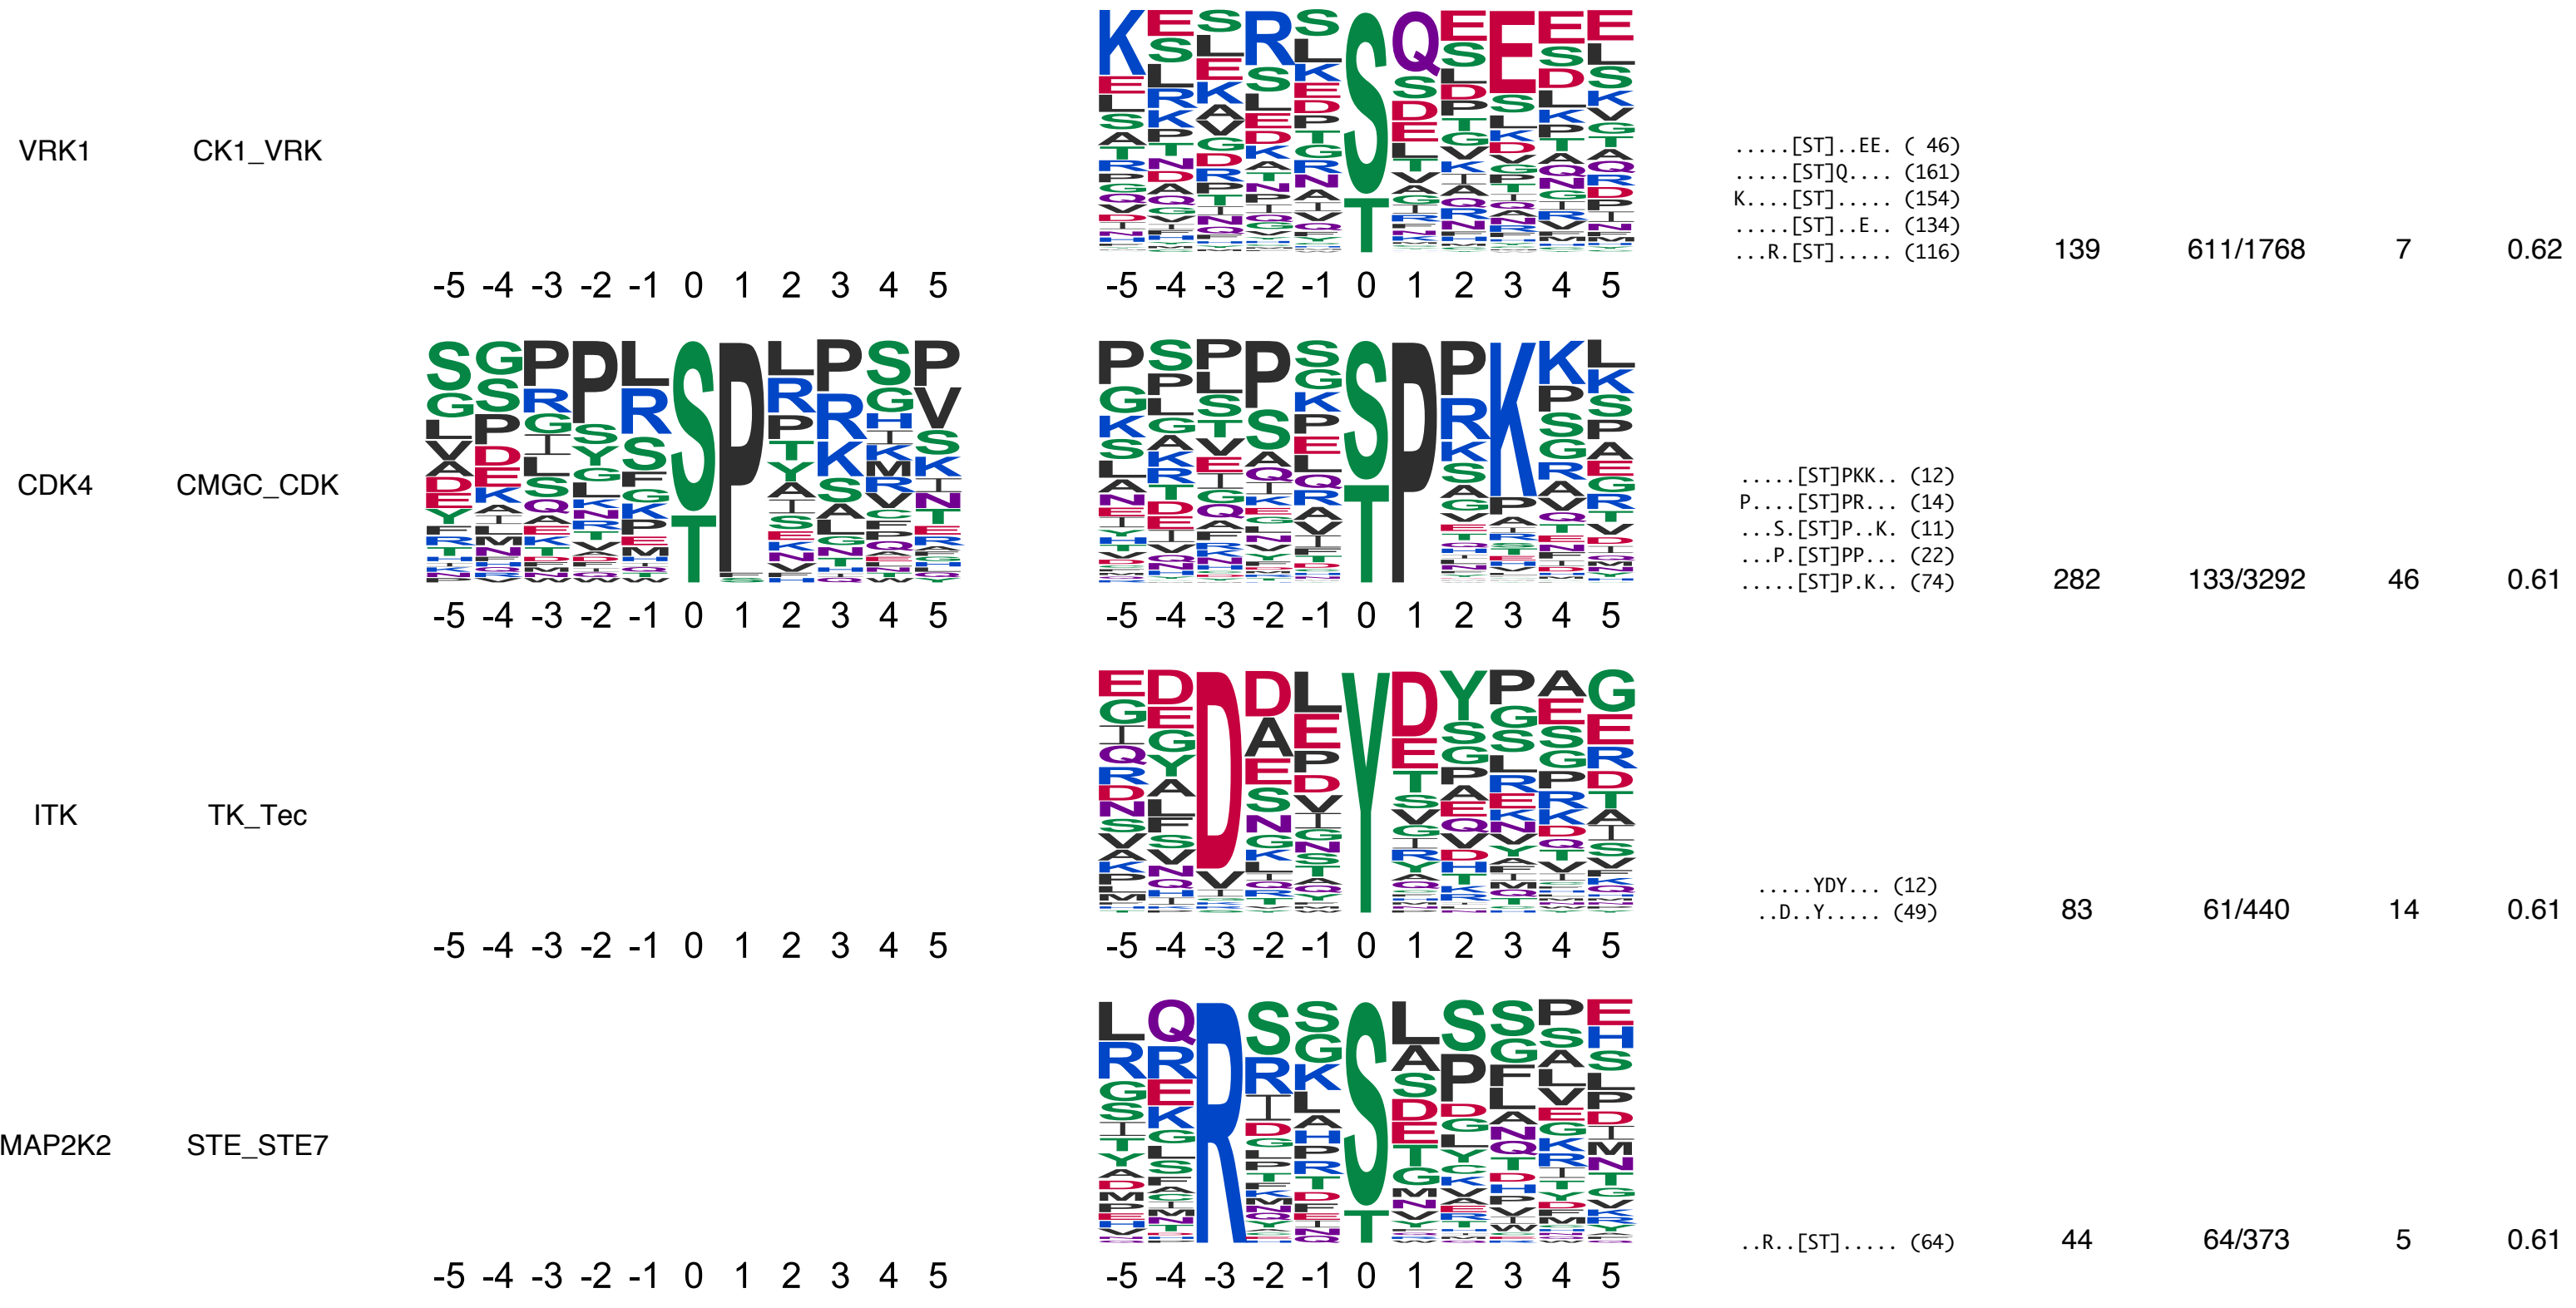

MAP4K1 STE\_STE20

-5 -4 -3 -2 -1 0 1 2 3 4 5

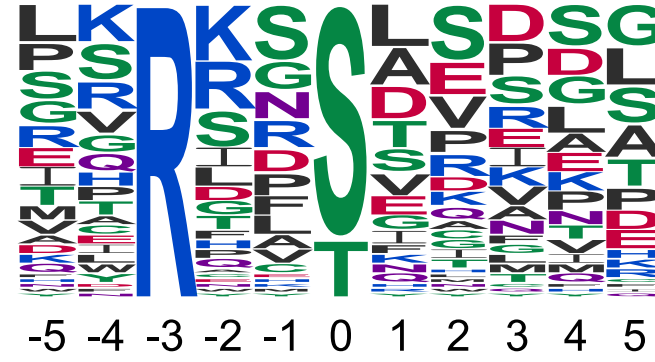

..R..[ST]..... (61)

37

61/400

10

0.61

MAPK14 CMGC\_MAPK

-5 -4 -3 -2 -1 0 1 2 3 4 5

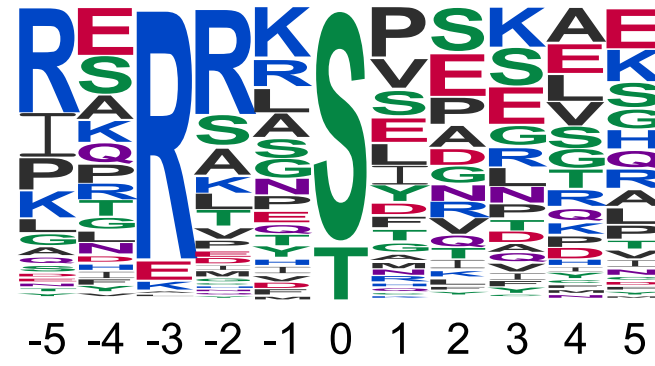

P....[ST]P.K.. (16)  
K...K[ST]P.... (10)  
..RR.[ST]..... (65)  
R.R..[ST]..... (58)  
I.R..[ST]..... (25)

355

179/3666

142

0.61

MAPK8 CMGC\_MAPK

-5 -4 -3 -2 -1 0 1 2 3 4 5

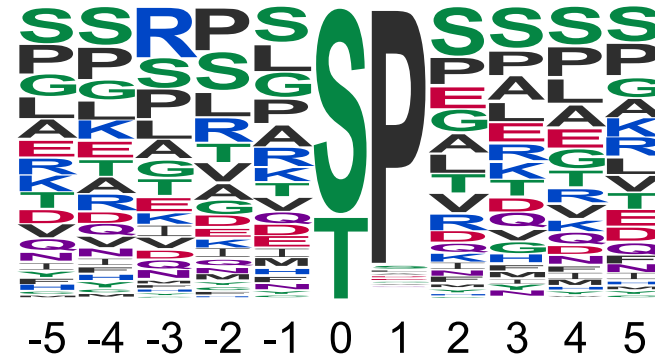

..RR.[ST]..... ( 53)  
...P.[ST]PP... ( 17)  
.....[ST]P...K ( 57)  
..R..[ST].S... ( 63)  
.....[ST]P.... (766)

274

956/3379

106

0.61

MET TK\_Met

-5 -4 -3 -2 -1 0 1 2 3 4 5

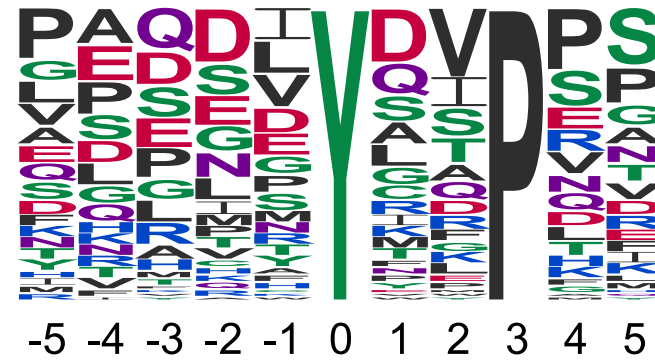

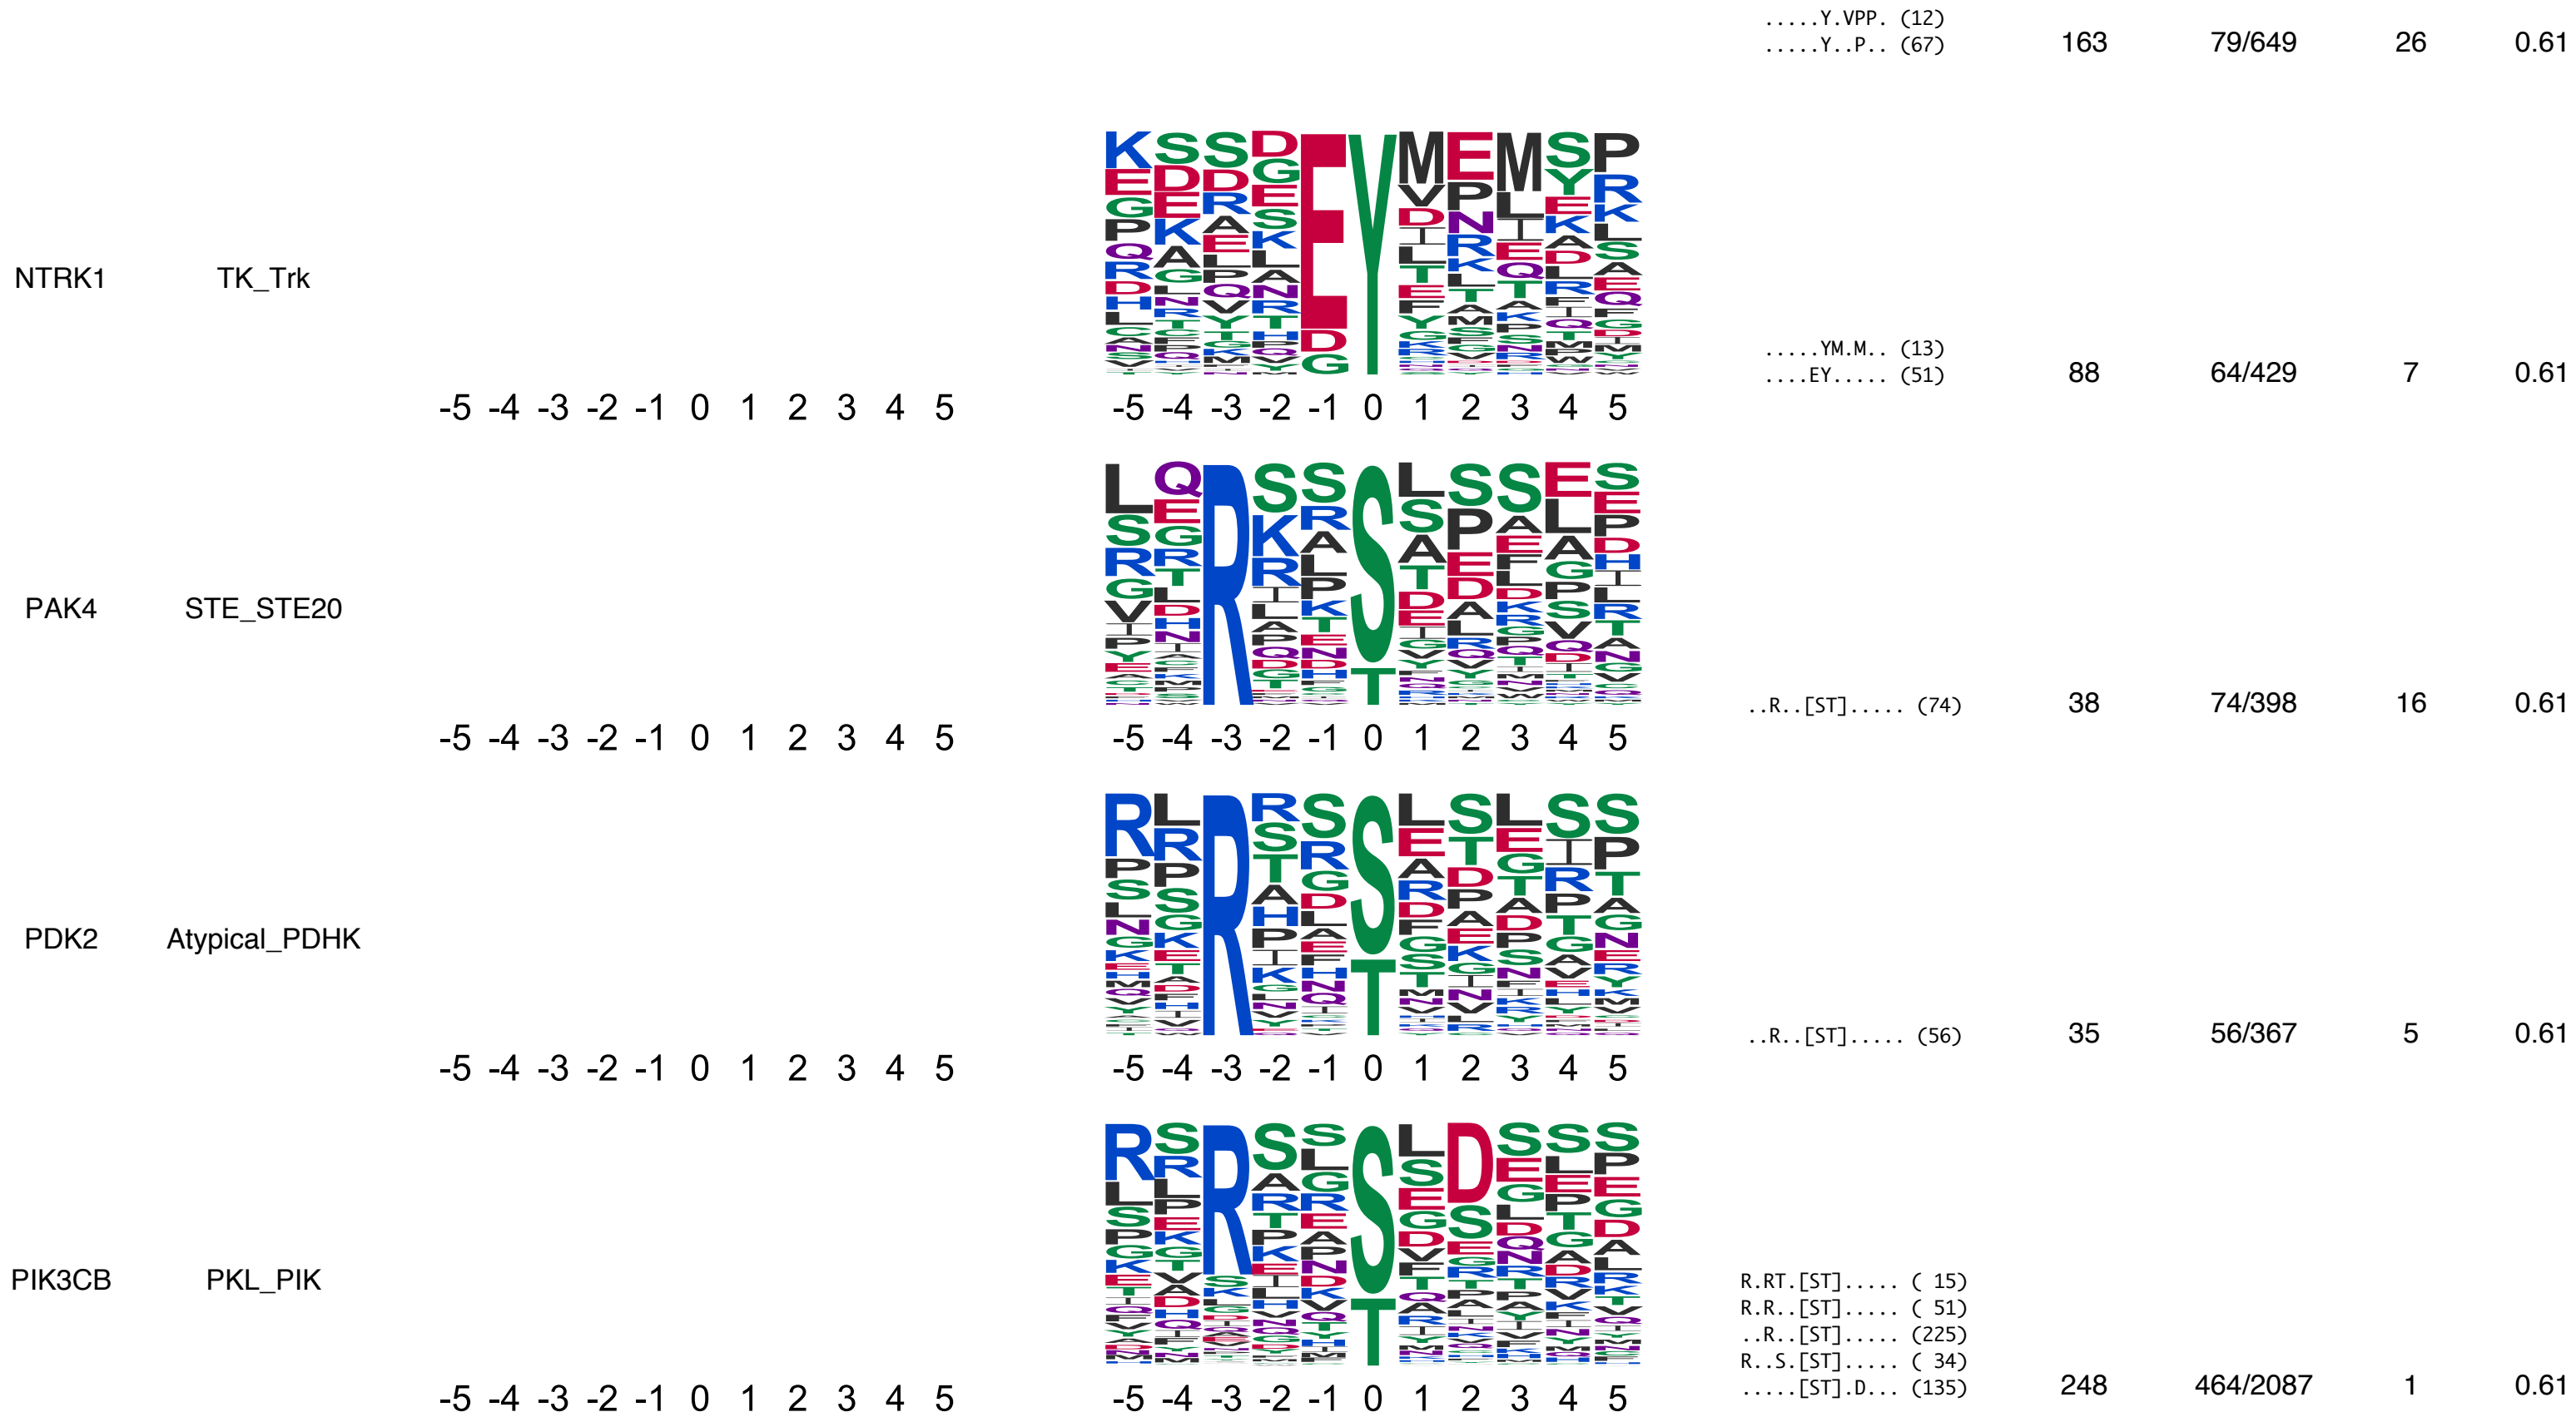

PRKCB

AGC\_PKC

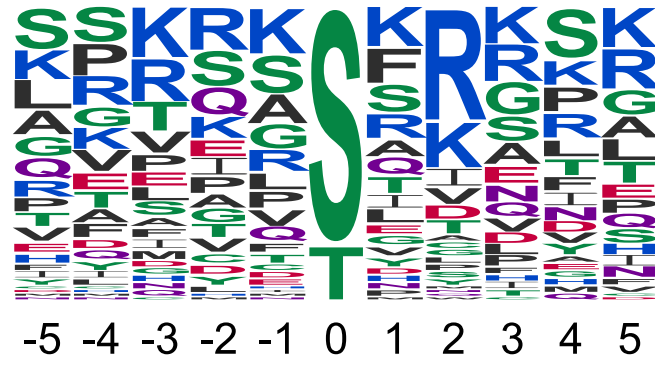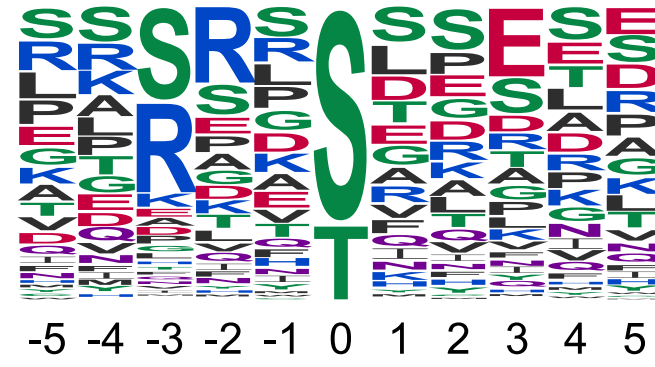

..RR.[ST]..... ( 38)  
 ..R..[ST]..... (183)  
 ...R.[ST]..... (148)  
 .....[ST]..E.. (128)  
 ..S..[ST]..... (213)

162      710/1813      80      0.61

RAF1

TKL\_RAF

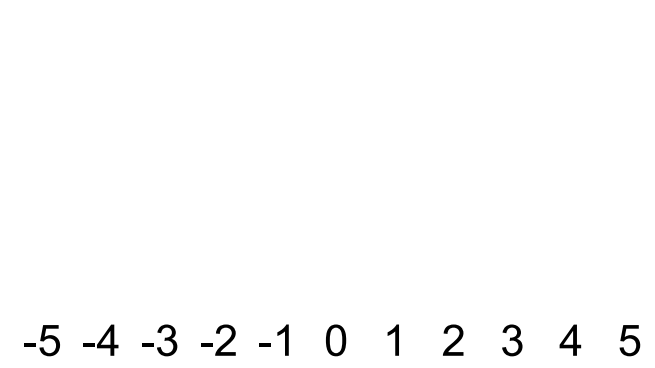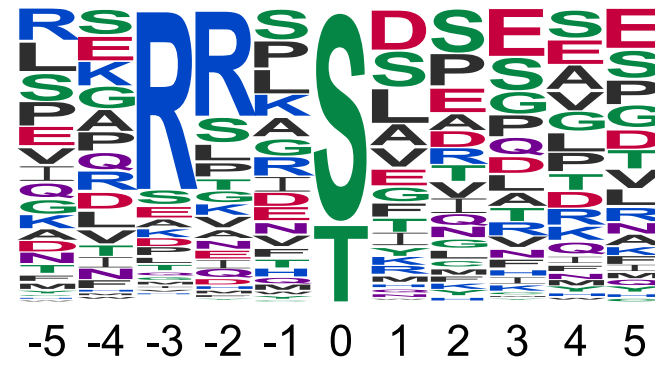

..R..[ST]..... (203)  
 .....[ST]D.E.. ( 26)  
 ...R.[ST]..... (100)

168      329/1540      13      0.61

STK3

STE\_STE20

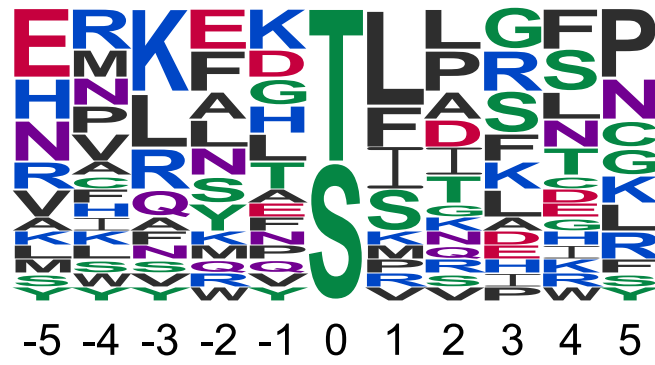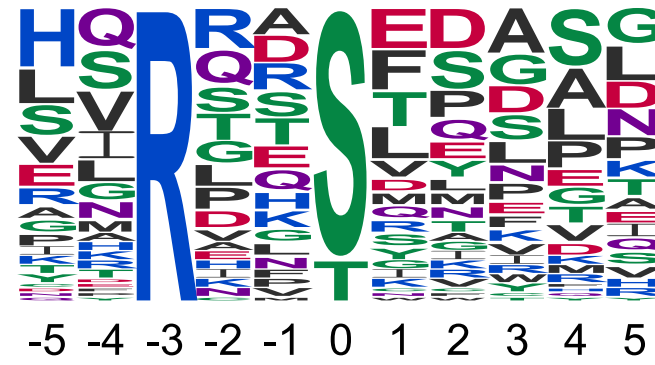

..R..[ST]..... (64)

50      64/401      21      0.61

WNK1

Other\_WNK

..R..[ST]..... (66)

40      66/414      6      0.61

ZAP70 TK\_Syk

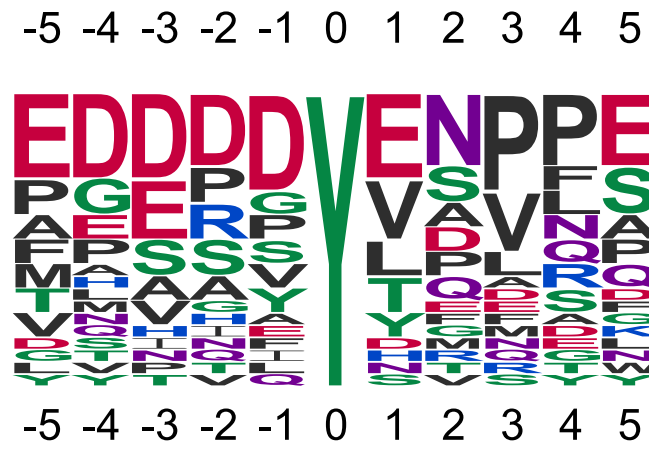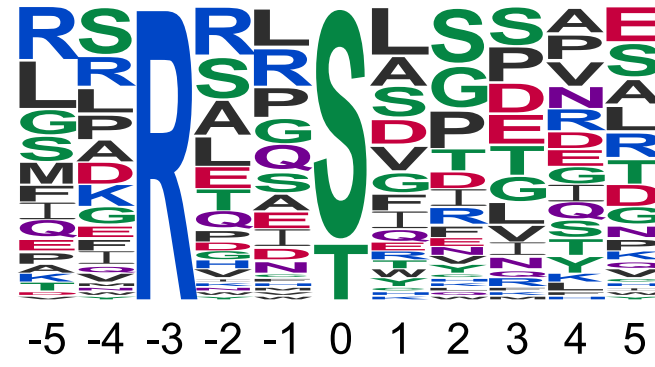

.....Y..P.. (63)

94

63/559

24

0.61

AKT2 AGC\_Akt

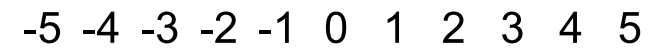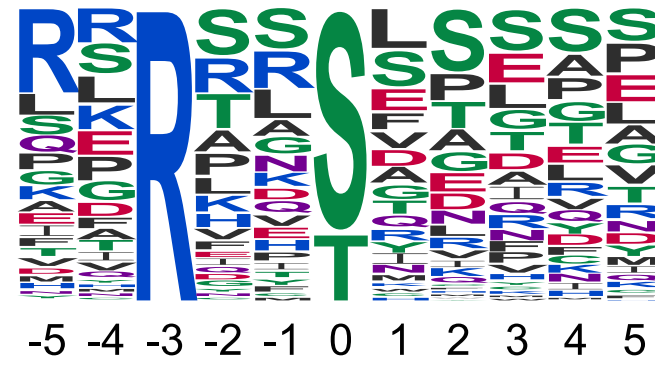

R..RT.[ST]..... ( 18)  
 RPR..[ST]..... ( 13)  
 ..RR.[ST]..... ( 29)  
 R.R..[ST]..... ( 46)  
 ..R..[ST]..... (158)

130

264/1514

19

0.60

GUCY2C RGC\_RGC

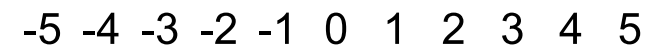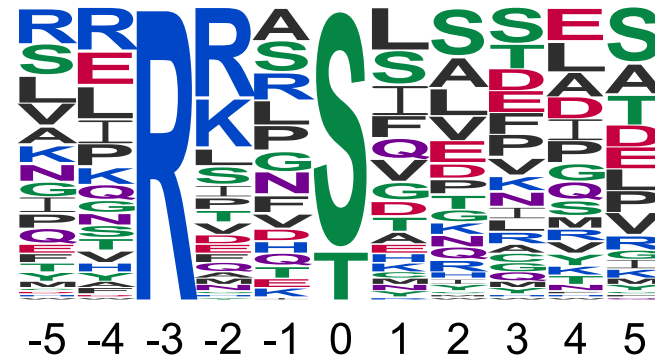

..RR.[ST]..... (29)  
 ..R..[ST]..... (65)

103

94/489

0

0.60

LRRK2

TKL\_LRRK

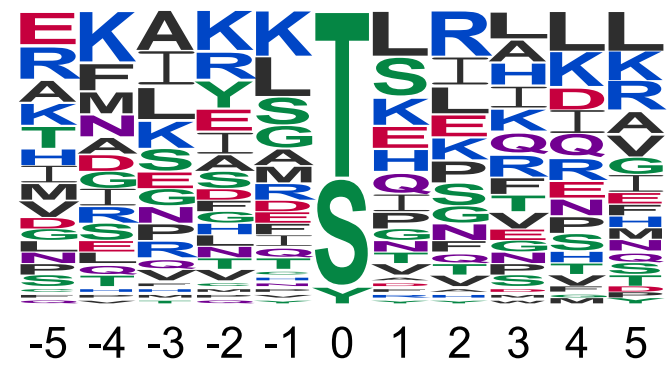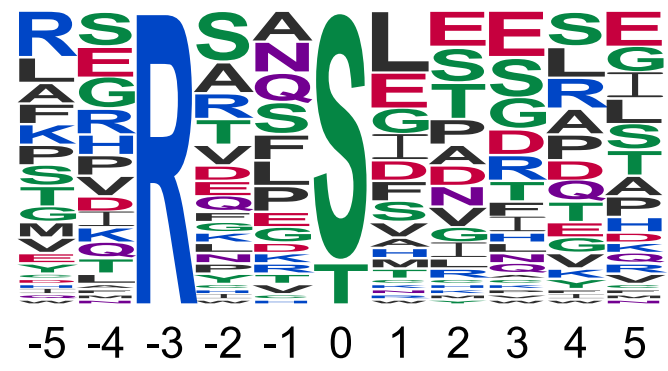

..R..[ST]..... (57)

46

57/466

51

0.60

MAP2K3

STE\_STE7

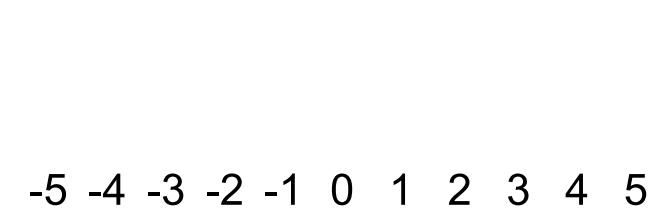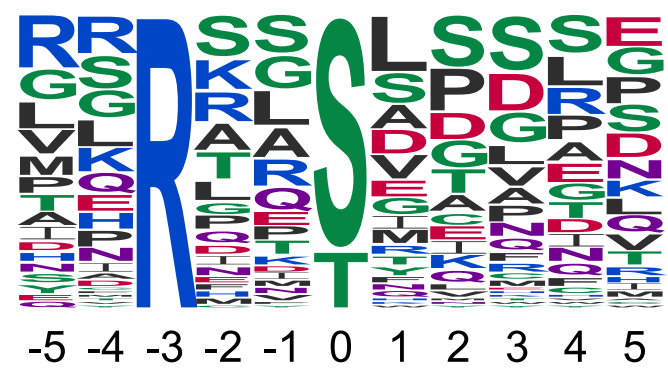

..R..[ST]..... (82)

59

82/471

6

0.60

PIM1

CAMK\_PIM

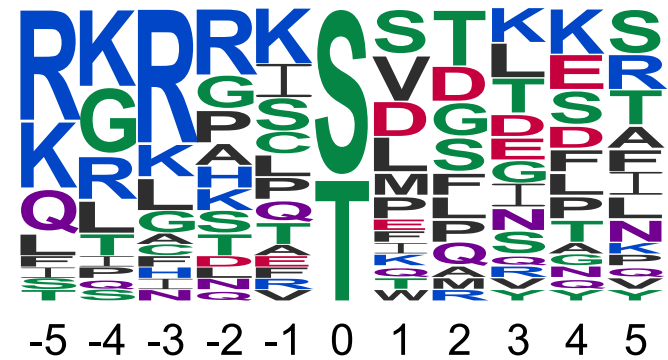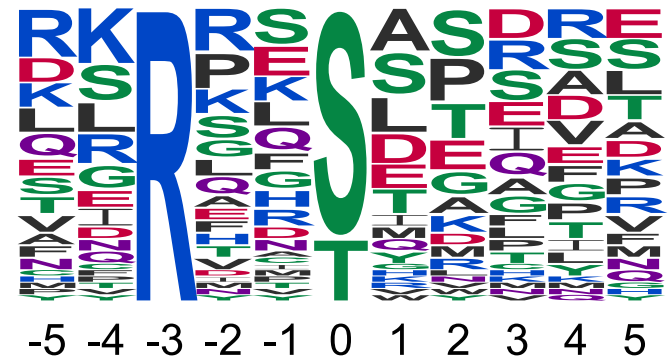

..R..[ST]..... (47)

49

47/383

26

0.60

PRKX

AGC\_PKA

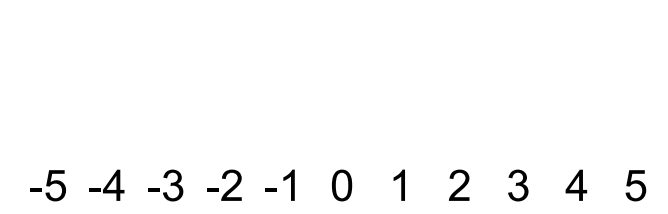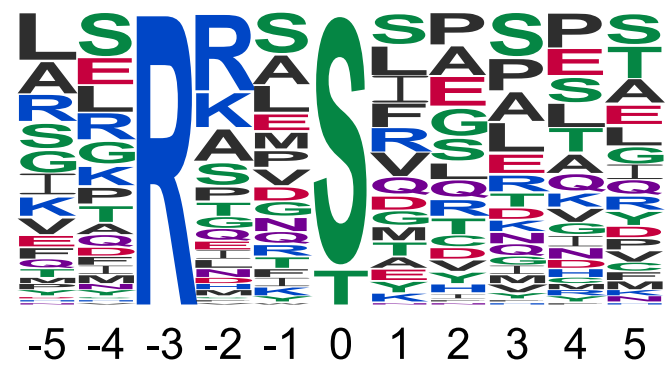

..RR.[ST]..... (26)  
..R..[ST]..... (70)

84

96/493

2

0.60

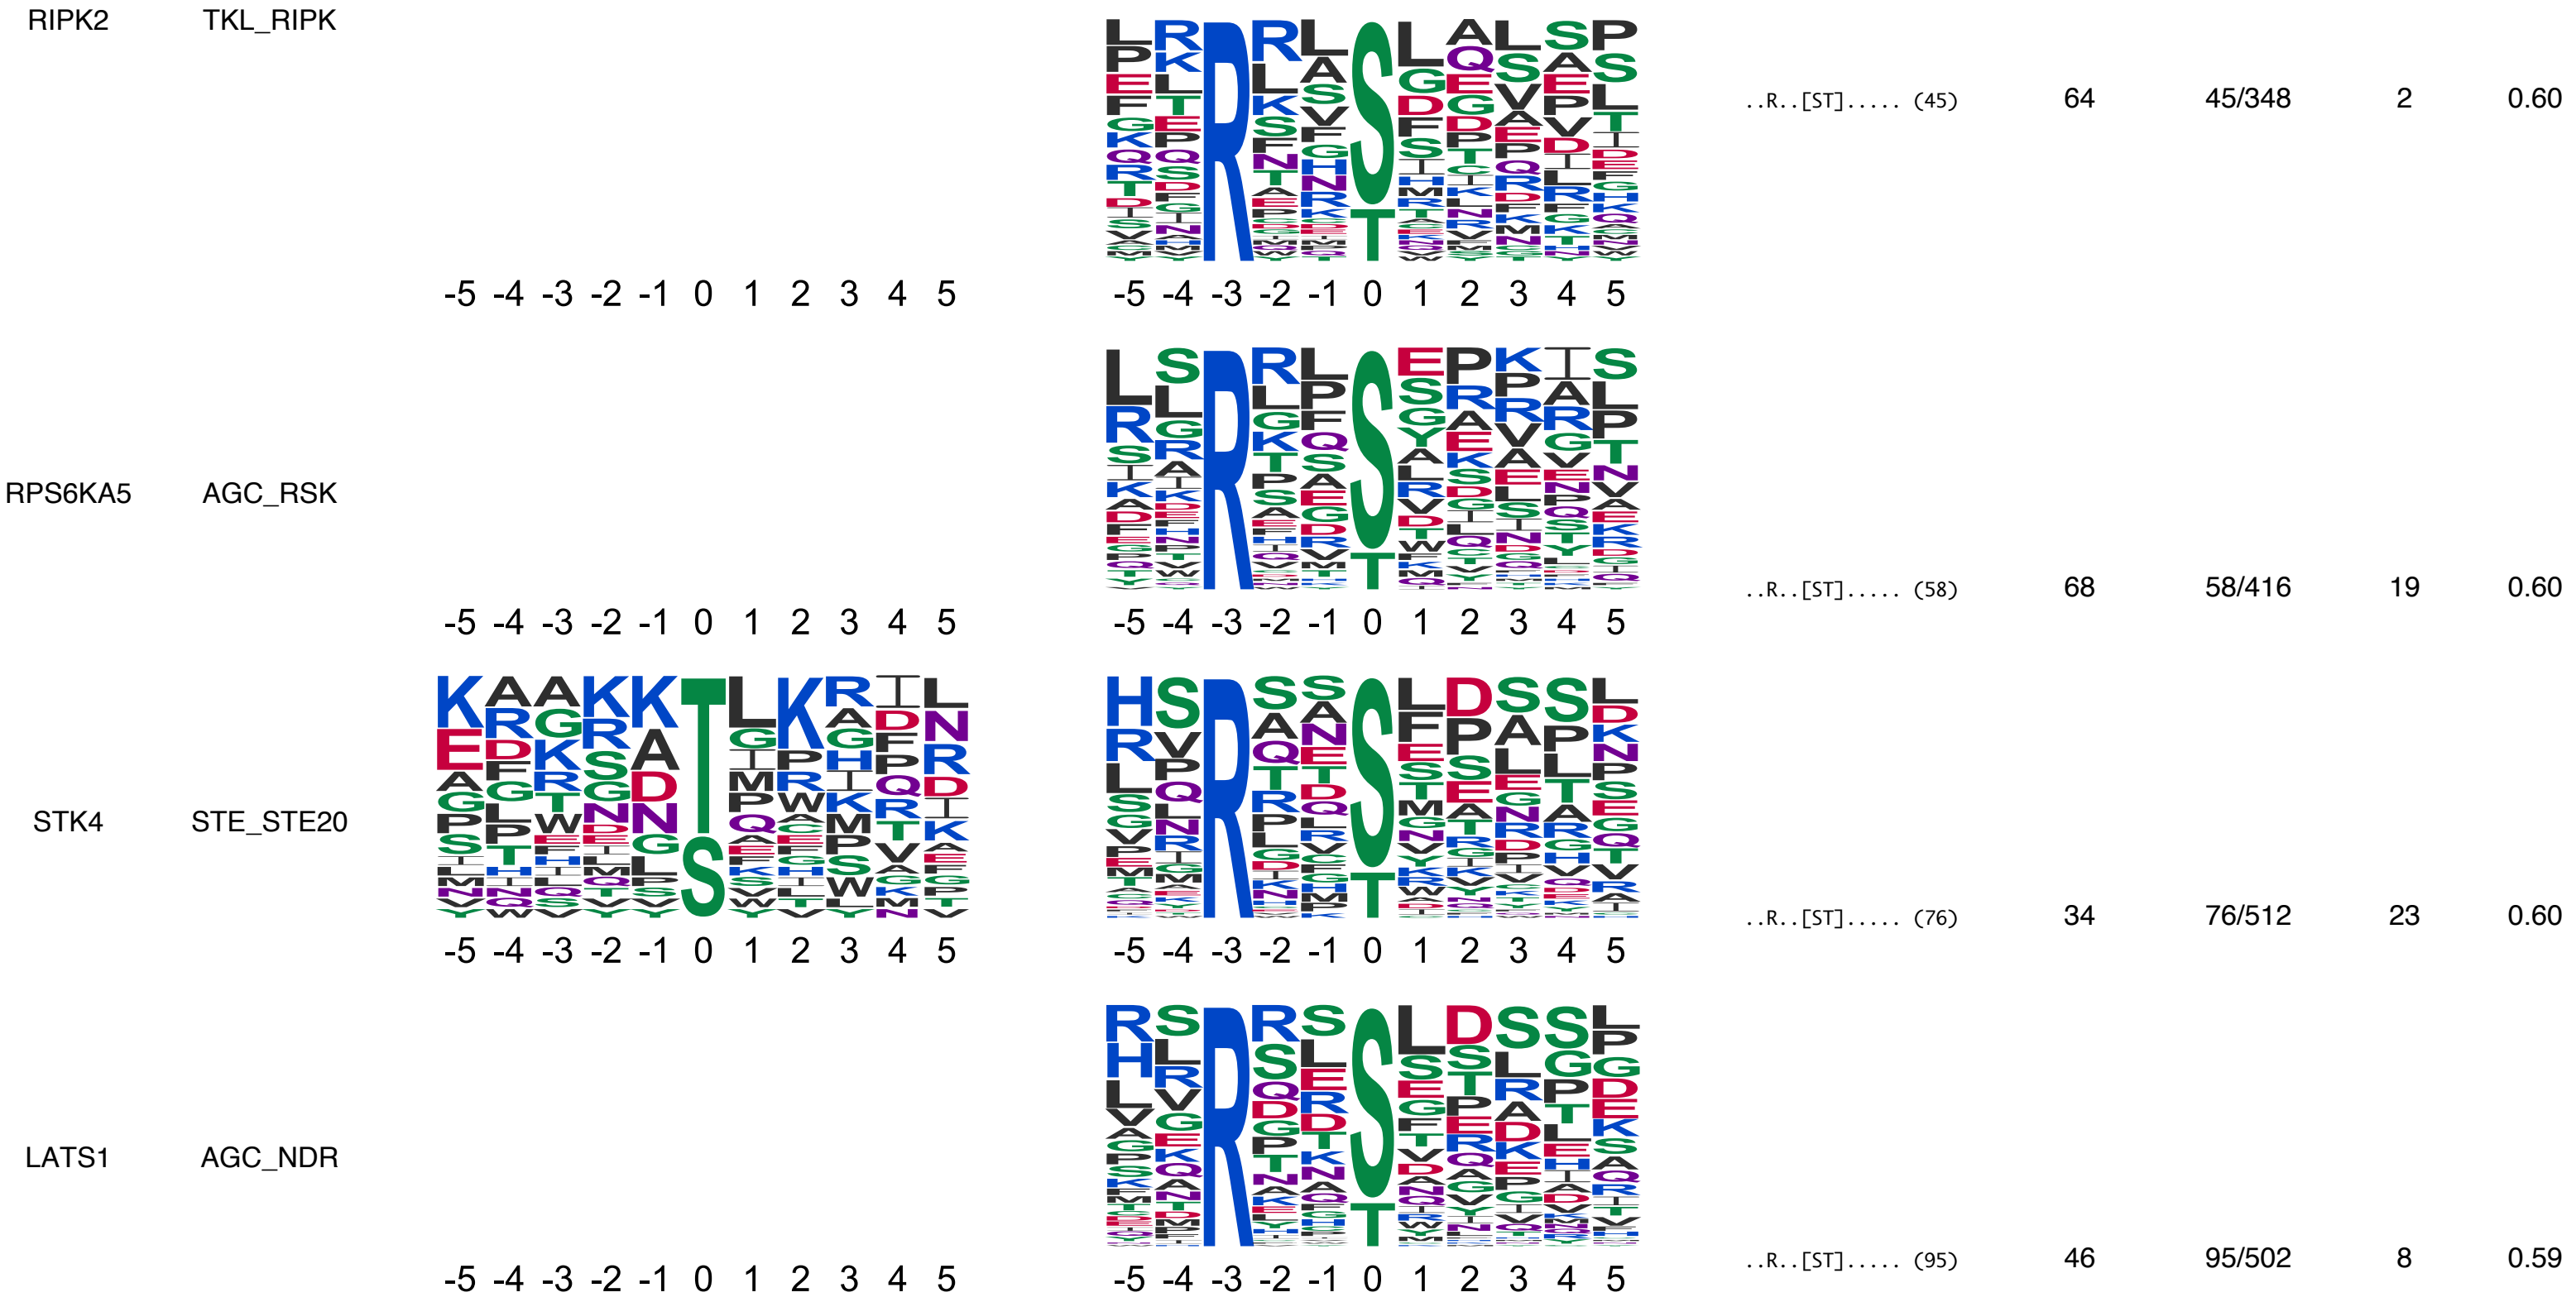

MAPKAPK2 CAMK\_MAPKAPK

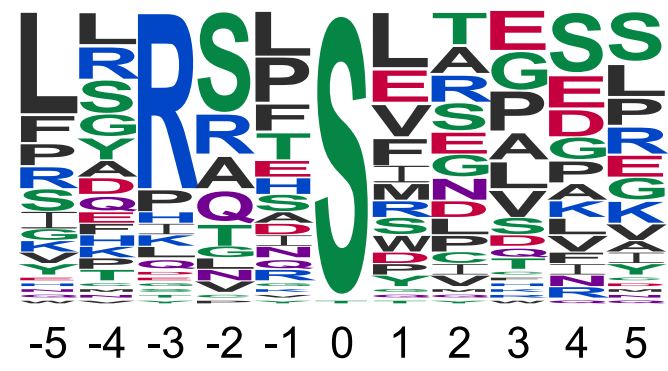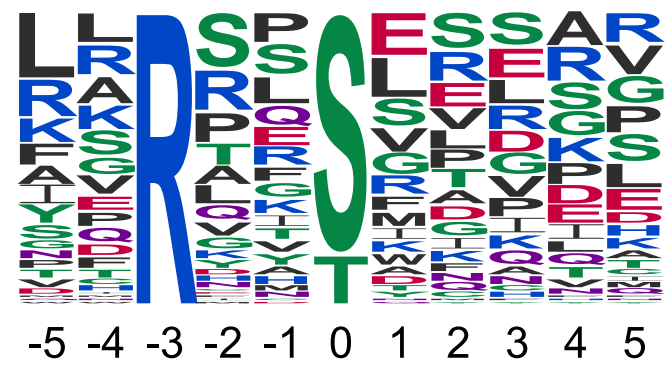

..R..[ST]..... (91)      57      91/542      51      0.59

NPR1      RGC\_RGC

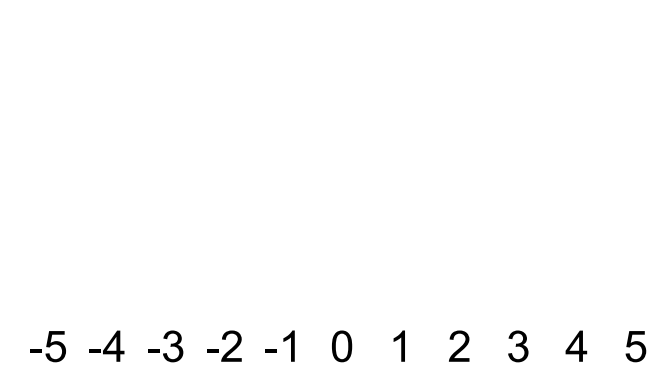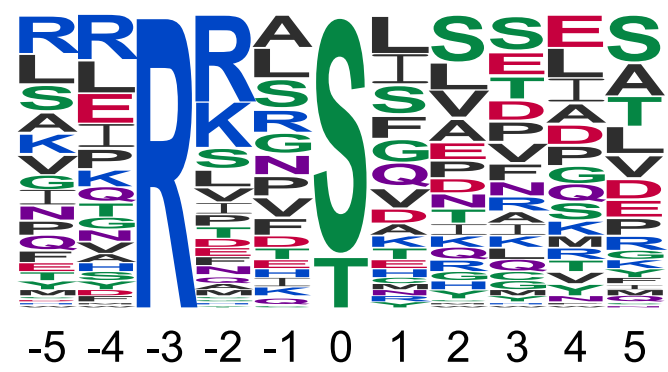

..RR.[ST]..... (29)  
 ..R..[ST]..... (68)      108      97/479      0      0.59

SLK      STE\_STE20

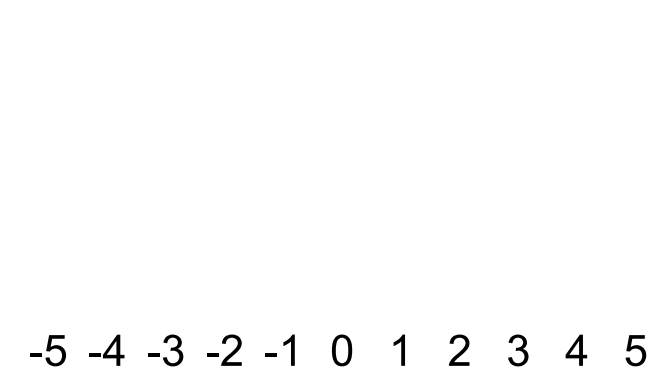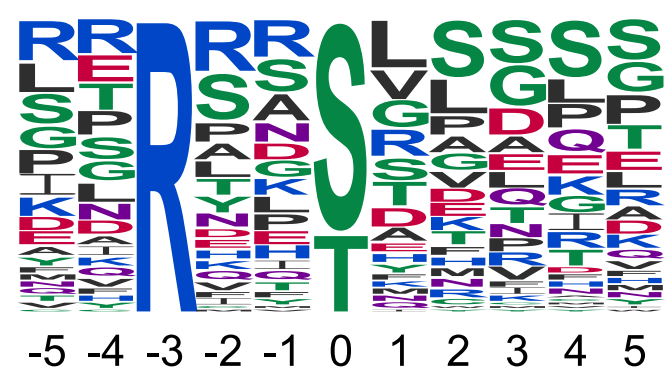

..RR.[ST]..... (15)  
 ..R..[ST]..... (68)      52      83/587      2      0.59

TBK1      Other\_IKK

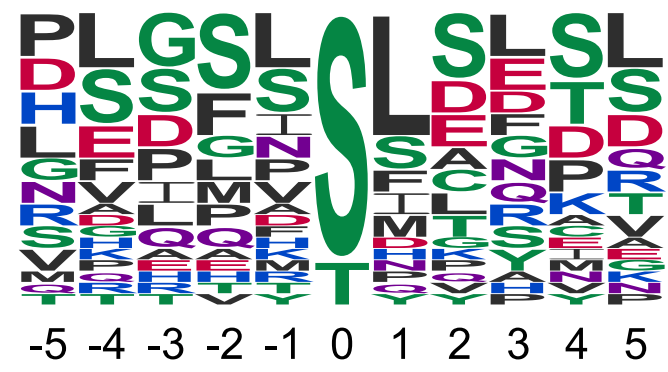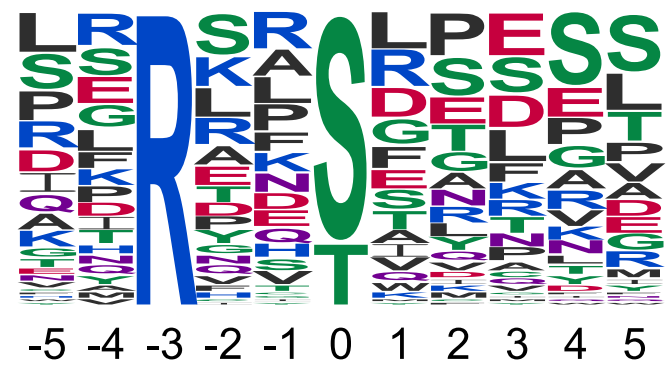

..R..[ST]..... (86)      93      86/700      26      0.59



TYK2

TK\_JAK

-5 -4 -3 -2 -1 0 1 2 3 4 5

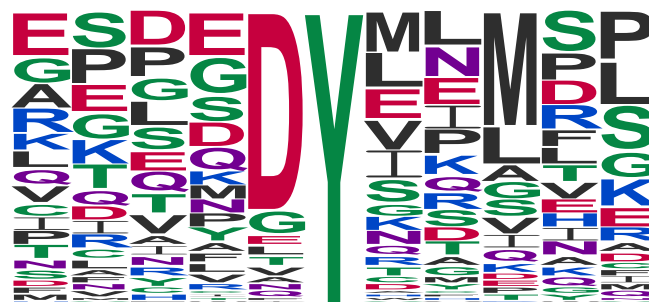

-5 -4 -3 -2 -1 0 1 2 3 4 5

....DY..... (57)  
.....Y..M.. (27)

130

84/485

9

0.59

ULK2

Other\_ULK

-5 -4 -3 -2 -1 0 1 2 3 4 5

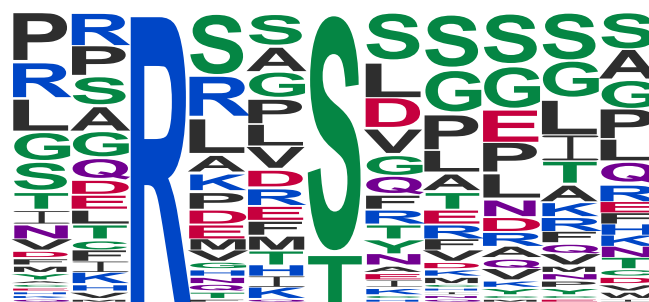

-5 -4 -3 -2 -1 0 1 2 3 4 5

..R..[ST]..... (79)

52

79/542

0

0.59

BLK

TK\_Src

-5 -4 -3 -2 -1 0 1 2 3 4 5

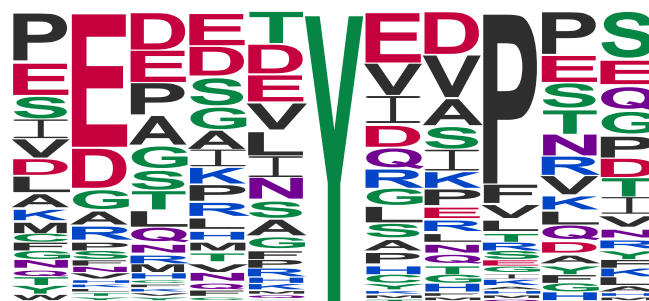

-5 -4 -3 -2 -1 0 1 2 3 4 5

.D...YE.P.. (13)  
.....Y.VPP. (11)  
.....Y..P.. (56)  
.E...Y..... (56)

81

136/485

4

0.58

BTK

TK\_Tec

-5 -4 -3 -2 -1 0 1 2 3 4 5

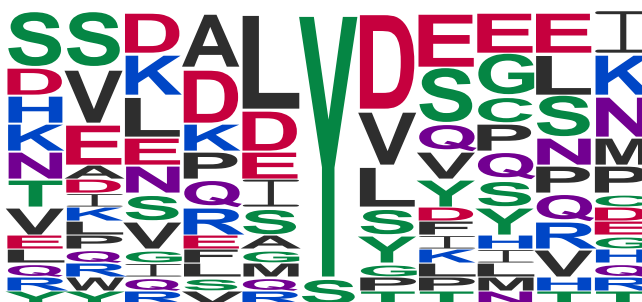

-5 -4 -3 -2 -1 0 1 2 3 4 5

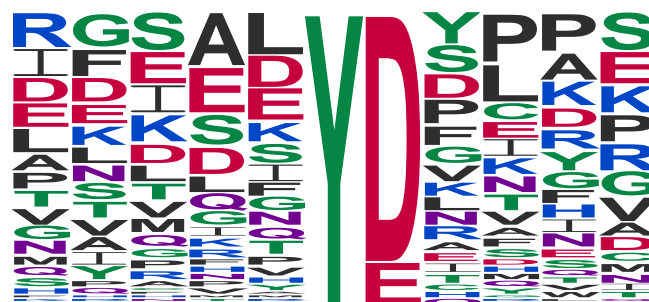

-5 -4 -3 -2 -1 0 1 2 3 4 5

.....YE.P.. (12)  
.....YD..... (69)

156

81/767

21

0.58

CAMK2G CAMK\_CAMK2

-5 -4 -3 -2 -1 0 1 2 3 4 5

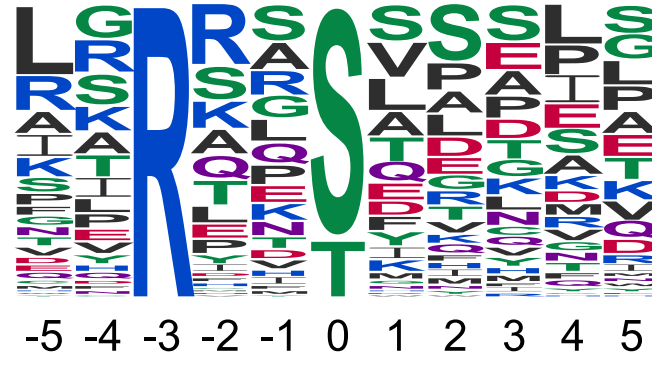

..RR.[ST]..... (24)  
..R..[ST]..... (91)

96

115/788

16

0.58

ERN1 Other\_IRE

-5 -4 -3 -2 -1 0 1 2 3 4 5

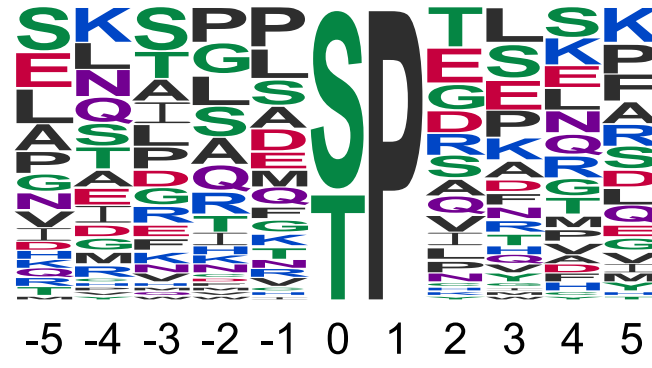

.....[ST]P.... (65)

55

65/422

0

0.58

IGF1R TK\_InsR

-5 -4 -3 -2 -1 0 1 2 3 4 5

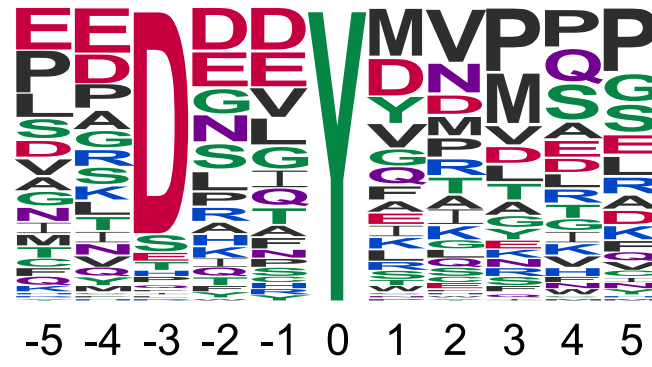

.....Y.VPP. (11)  
.....YM.M.. (14)  
..D..Y..... (71)

187

96/788

14

0.58

LATS2 AGC\_NDR

-5 -4 -3 -2 -1 0 1 2 3 4 5

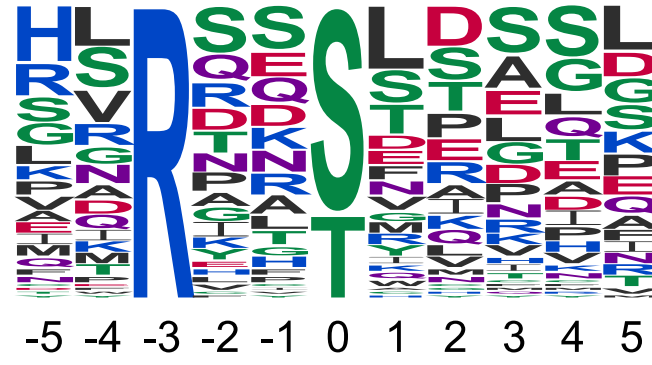

..R..[ST]..... (77)

43

77/549

4

0.58

MARK4 CAMK\_CAMKL

-5 -4 -3 -2 -1 0 1 2 3 4 5

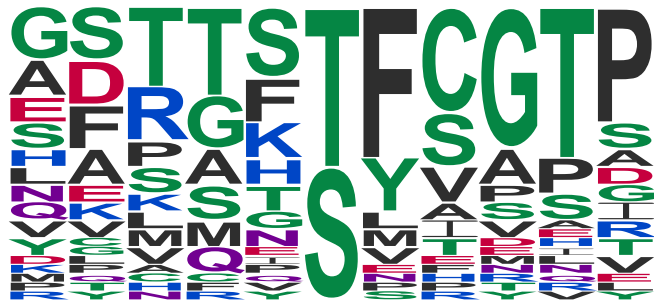

-5 -4 -3 -2 -1 0 1 2 3 4 5

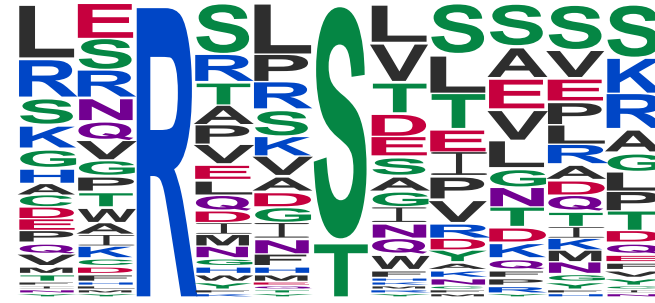

-5 -4 -3 -2 -1 0 1 2 3 4 5

..R..[ST]..... (75)

47

75/671

2

0.58

PDPK1 AGC\_PDK1

-5 -4 -3 -2 -1 0 1 2 3 4 5

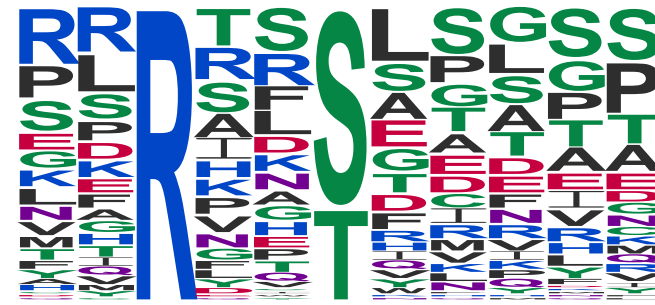

-5 -4 -3 -2 -1 0 1 2 3 4 5

..R..[ST]..... (96)

56

96/744

33

0.58

PRKACB AGC\_PKA

-5 -4 -3 -2 -1 0 1 2 3 4 5

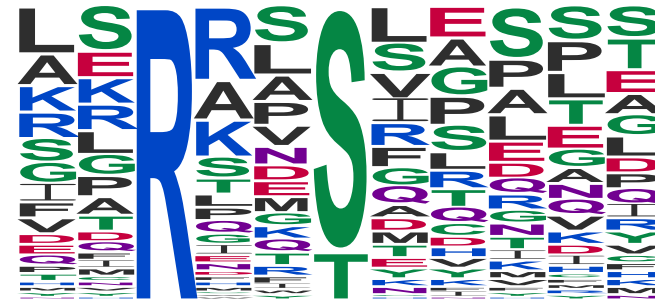

-5 -4 -3 -2 -1 0 1 2 3 4 5

..RR.[ST]..... (28)

..R..[ST]..... (83)

95

111/591

1

0.58

PRKCA AGC\_PKC

.ARR.[ST]..... ( 10)

R.R..[ST]..S.. ( 15)

..RR.[ST]..... ( 50)

..R..[ST]..... (324)

...R.[ST]..... (245)

324

644/2928

469

0.58

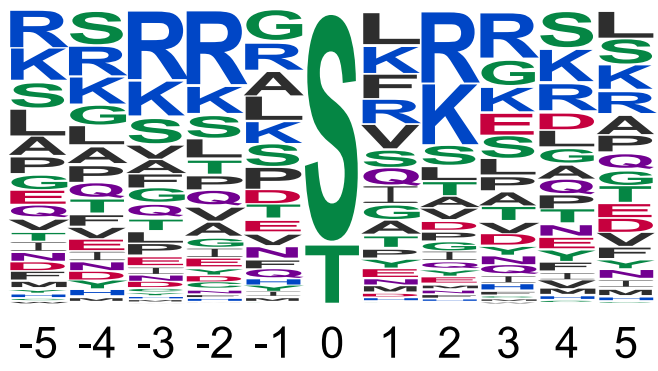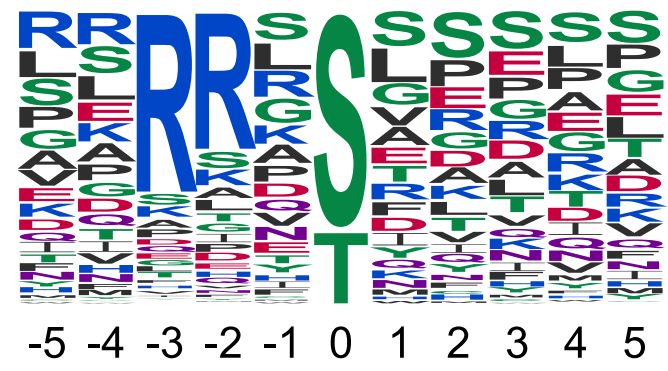

...R.[ST]..... (74)      50      74/776      2      0.57

-5 -4 -3 -2 -1 0 1 2 3 4 5

-5 -4 -3 -2 -1 0 1 2 3 4 5

CIT      AGC\_DMPK

ERBB4      TK\_EGFR

-5 -4 -3 -2 -1 0 1 2 3 4 5

-5 -4 -3 -2 -1 0 1 2 3 4 5

.....Y..P.. (55)  
 ..D..Y..... (43)      115      98/425      1      0.57

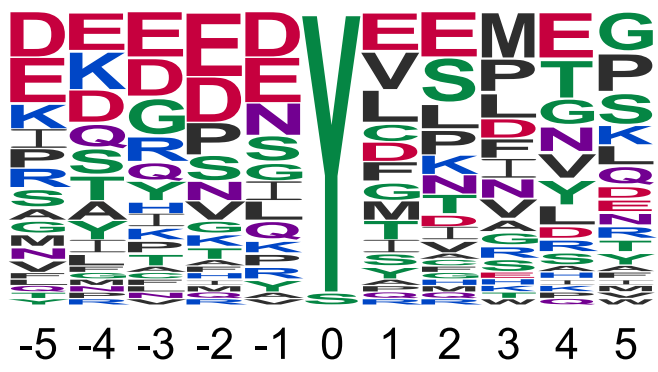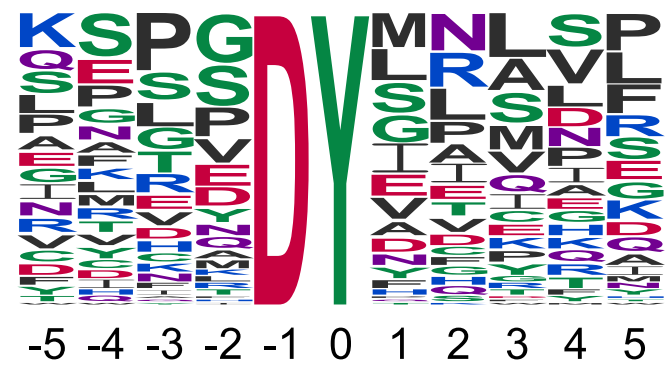

....DY..... (89)      246      89/966      45      0.57

INSR      TK\_InsR

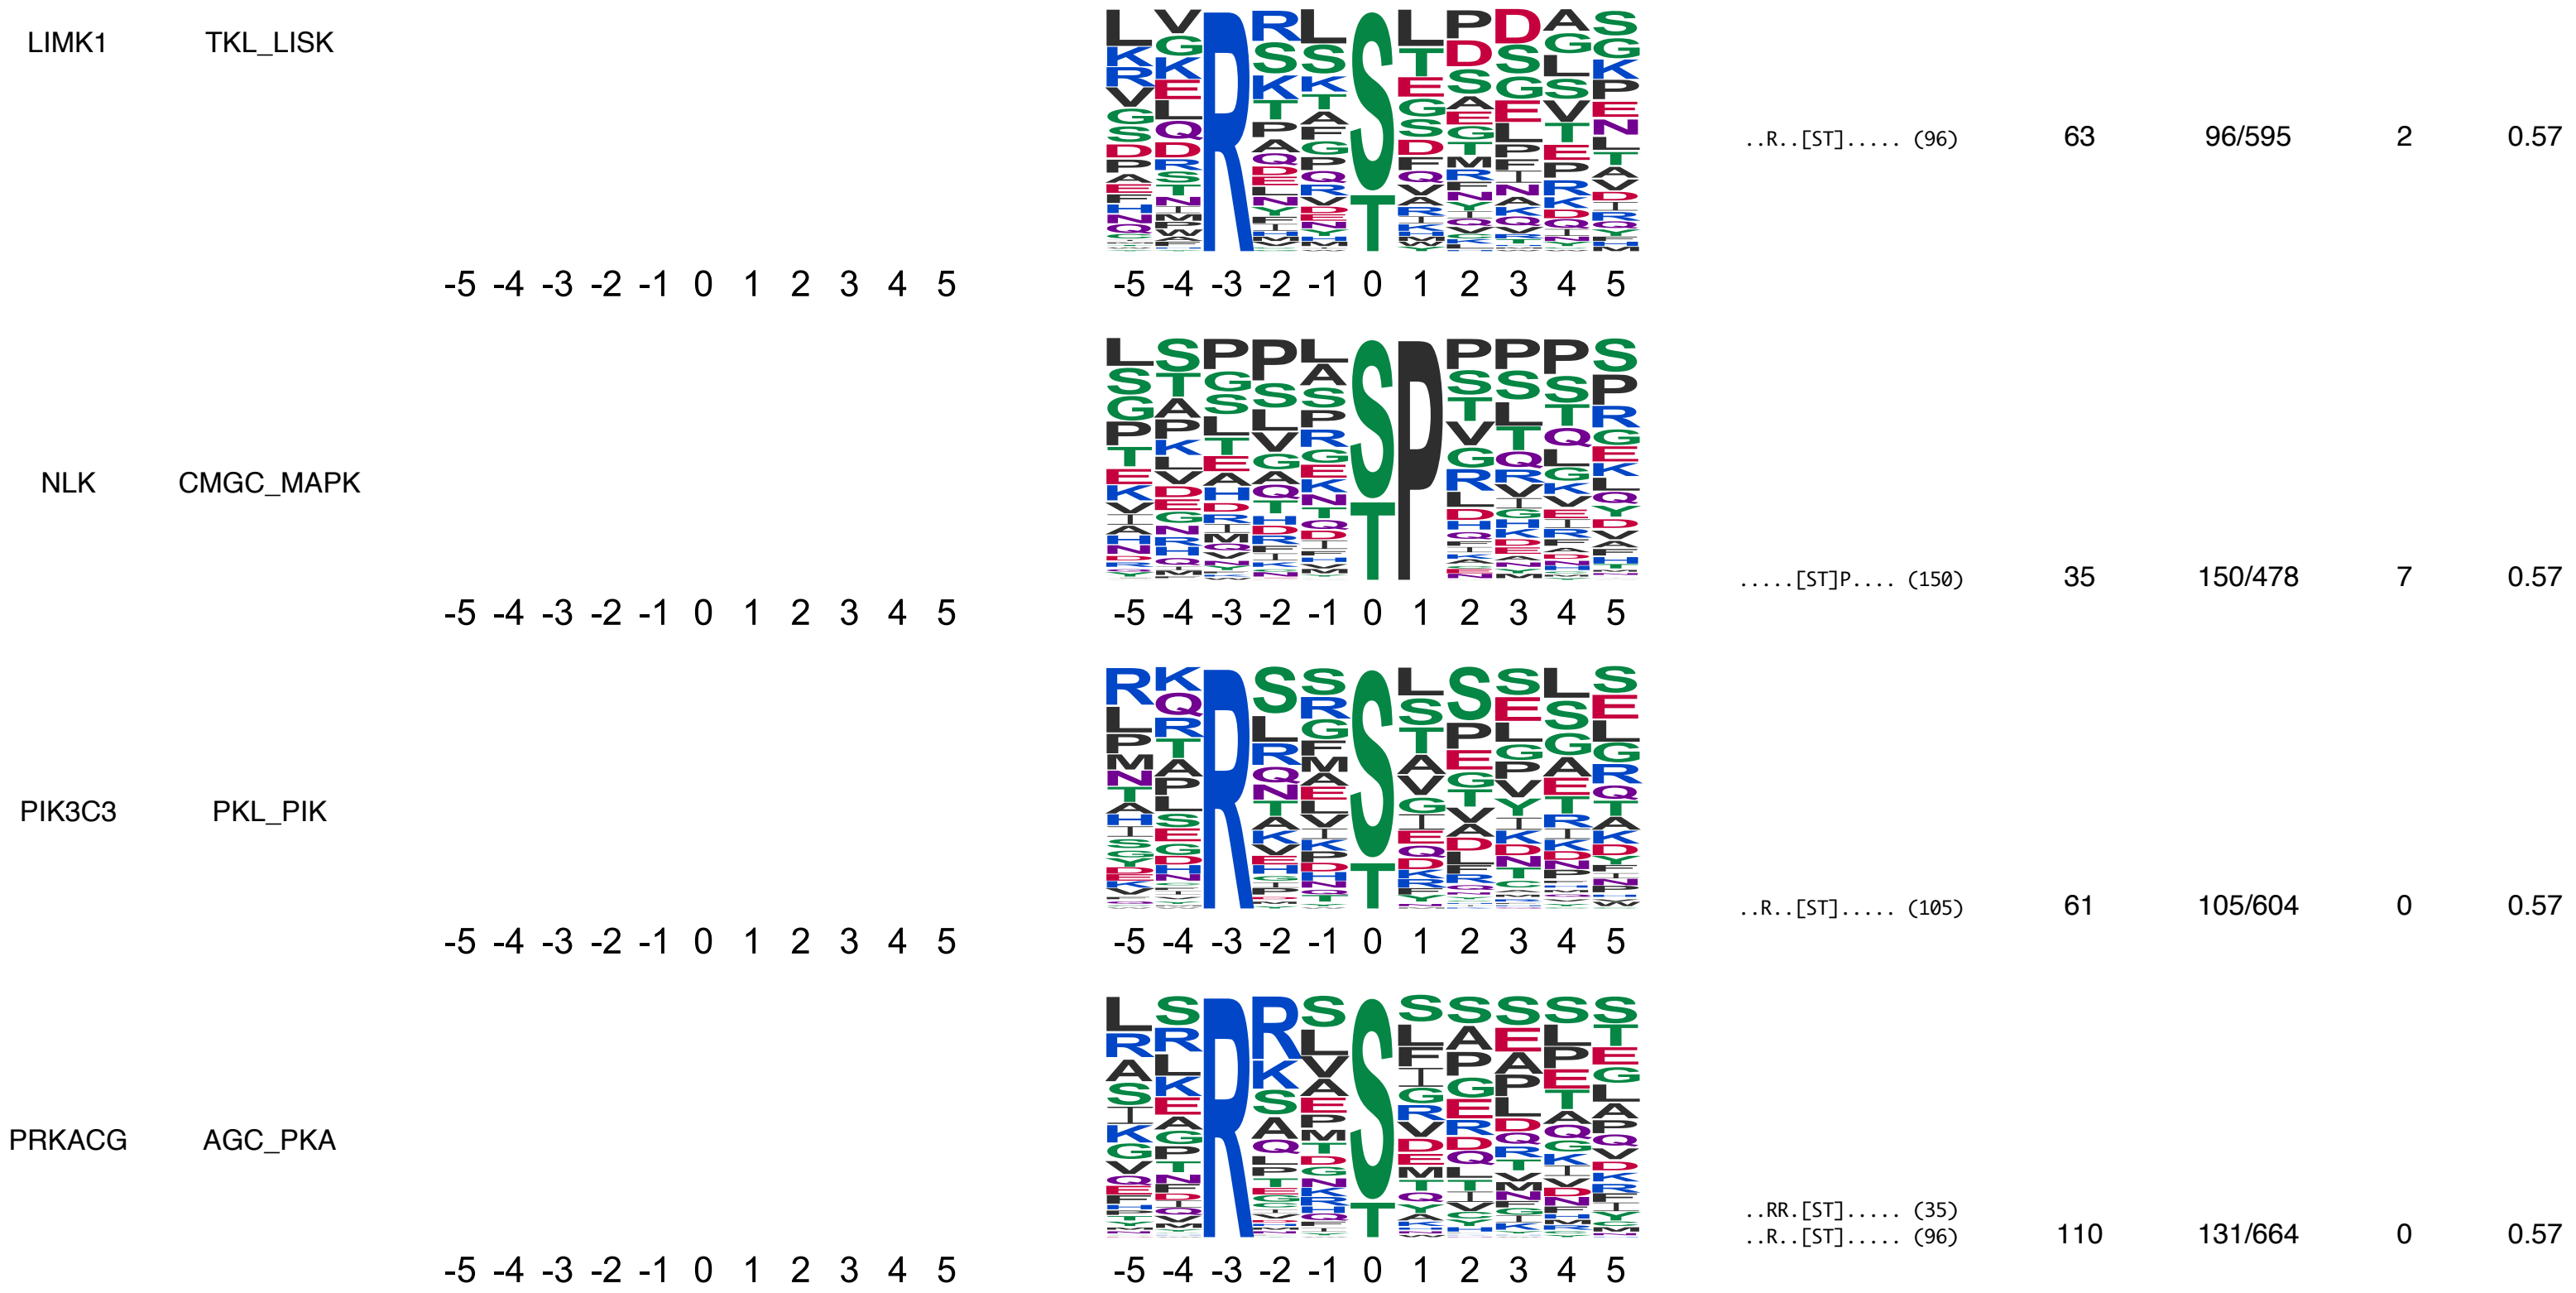

AURKC

Other\_Aur

-5 -4 -3 -2 -1 0 1 2 3 4 5

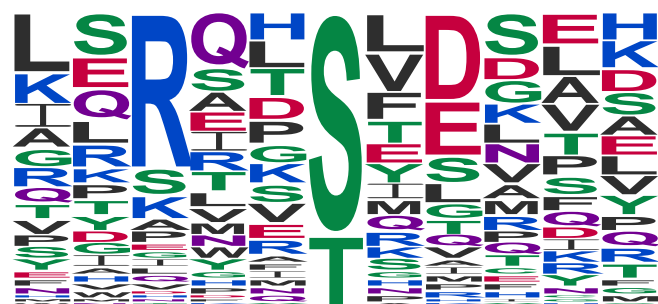

-5 -4 -3 -2 -1 0 1 2 3 4 5

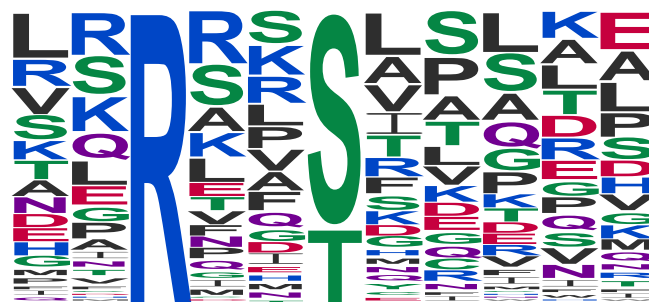

-5 -4 -3 -2 -1 0 1 2 3 4 5

..RR.[ST]..... (19)  
..R..[ST]..... (85)

58

104/922

2

0.56

CAMK2A

CAMK\_CAMK2

-5 -4 -3 -2 -1 0 1 2 3 4 5



-5 -4 -3 -2 -1 0 1 2 3 4 5

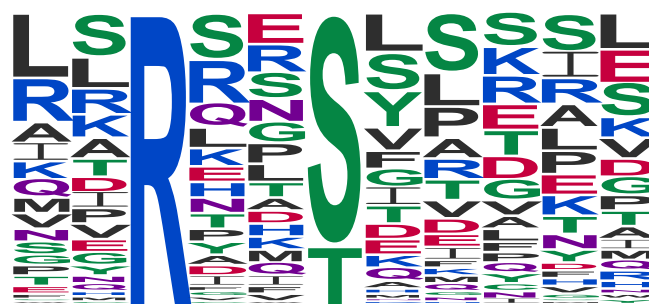

..R..[ST]..... (113)

91

113/805

74

0.56

CSK

TK\_Csk

-5 -4 -3 -2 -1 0 1 2 3 4 5

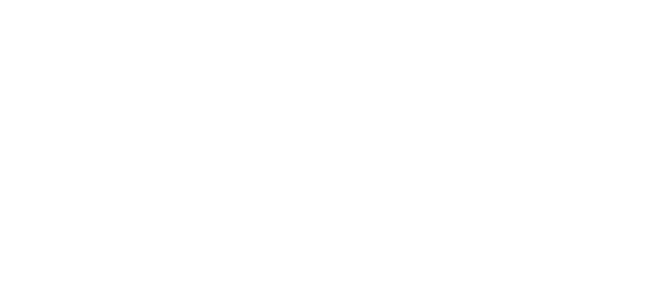

-5 -4 -3 -2 -1 0 1 2 3 4 5

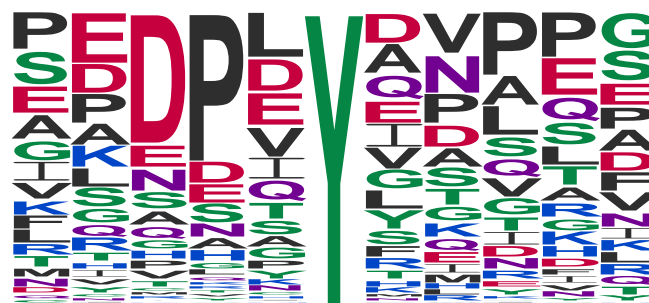

.....Y.VPP. (11)  
...P.Y..... (75)  
..D..Y..... (61)

133

147/706

15

0.56

EPHA2

TK\_Eph

-5 -4 -3 -2 -1 0 1 2 3 4 5

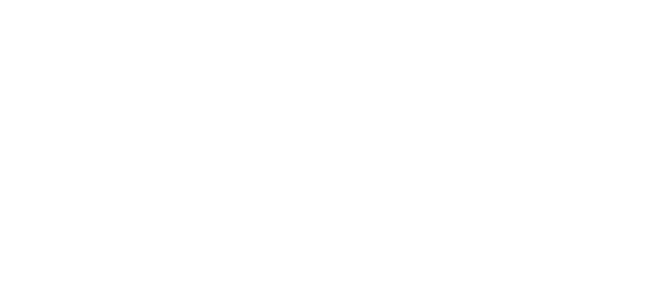

-5 -4 -3 -2 -1 0 1 2 3 4 5

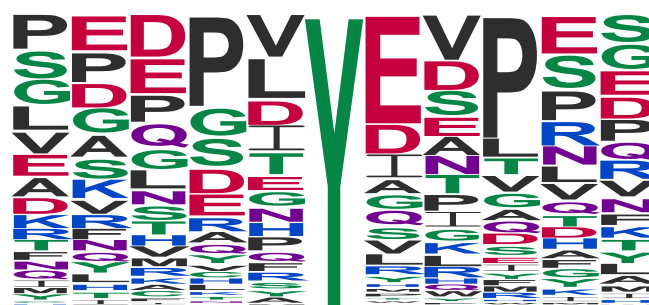

.....Y.VPP. (11)  
.....Y..P.. (67)  
.....YE..... (60)  
...P.Y..... (47)

85

185/537

15

0.56

JAK3 TK\_JAK

-5 -4 -3 -2 -1 0 1 2 3 4 5

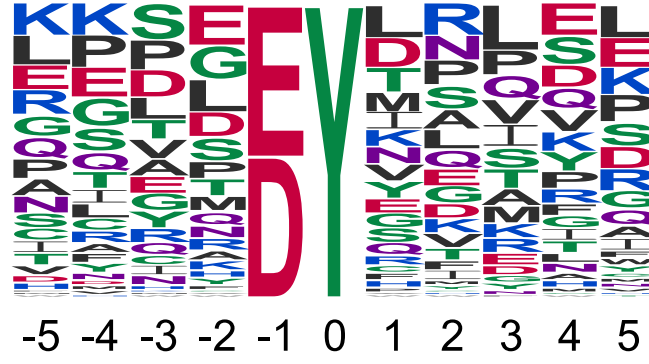

....DY..... (57)  
....EY..... (62)

133

119/590

13

0.56

MAP2K1 STE\_STE7

-5 -4 -3 -2 -1 0 1 2 3 4 5

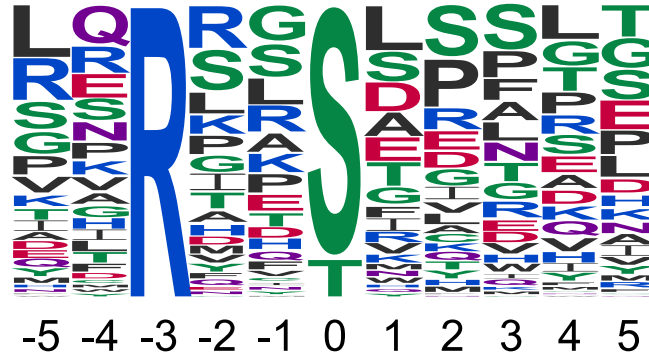

..RR.[ST]..... ( 20)  
..R..[ST]..... (110)

114

130/974

17

0.56

MAP2K4 STE\_STE7

-5 -4 -3 -2 -1 0 1 2 3 4 5

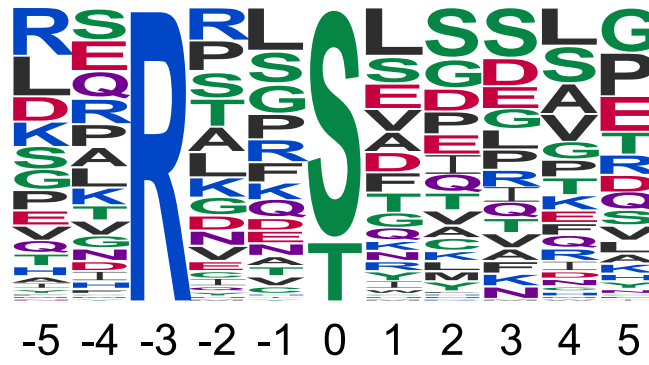

..R..[ST]..... (116)

110

116/961

13

0.56

MAP2K6 STE\_STE7

-5 -4 -3 -2 -1 0 1 2 3 4 5

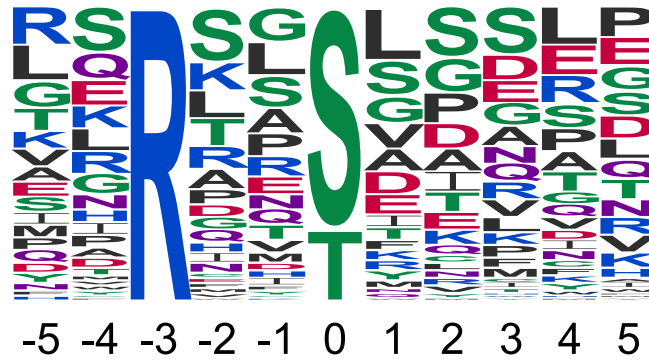

..R..[ST]..... (116)

81

116/717

9

0.56

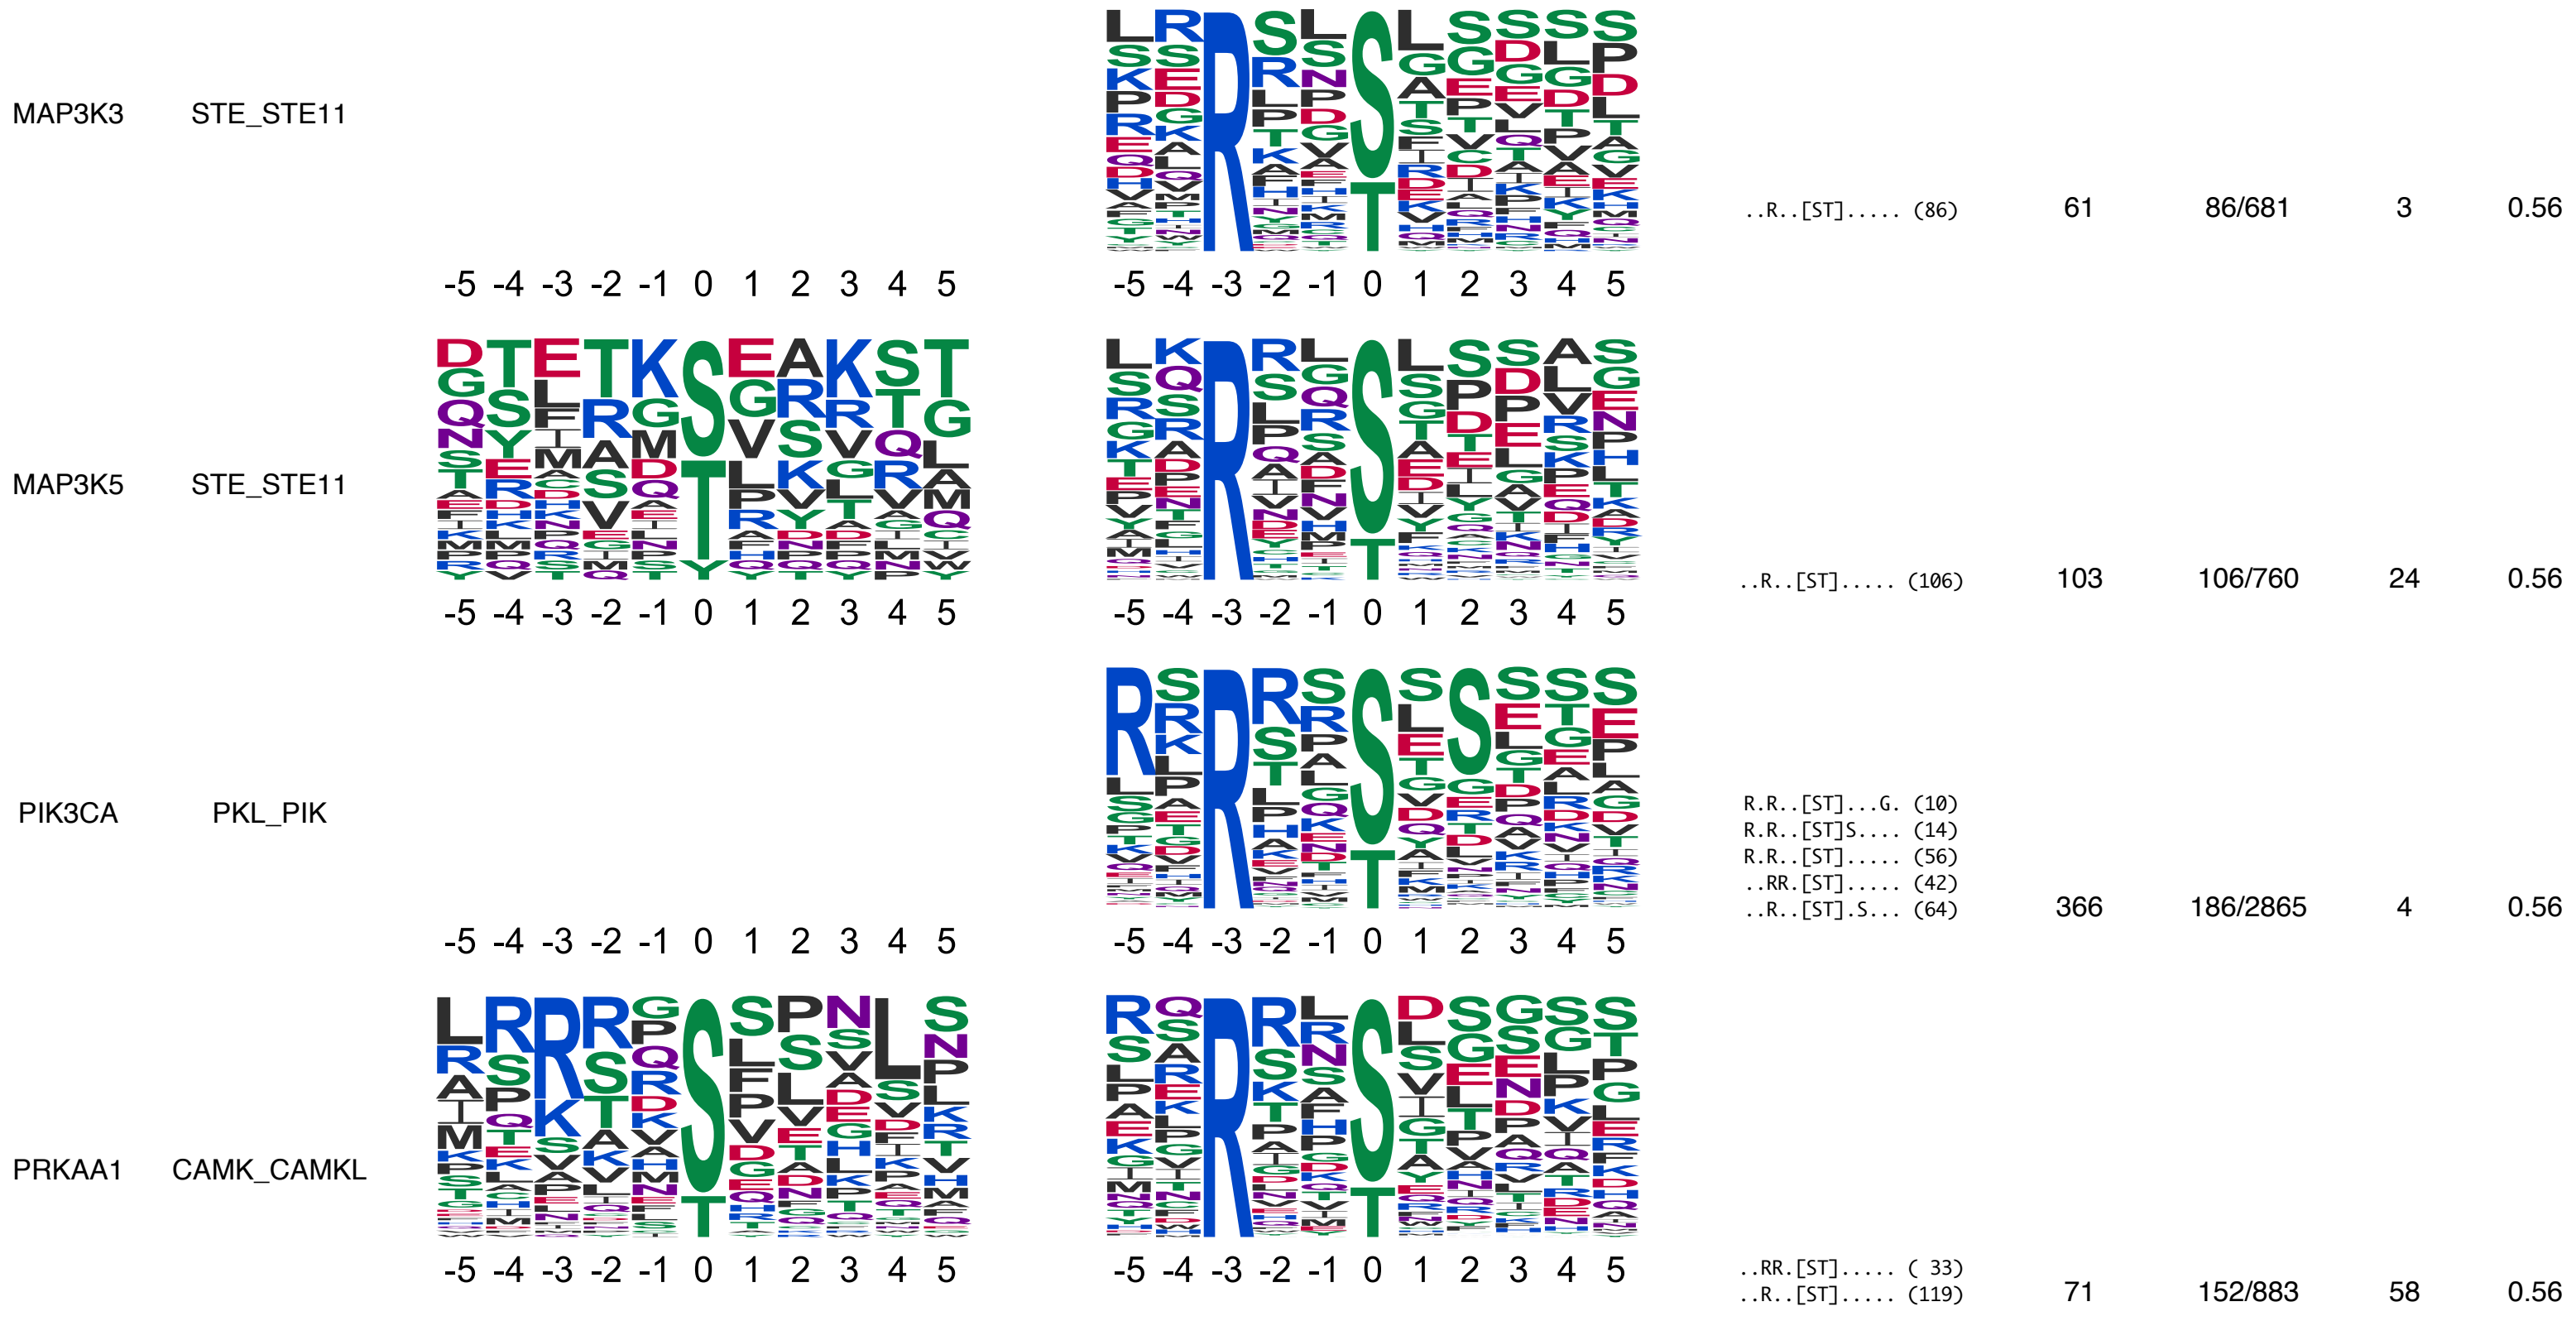



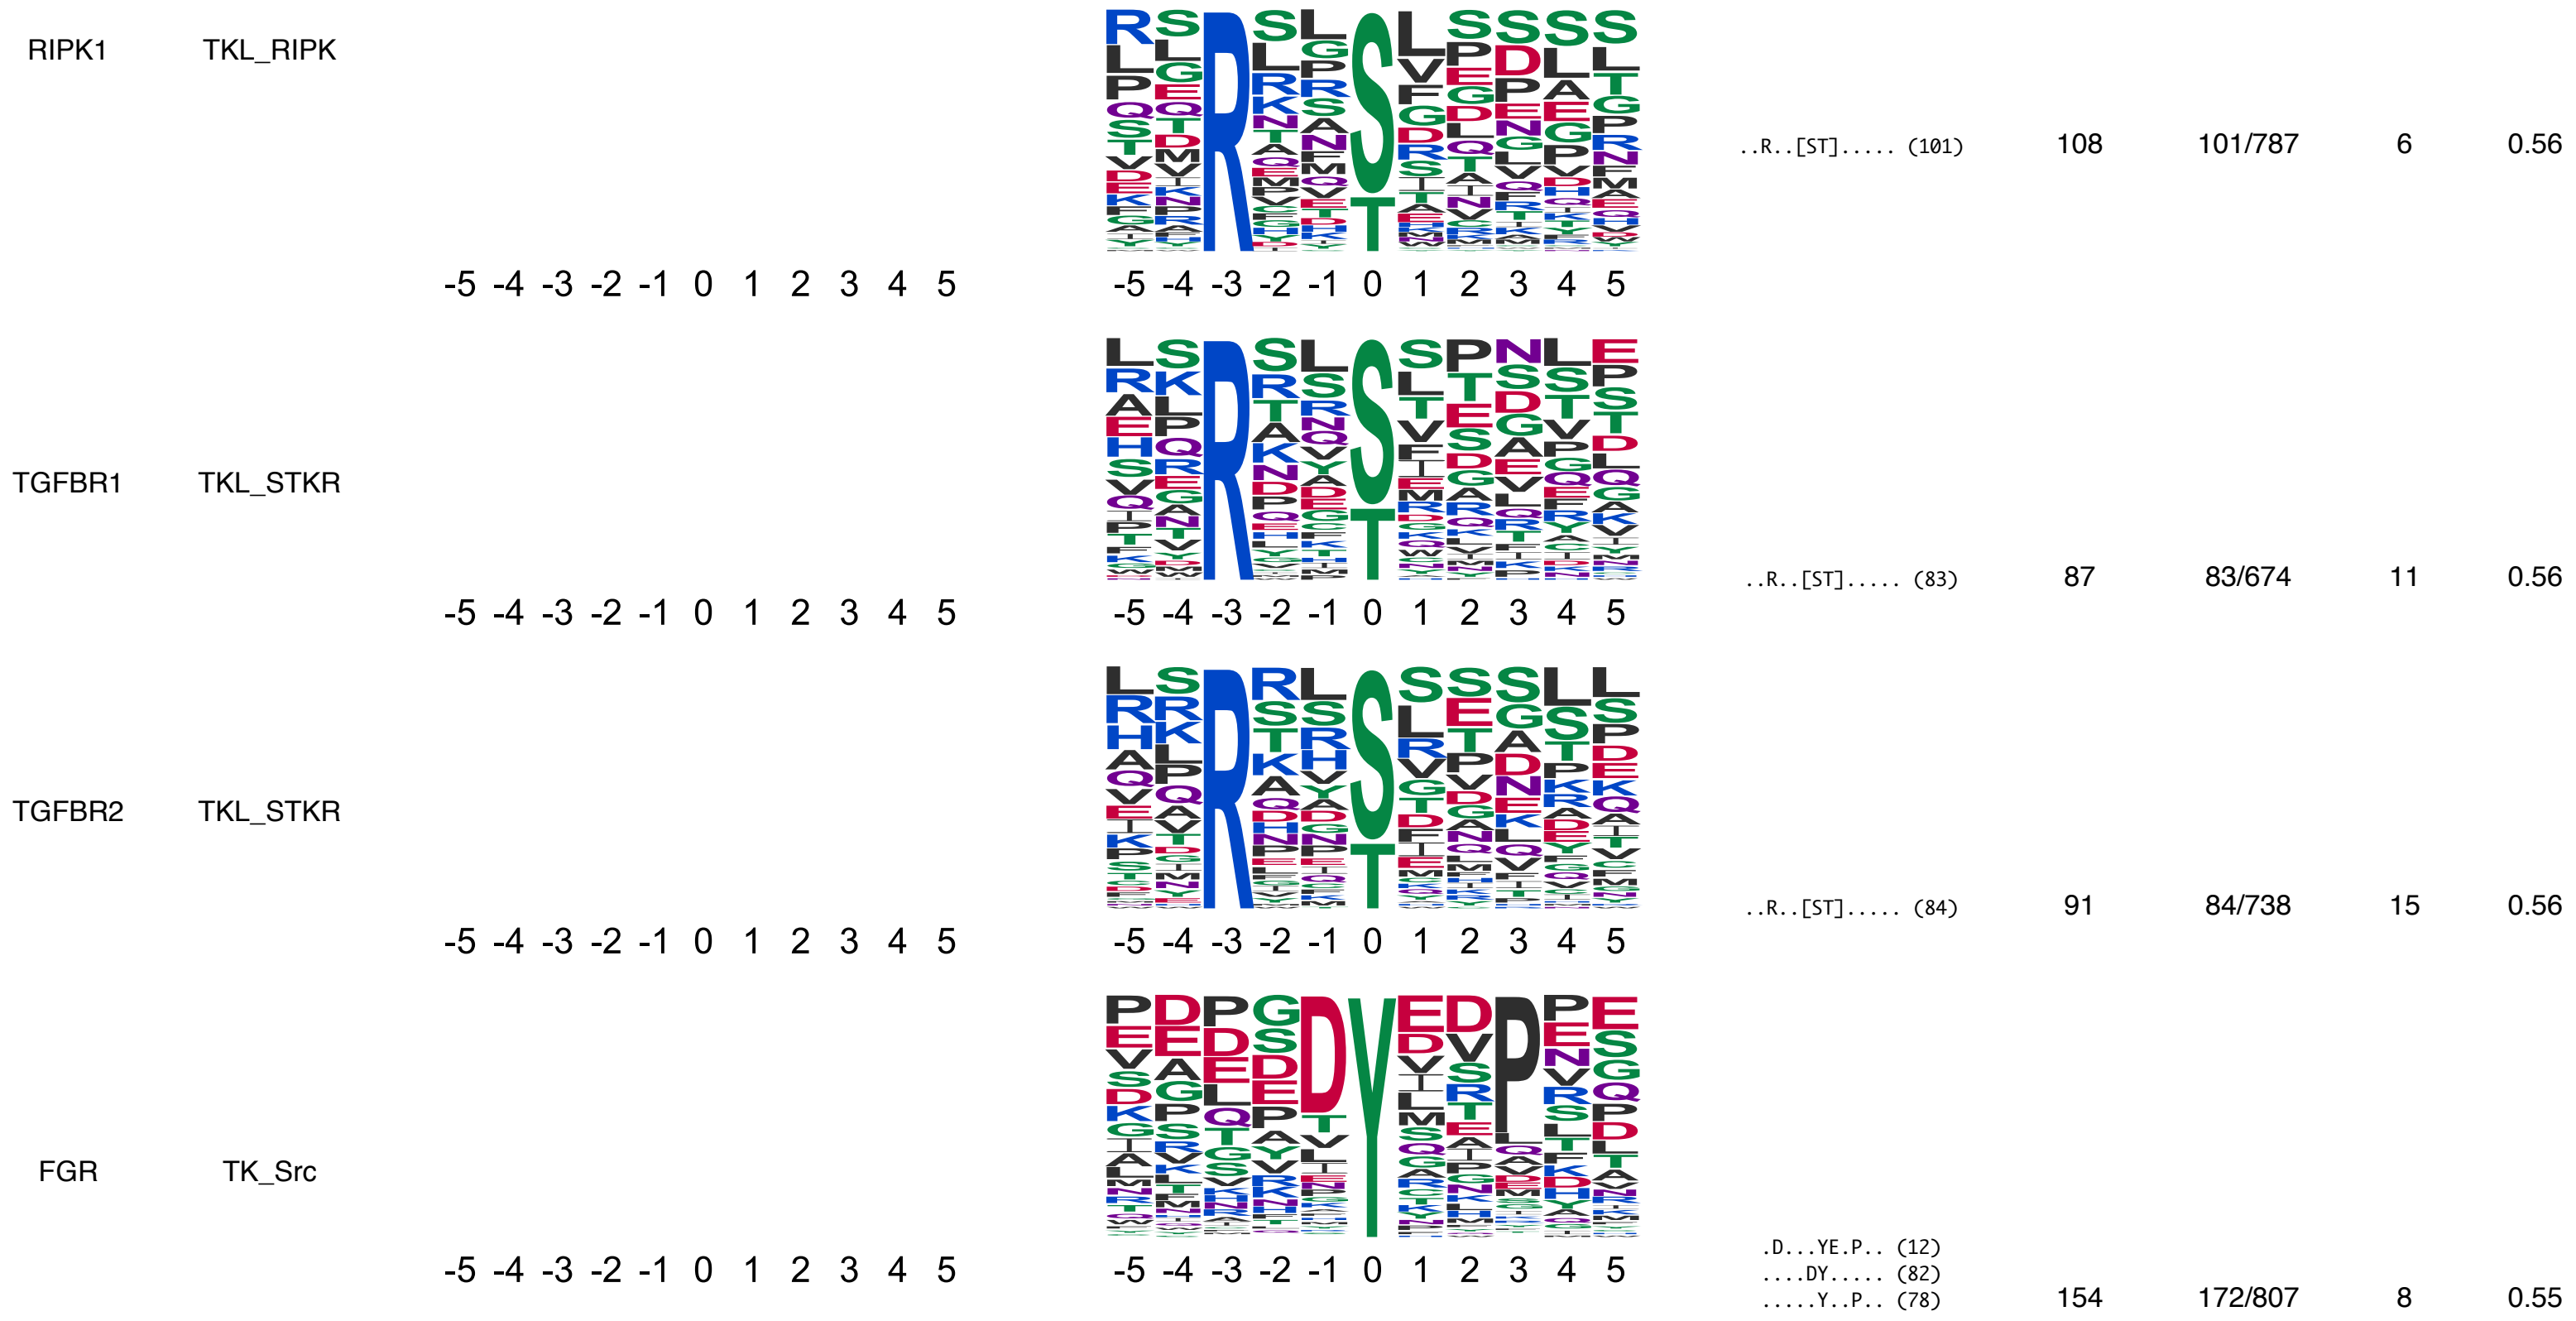

ILK TKL\_MLK

-5 -4 -3 -2 -1 0 1 2 3 4 5

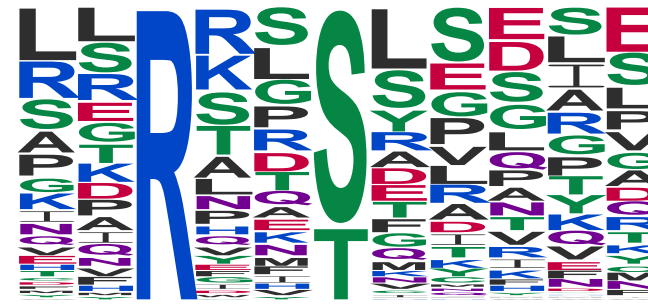

-5 -4 -3 -2 -1 0 1 2 3 4 5

..RR.[ST]..... ( 23)  
..R..[ST]..... (117)

104

140/1147

8

0.55

LYN TK\_Src

-5 -4 -3 -2 -1 0 1 2 3 4 5

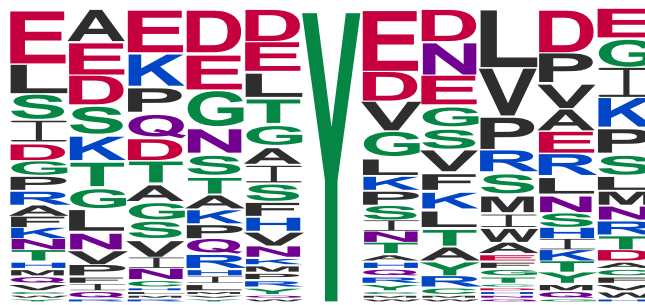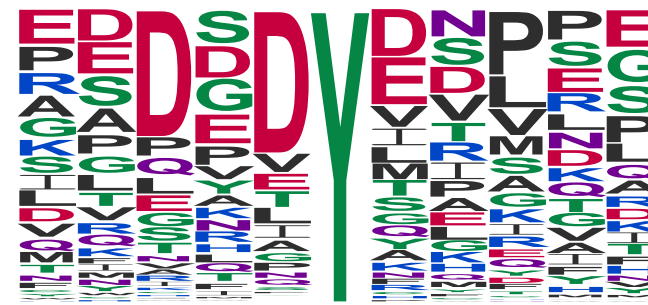

-5 -4 -3 -2 -1 0 1 2 3 4 5

.D...YE.P.. ( 13)  
...VYD.P.. ( 10)  
...DY..... (139)  
.....YD.P.. ( 18)  
..D..Y..... (106)

243

286/1268

79

0.55

MAP3K7 TKL\_MLK

-5 -4 -3 -2 -1 0 1 2 3 4 5

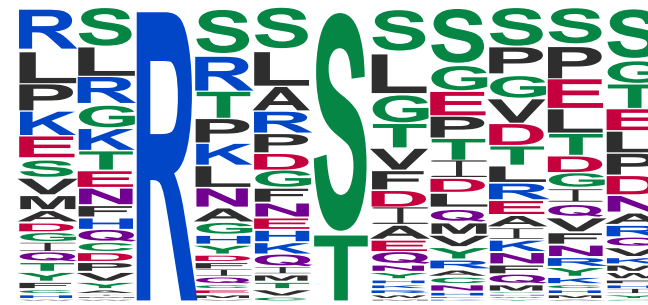

-5 -4 -3 -2 -1 0 1 2 3 4 5

..R..[ST]..... (119)

126

119/911

12

0.55

PLK3 Other\_PLK

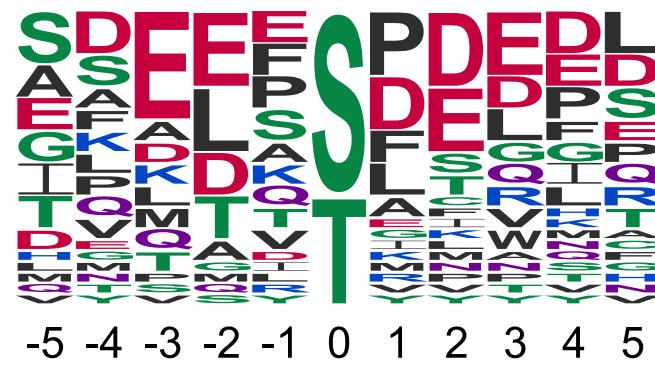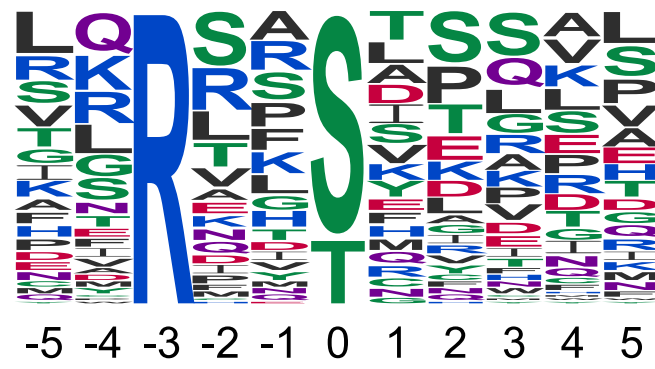

..R..[ST]..... (88) 52 88/754 27 0.55

PTK2B TK\_FAK

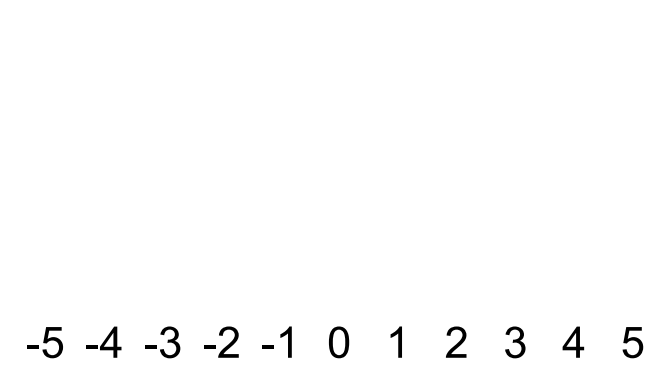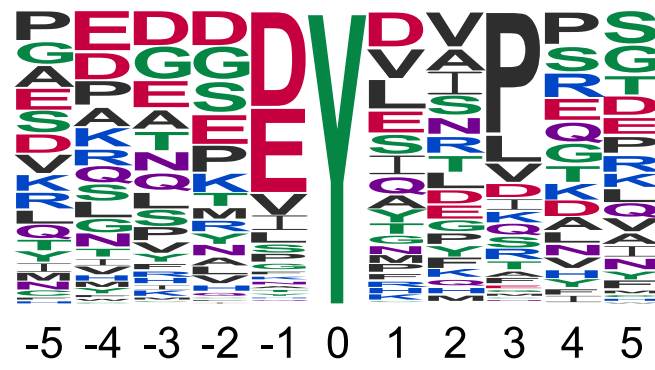

....VYD.P... (10)  
 .....Y.VP... (20)  
 ....DY..... (76)  
 .....Y..P... (64)  
 ....EY..... (62) 125 232/714 12 0.55

RET TK\_Ret

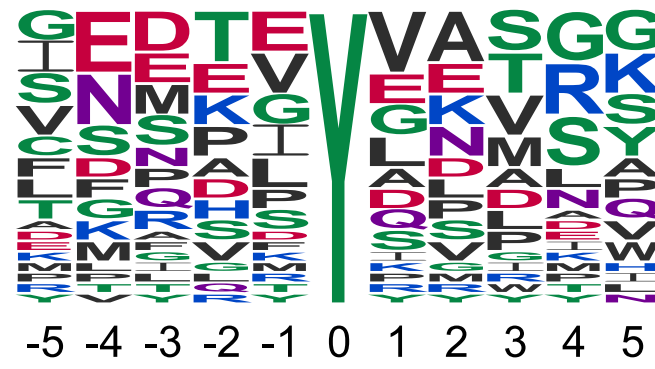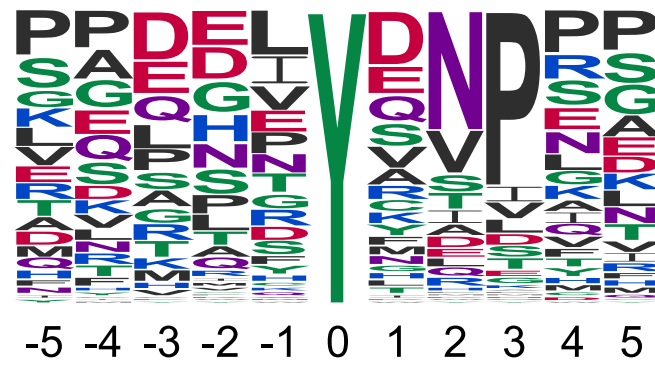

.....YD.PP. (10)  
 .....Y.N.... (49)  
 .....Y..P... (63) 163 122/585 28 0.55

TAOK1 STE\_STE20

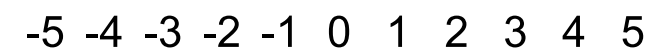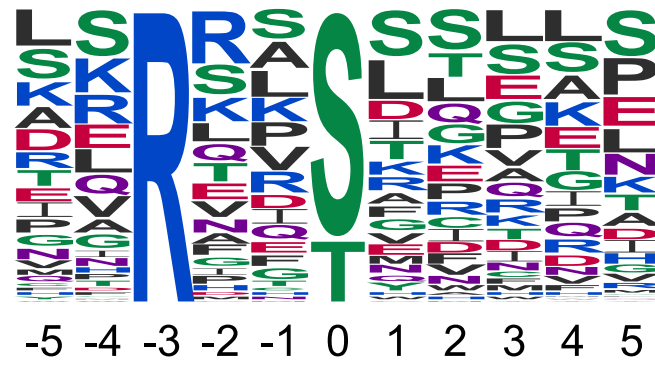

..RR.[ST]..... ( 25)  
 ..R..[ST]..... (107) 76 132/1116 0 0.55

HCK

TK\_Src

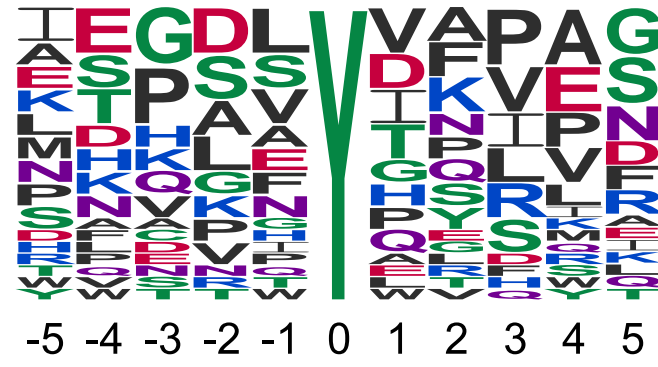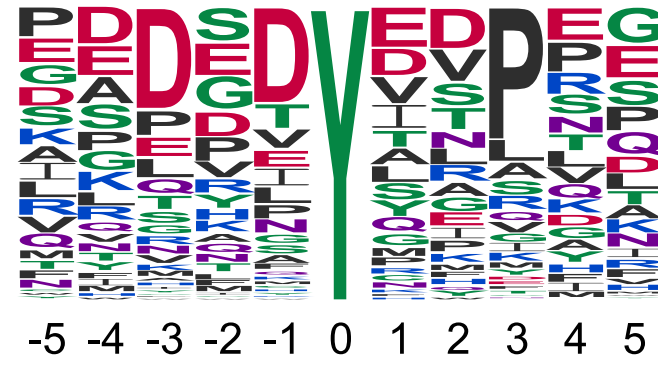

.D...YE.P... (12)  
 .....YD.P... (17)  
 ..D..Y..... (82)  
 ....DY..... (72)  
 .....Y..P.. (67)

161

250/853

25

0.54

MTOR

Atypical\_PIKK

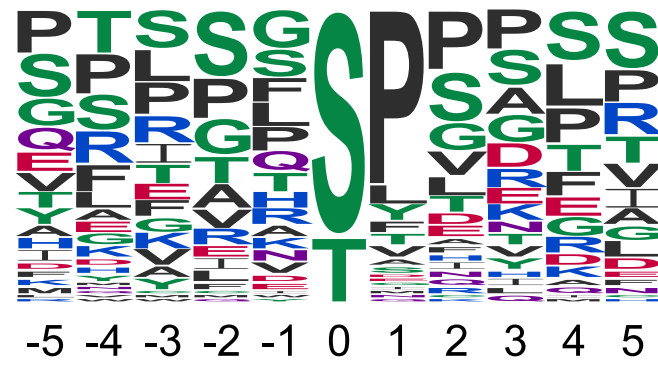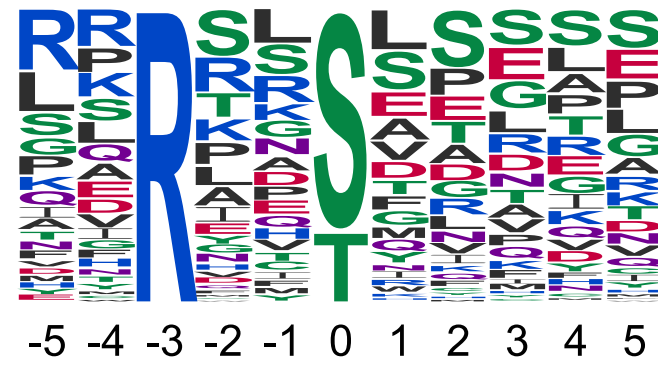

RPR..[ST]..... ( 10)  
 R.R..[ST]..S... ( 15)  
 ..RR.[ST]..... ( 43)  
 R.R..[ST]..... ( 48)  
 ..R..[ST]..... (245)

264

361/2509

72

0.54

PLK2

Other\_PLK

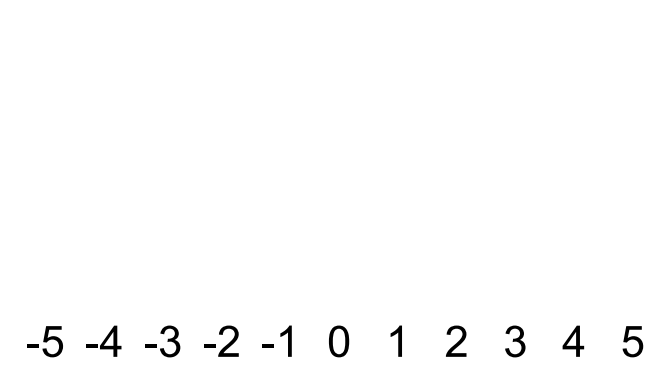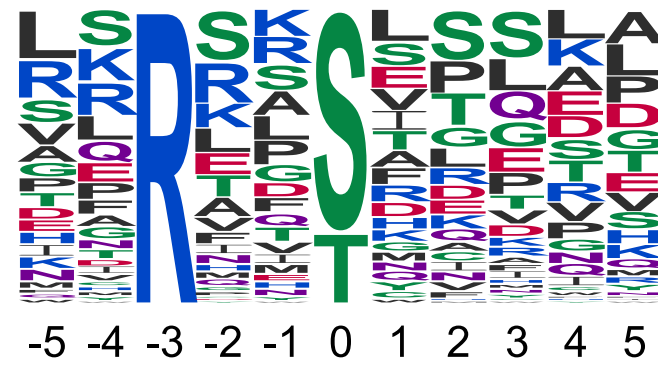

..R..[ST]..... (119)

65

119/969

11

0.54

IKBKB

Other\_IKK

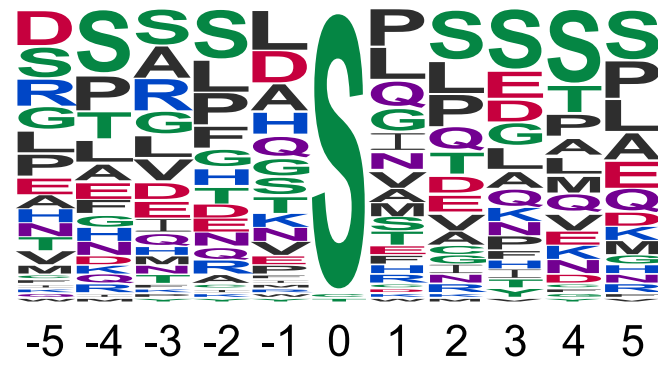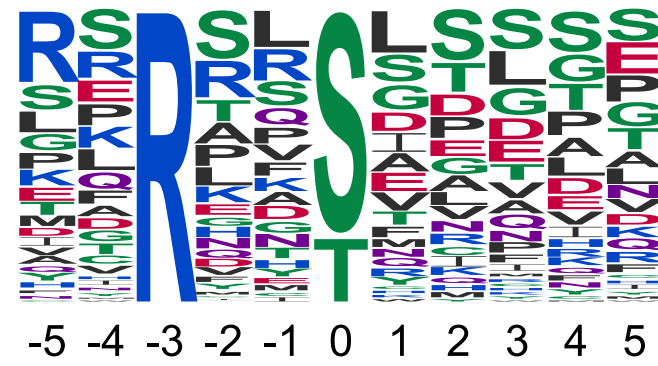

R.R..[ST]...G. ( 10)  
 R.R..[ST]..... ( 43)  
 ..RR.[ST]..... ( 23)  
 ..R..[ST]..... (134)

164

210/1585

63

0.53

LCK

TK\_Src

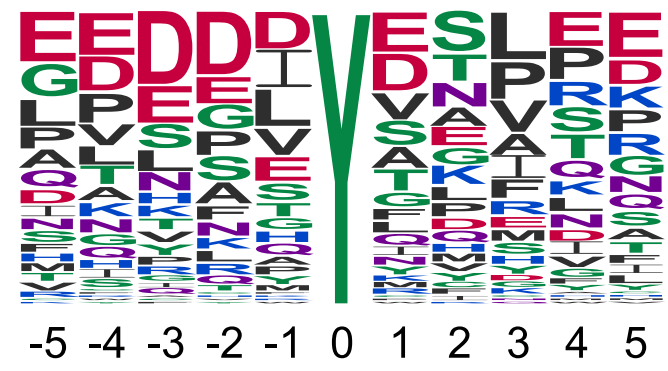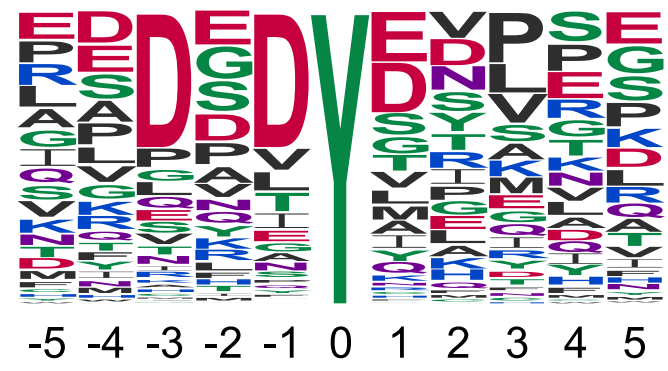

.D...YE.P.. ( 13)  
 .....YD.PP. ( 13)  
 ..D..Y..... (144)  
 ....DY..... (127)  
 .....YDY... ( 15)

275 312/1362 91 0.53

PDGFRB

TK\_PDGFR

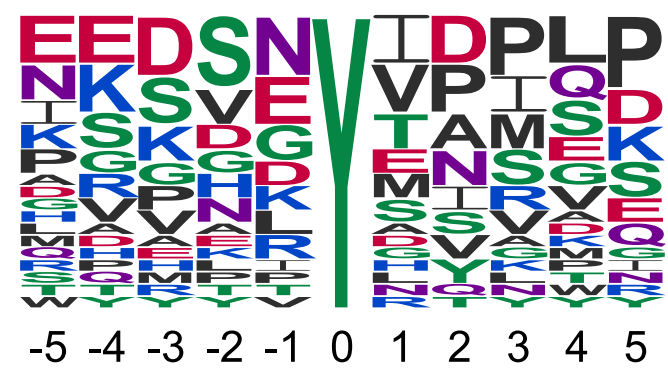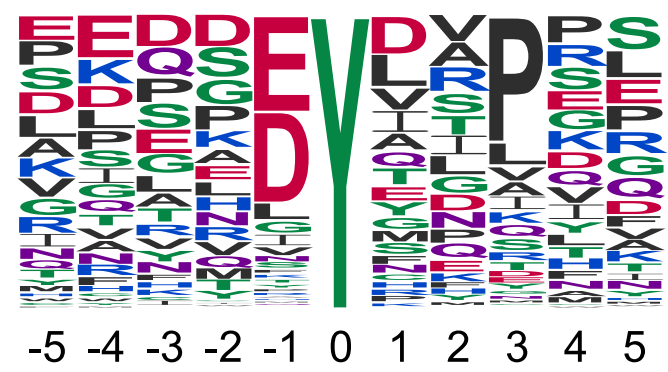

.....YD.PP. (10)  
 .....Y..P.. (92)  
 ....DY..... (68)  
 ....EY..... (66)

153 236/769 24 0.53

JAK1

TK\_JAK

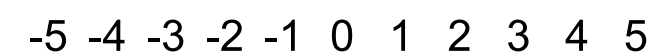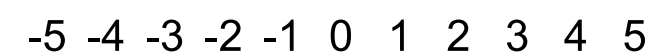

....EY..... (78)  
 ....DY..... (71)  
 ..D..Y..... (58)

174 207/743 15 0.52

JAK2

TK\_JAK

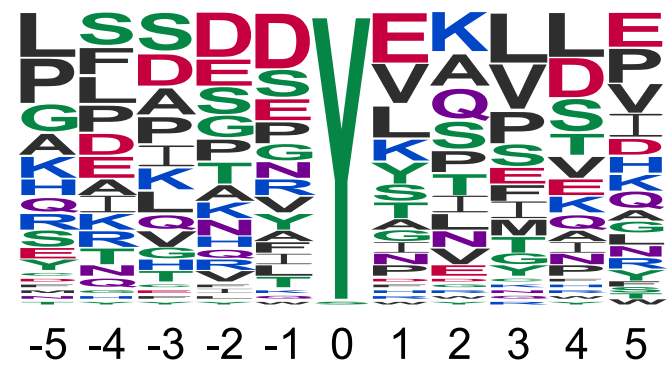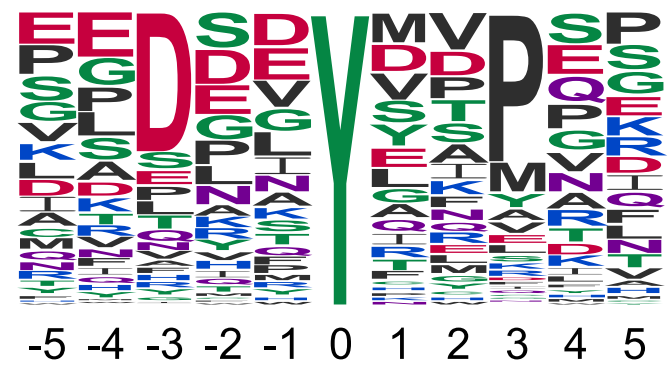

.....YM.M.. (11)  
 ..D..Y..... (98)  
 .....Y..P.. (96)

272 205/1050 51 0.52

KDR TK\_VEGFR

-5 -4 -3 -2 -1 0 1 2 3 4 5

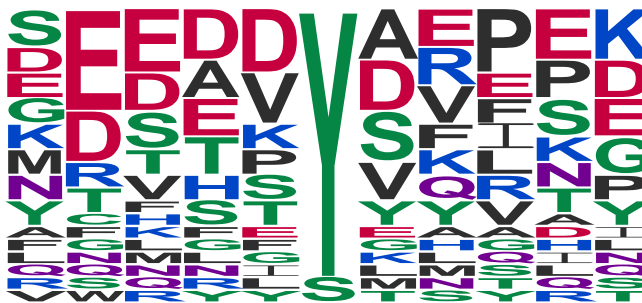

-5 -4 -3 -2 -1 0 1 2 3 4 5

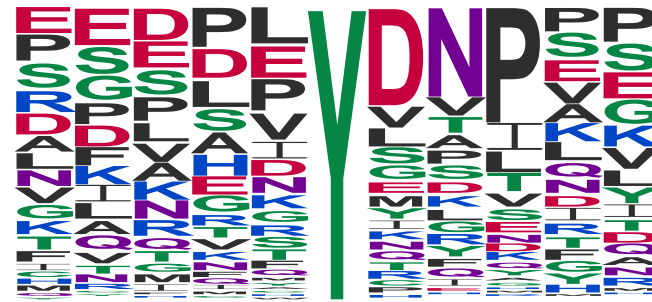

-5 -4 -3 -2 -1 0 1 2 3 4 5

.....Y..P.. (68)  
.....Y.N... (51)  
.....YD.... (52)

163 171/631 10 0.52

PTK2 TK\_FAK

-5 -4 -3 -2 -1 0 1 2 3 4 5



-5 -4 -3 -2 -1 0 1 2 3 4 5

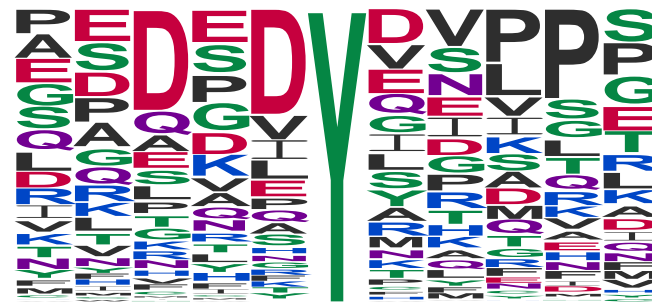

....VYD.P.. ( 10)  
.....Y.VP.. ( 22)  
....DY..... (108)  
..D..Y..... ( 89)  
.....Y...P. ( 70)

180 299/1021 23 0.52

YES1 TK\_Src

-5 -4 -3 -2 -1 0 1 2 3 4 5

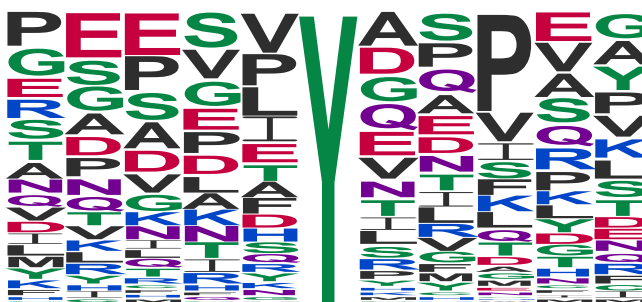

-5 -4 -3 -2 -1 0 1 2 3 4 5

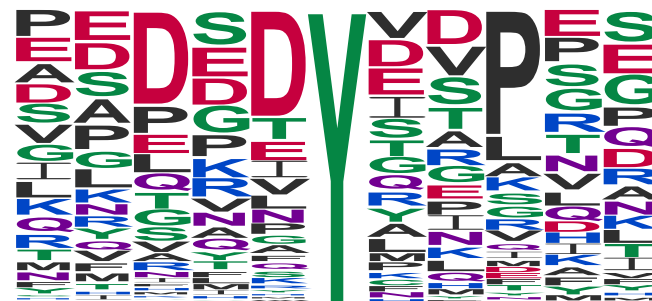

.D...YE.P.. ( 10)  
.....Y..P.. (114)  
....DY..... ( 95)  
..D..Y..... ( 72)

179 291/1012 10 0.52

ABL1 TK\_Abl

-5 -4 -3 -2 -1 0 1 2 3 4 5



-5 -4 -3 -2 -1 0 1 2 3 4 5

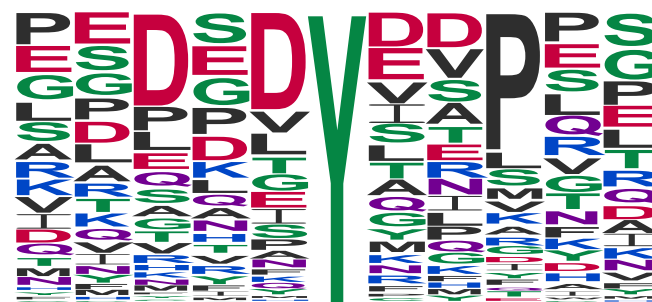

.....YD.PP. ( 14)  
....TY.DP.. ( 12)  
.....Y..P.. (164)  
....DY..... (123)  
..D..Y..... ( 90)

262 403/1308 126 0.51

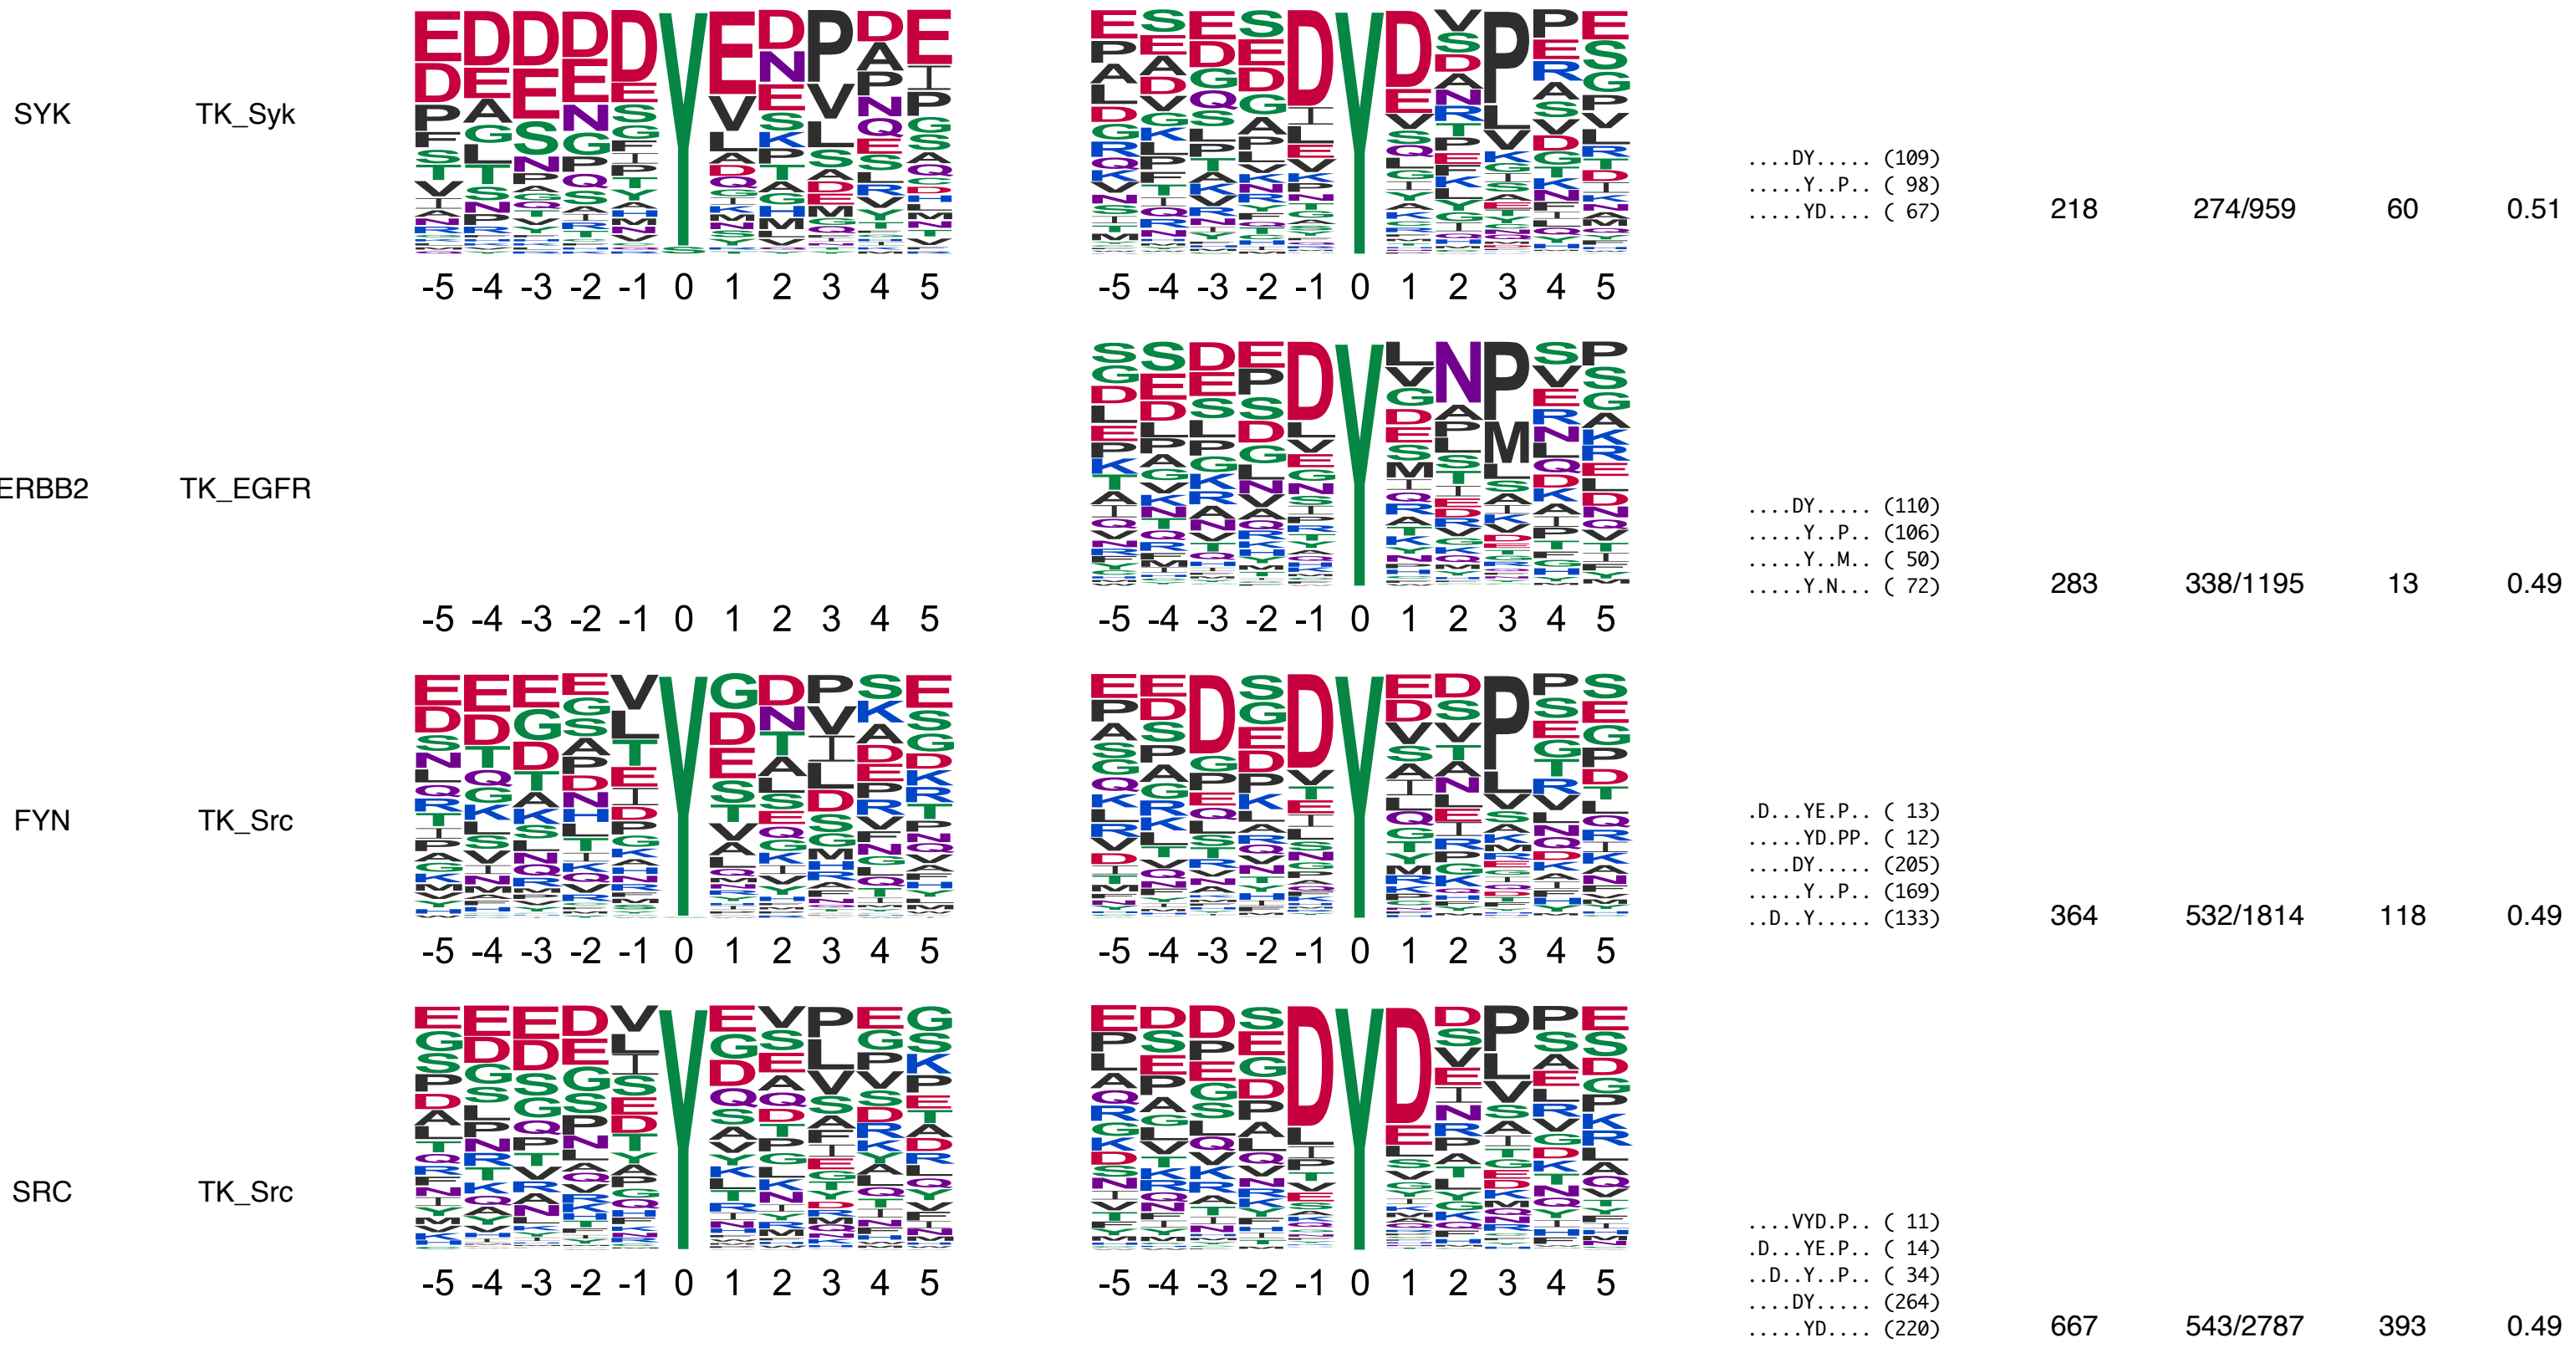

EGFR TK\_EGFR

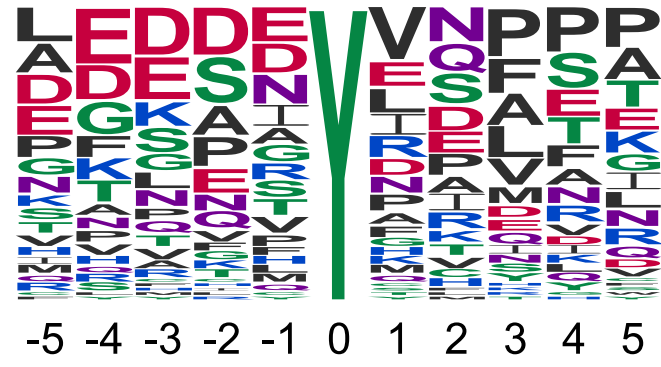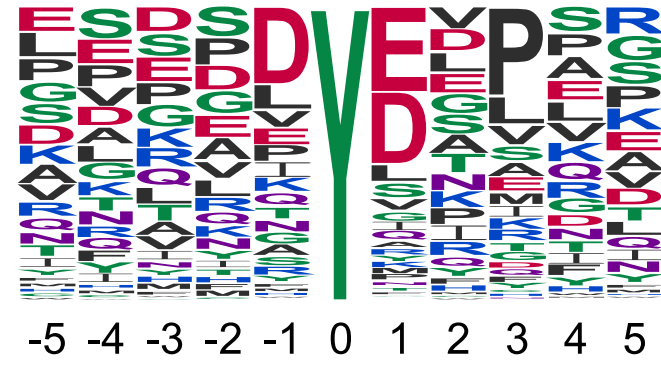

.....Y..P.. (204)  
 ....DY..... (170)  
 .....YE.... (172)  
 .....YD.... (128)

535 674/2050 66 0.44

STK26 STE\_STE20

-5 -4 -3 -2 -1 0 1 2 3 4 5

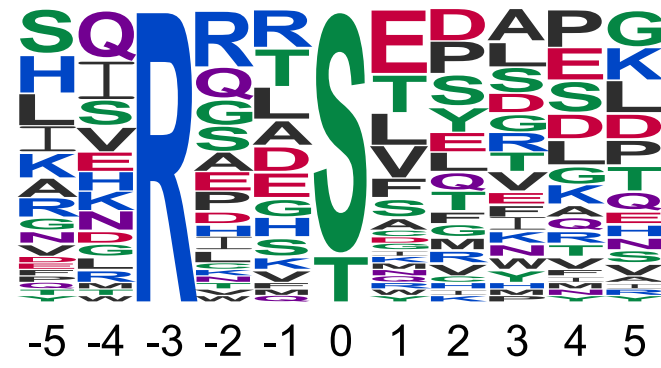

..R..[ST]..... (45)

36 45/299 4 NA
